# Supplementary material for: Functional and embedding feature analysis for pan-cancer classification
Source: Front Oncol. 2022 Sep 29;12:979336. doi: 10.3389/fonc.2022.979336 (PMC9559388; doi:10.3389/fonc.2022.979336)
Supplement: Supplementary Table 4 — Classification rules extracted by the optimal DT classifier under each feature list. [file Table_4.xlsx]

## Sheet: Rules on Lasso feature list
Rules_0	passed counts:160
node_0: feature_name=GO:0019002	GO:0019002.value > threshold=0.44260887801647186
node_1592: feature_name=GO:0019002	GO:0019002.value > threshold=1.837906301021576
node_1624: feature_name=GO:0044028	GO:0044028.value <= threshold=2.6347100734710693
node_1625: feature_name=GO:0019002	GO:0019002.value <= threshold=2.587051510810852
node_1626: feature_name=hsa05215	hsa05215.value > threshold=0.49044638872146606
node_1634: feature_name=n361	n361.value > threshold=0.0004270000044925837
node_1646: feature_name=GO:0045671	GO:0045671.value <= threshold=1.0868683457374573
node_1647: feature_name=w51	w51.value <= threshold=-0.194194994866848
node_1648: feature_name=w156	w156.value <= threshold=-0.16211050003767014
node_1649: feature_name=hsa05230	hsa05230.value > threshold=0.6107595264911652
node_1653: feature_name=w12	w12.value > threshold=-0.23204400390386581
Class: COADREAD
Rules_1	passed counts:121
node_0: feature_name=GO:0019002	GO:0019002.value <= threshold=0.44260887801647186
node_1: feature_name=GO:0031052	GO:0031052.value > threshold=1.5308658480644226
node_1165: feature_name=hsa05214	hsa05214.value <= threshold=1.511171042919159
node_1166: feature_name=GO:0042772	GO:0042772.value > threshold=1.405928909778595
node_1312: feature_name=GO:0007141	GO:0007141.value <= threshold=1.2595189213752747
node_1313: feature_name=GO:0031056	GO:0031056.value > threshold=0.5744103491306305
node_1323: feature_name=GO:0032101	GO:0032101.value <= threshold=1.6673882603645325
node_1324: feature_name=GO:0001508	GO:0001508.value <= threshold=1.8742843270301819
node_1325: feature_name=GO:0007399	GO:0007399.value > threshold=0.16499362885951996
node_1345: feature_name=GO:0022404	GO:0022404.value <= threshold=0.16996821761131287
node_1346: feature_name=GO:0005218	GO:0005218.value <= threshold=1.6579931378364563
node_1347: feature_name=GO:0072331	GO:0072331.value > threshold=0.5463034808635712
node_1363: feature_name=w38	w38.value <= threshold=0.05917999893426895
node_1364: feature_name=w89	w89.value <= threshold=-0.2339470013976097
node_1365: feature_name=GO:0001759	GO:0001759.value <= threshold=1.3416604399681091
node_1366: feature_name=n46	n46.value <= threshold=-0.039025500416755676
node_1367: feature_name=n236	n236.value > threshold=-0.03170749917626381
node_1369: feature_name=n428	n428.value > threshold=0.06328549981117249
node_1371: feature_name=GO:0060047	GO:0060047.value <= threshold=1.5270589590072632
node_1372: feature_name=GO:0043228	GO:0043228.value > threshold=0.03418398275971413
node_1376: feature_name=w37	w37.value > threshold=0.11702299863100052
node_1380: feature_name=n442	n442.value <= threshold=-0.03578200004994869
node_1381: feature_name=n207	n207.value > threshold=-0.051640501245856285
node_1385: feature_name=GO:0044237	GO:0044237.value > threshold=0.006282690912485123
Class: OV
Rules_2	passed counts:115
node_0: feature_name=GO:0019002	GO:0019002.value <= threshold=0.44260887801647186
node_1: feature_name=GO:0031052	GO:0031052.value <= threshold=1.5308658480644226
node_2: feature_name=GO:0044029	GO:0044029.value > threshold=2.612712264060974
node_1138: feature_name=GO:0035112	GO:0035112.value <= threshold=0.8113309741020203
node_1139: feature_name=GO:1901800	GO:1901800.value <= threshold=1.6445645093917847
node_1140: feature_name=GO:0051251	GO:0051251.value > threshold=0.49030888080596924
node_1152: feature_name=w73	w73.value <= threshold=0.013275000266730785
node_1153: feature_name=GO:0051606	GO:0051606.value <= threshold=2.7153565883636475
node_1154: feature_name=n240	n240.value <= threshold=0.03148699924349785
Class: BRCA
Rules_3	passed counts:103
node_0: feature_name=GO:0019002	GO:0019002.value <= threshold=0.44260887801647186
node_1: feature_name=GO:0031052	GO:0031052.value <= threshold=1.5308658480644226
node_2: feature_name=GO:0044029	GO:0044029.value <= threshold=2.612712264060974
node_3: feature_name=GO:0061428	GO:0061428.value > threshold=1.6541950702667236
node_1127: feature_name=GO:0006139	GO:0006139.value > threshold=0.0069610344944521785
node_1135: feature_name=n244	n244.value > threshold=0.03836450167000294
Class: KIRC
Rules_4	passed counts:60
node_0: feature_name=GO:0019002	GO:0019002.value <= threshold=0.44260887801647186
node_1: feature_name=GO:0031052	GO:0031052.value > threshold=1.5308658480644226
node_1165: feature_name=hsa05214	hsa05214.value <= threshold=1.511171042919159
node_1166: feature_name=GO:0042772	GO:0042772.value > threshold=1.405928909778595
node_1312: feature_name=GO:0007141	GO:0007141.value > threshold=1.2595189213752747
node_1472: feature_name=GO:0036211	GO:0036211.value <= threshold=1.6254581809043884
node_1473: feature_name=n412	n412.value <= threshold=-0.025983000174164772
node_1474: feature_name=w72	w72.value <= threshold=0.04401949979364872
node_1475: feature_name=w221	w221.value <= threshold=0.3212215006351471
node_1476: feature_name=GO:0060415	GO:0060415.value <= threshold=1.3383662700653076
node_1477: feature_name=w234	w234.value > threshold=0.020455499179661274
Class: OV
Rules_5	passed counts:59
node_0: feature_name=GO:0019002	GO:0019002.value <= threshold=0.44260887801647186
node_1: feature_name=GO:0031052	GO:0031052.value <= threshold=1.5308658480644226
node_2: feature_name=GO:0044029	GO:0044029.value <= threshold=2.612712264060974
node_3: feature_name=GO:0061428	GO:0061428.value <= threshold=1.6541950702667236
node_4: feature_name=GO:0050911	GO:0050911.value <= threshold=9.647738242579695e-06
node_5: feature_name=GO:0006461	GO:0006461.value <= threshold=0.0025558413472026587
node_6: feature_name=GO:0044092	GO:0044092.value <= threshold=0.04476059600710869
node_7: feature_name=w189	w189.value > threshold=0.051299501210451126
node_31: feature_name=hsa04750	hsa04750.value <= threshold=1.322605848312378
node_32: feature_name=GO:0031410	GO:0031410.value <= threshold=0.8911392390727997
node_33: feature_name=n328	n328.value <= threshold=0.04595400020480156
node_34: feature_name=GO:0060571	GO:0060571.value <= threshold=0.6617918610572815
node_35: feature_name=GO:0007416	GO:0007416.value <= threshold=1.1571043729782104
node_36: feature_name=n24	n24.value <= threshold=0.0004040000058012083
Class: LAML
Rules_6	passed counts:51
node_0: feature_name=GO:0019002	GO:0019002.value <= threshold=0.44260887801647186
node_1: feature_name=GO:0031052	GO:0031052.value <= threshold=1.5308658480644226
node_2: feature_name=GO:0044029	GO:0044029.value <= threshold=2.612712264060974
node_3: feature_name=GO:0061428	GO:0061428.value <= threshold=1.6541950702667236
node_4: feature_name=GO:0050911	GO:0050911.value <= threshold=9.647738242579695e-06
node_5: feature_name=GO:0006461	GO:0006461.value > threshold=0.0025558413472026587
node_93: feature_name=GO:0030277	GO:0030277.value > threshold=1.1837461590766907
node_413: feature_name=n203	n203.value <= threshold=-0.05545550025999546
node_414: feature_name=n228	n228.value > threshold=0.0008064999419730157
node_422: feature_name=n52	n52.value > threshold=0.09244799986481667
node_426: feature_name=GO:0090132	GO:0090132.value <= threshold=1.2648620009422302
node_427: feature_name=GO:0010821	GO:0010821.value <= threshold=1.2543747425079346
Class: KIRC
Rules_7	passed counts:49
node_0: feature_name=GO:0019002	GO:0019002.value <= threshold=0.44260887801647186
node_1: feature_name=GO:0031052	GO:0031052.value <= threshold=1.5308658480644226
node_2: feature_name=GO:0044029	GO:0044029.value <= threshold=2.612712264060974
node_3: feature_name=GO:0061428	GO:0061428.value <= threshold=1.6541950702667236
node_4: feature_name=GO:0050911	GO:0050911.value <= threshold=9.647738242579695e-06
node_5: feature_name=GO:0006461	GO:0006461.value > threshold=0.0025558413472026587
node_93: feature_name=GO:0030277	GO:0030277.value <= threshold=1.1837461590766907
node_94: feature_name=GO:0006346	GO:0006346.value <= threshold=1.8170061111450195
node_95: feature_name=n76	n76.value > threshold=0.002943999948911369
node_275: feature_name=GO:0070601	GO:0070601.value <= threshold=0.5473223328590393
node_276: feature_name=n238	n238.value <= threshold=0.0742735005915165
node_277: feature_name=n225	n225.value <= threshold=0.05840349942445755
node_278: feature_name=hsa04917	hsa04917.value <= threshold=1.0047158002853394
node_279: feature_name=n254	n254.value > threshold=-0.017405000515282154
node_305: feature_name=GO:0022607	GO:0022607.value > threshold=0.04075557366013527
node_309: feature_name=n222	n222.value > threshold=-0.13315249979496002
node_311: feature_name=GO:0031667	GO:0031667.value <= threshold=1.4075182676315308
node_312: feature_name=n396	n396.value > threshold=-0.008482499979436398
node_314: feature_name=GO:0031295	GO:0031295.value <= threshold=1.3296116590499878
Class: KIRC
Rules_8	passed counts:45
node_0: feature_name=GO:0019002	GO:0019002.value <= threshold=0.44260887801647186
node_1: feature_name=GO:0031052	GO:0031052.value <= threshold=1.5308658480644226
node_2: feature_name=GO:0044029	GO:0044029.value <= threshold=2.612712264060974
node_3: feature_name=GO:0061428	GO:0061428.value <= threshold=1.6541950702667236
node_4: feature_name=GO:0050911	GO:0050911.value > threshold=9.647738242579695e-06
node_442: feature_name=GO:0031056	GO:0031056.value > threshold=0.012155923061072826
node_784: feature_name=GO:0050911	GO:0050911.value > threshold=0.9555114507675171
node_1060: feature_name=n413	n413.value <= threshold=-0.051284000277519226
node_1061: feature_name=GO:2001141	GO:2001141.value <= threshold=0.9192121624946594
node_1062: feature_name=GO:0071230	GO:0071230.value <= threshold=0.835265189409256
node_1063: feature_name=GO:0051488	GO:0051488.value <= threshold=0.5319586247205734
node_1064: feature_name=GO:0045936	GO:0045936.value > threshold=0.027348666451871395
node_1072: feature_name=GO:0090183	GO:0090183.value <= threshold=0.6573530733585358
node_1073: feature_name=n375	n375.value > threshold=0.031125500798225403
node_1077: feature_name=n442	n442.value <= threshold=-0.053947001695632935
Class: LUSC
Rules_9	passed counts:39
node_0: feature_name=GO:0019002	GO:0019002.value > threshold=0.44260887801647186
node_1592: feature_name=GO:0019002	GO:0019002.value <= threshold=1.837906301021576
node_1593: feature_name=n6	n6.value > threshold=0.03690900094807148
node_1615: feature_name=hsa05213	hsa05213.value <= threshold=2.16629159450531
node_1616: feature_name=GO:0001558	GO:0001558.value > threshold=0.016589926555752754
Class: LUAD
Rules_10	passed counts:37
node_0: feature_name=GO:0019002	GO:0019002.value <= threshold=0.44260887801647186
node_1: feature_name=GO:0031052	GO:0031052.value <= threshold=1.5308658480644226
node_2: feature_name=GO:0044029	GO:0044029.value <= threshold=2.612712264060974
node_3: feature_name=GO:0061428	GO:0061428.value <= threshold=1.6541950702667236
node_4: feature_name=GO:0050911	GO:0050911.value > threshold=9.647738242579695e-06
node_442: feature_name=GO:0031056	GO:0031056.value > threshold=0.012155923061072826
node_784: feature_name=GO:0050911	GO:0050911.value <= threshold=0.9555114507675171
node_785: feature_name=GO:1902804	GO:1902804.value > threshold=0.39919959008693695
node_1045: feature_name=n263	n263.value > threshold=-0.09578999876976013
node_1053: feature_name=n120	n120.value > threshold=-0.07595450058579445
node_1057: feature_name=n133	n133.value > threshold=-0.060372499749064445
Class: COADREAD
Rules_11	passed counts:36
node_0: feature_name=GO:0019002	GO:0019002.value <= threshold=0.44260887801647186
node_1: feature_name=GO:0031052	GO:0031052.value <= threshold=1.5308658480644226
node_2: feature_name=GO:0044029	GO:0044029.value <= threshold=2.612712264060974
node_3: feature_name=GO:0061428	GO:0061428.value <= threshold=1.6541950702667236
node_4: feature_name=GO:0050911	GO:0050911.value > threshold=9.647738242579695e-06
node_442: feature_name=GO:0031056	GO:0031056.value <= threshold=0.012155923061072826
node_443: feature_name=GO:0031657	GO:0031657.value <= threshold=1.5778968930244446
node_444: feature_name=GO:0050804	GO:0050804.value <= threshold=0.01197261456400156
node_445: feature_name=n8	n8.value > threshold=-0.09153800085186958
node_469: feature_name=GO:0098655	GO:0098655.value <= threshold=1.5729240775108337
node_470: feature_name=n266	n266.value > threshold=-0.010881000198423862
node_506: feature_name=GO:0015276	GO:0015276.value <= threshold=0.4701277017593384
node_507: feature_name=w89	w89.value > threshold=-0.3049499988555908
node_511: feature_name=GO:0043229	GO:0043229.value > threshold=0.03389906696975231
node_515: feature_name=GO:0007411	GO:0007411.value <= threshold=0.5589516758918762
node_516: feature_name=w6	w6.value > threshold=-0.03357799910008907
node_528: feature_name=w94	w94.value > threshold=-0.21141649782657623
node_532: feature_name=n166	n166.value <= threshold=0.16485700011253357
Class: KIRC
Rules_12	passed counts:30
node_0: feature_name=GO:0019002	GO:0019002.value <= threshold=0.44260887801647186
node_1: feature_name=GO:0031052	GO:0031052.value <= threshold=1.5308658480644226
node_2: feature_name=GO:0044029	GO:0044029.value <= threshold=2.612712264060974
node_3: feature_name=GO:0061428	GO:0061428.value <= threshold=1.6541950702667236
node_4: feature_name=GO:0050911	GO:0050911.value > threshold=9.647738242579695e-06
node_442: feature_name=GO:0031056	GO:0031056.value <= threshold=0.012155923061072826
node_443: feature_name=GO:0031657	GO:0031657.value > threshold=1.5778968930244446
node_761: feature_name=n83	n83.value > threshold=0.0128389997407794
node_773: feature_name=w48	w48.value <= threshold=0.04566800035536289
Class: GBM
Rules_13	passed counts:29
node_0: feature_name=GO:0019002	GO:0019002.value <= threshold=0.44260887801647186
node_1: feature_name=GO:0031052	GO:0031052.value <= threshold=1.5308658480644226
node_2: feature_name=GO:0044029	GO:0044029.value <= threshold=2.612712264060974
node_3: feature_name=GO:0061428	GO:0061428.value <= threshold=1.6541950702667236
node_4: feature_name=GO:0050911	GO:0050911.value > threshold=9.647738242579695e-06
node_442: feature_name=GO:0031056	GO:0031056.value > threshold=0.012155923061072826
node_784: feature_name=GO:0050911	GO:0050911.value <= threshold=0.9555114507675171
node_785: feature_name=GO:1902804	GO:1902804.value <= threshold=0.39919959008693695
node_786: feature_name=GO:0090069	GO:0090069.value > threshold=0.1206773966550827
node_1018: feature_name=GO:0016202	GO:0016202.value > threshold=0.01845661550760269
node_1030: feature_name=GO:0071900	GO:0071900.value > threshold=0.07444171793758869
node_1034: feature_name=GO:0061053	GO:0061053.value <= threshold=1.274516761302948
node_1035: feature_name=GO:0072073	GO:0072073.value > threshold=0.015377888455986977
node_1039: feature_name=GO:0044425	GO:0044425.value <= threshold=2.6696687936782837
Class: UCEC
Rules_14	passed counts:28
node_0: feature_name=GO:0019002	GO:0019002.value <= threshold=0.44260887801647186
node_1: feature_name=GO:0031052	GO:0031052.value <= threshold=1.5308658480644226
node_2: feature_name=GO:0044029	GO:0044029.value <= threshold=2.612712264060974
node_3: feature_name=GO:0061428	GO:0061428.value <= threshold=1.6541950702667236
node_4: feature_name=GO:0050911	GO:0050911.value > threshold=9.647738242579695e-06
node_442: feature_name=GO:0031056	GO:0031056.value > threshold=0.012155923061072826
node_784: feature_name=GO:0050911	GO:0050911.value > threshold=0.9555114507675171
node_1060: feature_name=n413	n413.value > threshold=-0.051284000277519226
node_1100: feature_name=GO:0001569	GO:0001569.value > threshold=0.0787336677312851
node_1116: feature_name=GO:0060538	GO:0060538.value > threshold=0.051006682217121124
node_1118: feature_name=GO:0009746	GO:0009746.value <= threshold=0.7514004707336426
node_1119: feature_name=GO:0006644	GO:0006644.value > threshold=0.004933030950269313
Class: LUAD
Rules_15	passed counts:27
node_0: feature_name=GO:0019002	GO:0019002.value <= threshold=0.44260887801647186
node_1: feature_name=GO:0031052	GO:0031052.value <= threshold=1.5308658480644226
node_2: feature_name=GO:0044029	GO:0044029.value <= threshold=2.612712264060974
node_3: feature_name=GO:0061428	GO:0061428.value <= threshold=1.6541950702667236
node_4: feature_name=GO:0050911	GO:0050911.value <= threshold=9.647738242579695e-06
node_5: feature_name=GO:0006461	GO:0006461.value > threshold=0.0025558413472026587
node_93: feature_name=GO:0030277	GO:0030277.value <= threshold=1.1837461590766907
node_94: feature_name=GO:0006346	GO:0006346.value <= threshold=1.8170061111450195
node_95: feature_name=n76	n76.value > threshold=0.002943999948911369
node_275: feature_name=GO:0070601	GO:0070601.value <= threshold=0.5473223328590393
node_276: feature_name=n238	n238.value > threshold=0.0742735005915165
node_326: feature_name=n90	n90.value > threshold=-0.01138749998062849
node_340: feature_name=GO:0006928	GO:0006928.value > threshold=0.14370637387037277
node_350: feature_name=GO:0016567	GO:0016567.value <= threshold=0.21442794799804688
node_351: feature_name=n294	n294.value <= threshold=0.04047349840402603
node_352: feature_name=n360	n360.value <= threshold=-0.02237500064074993
node_353: feature_name=GO:0001882	GO:0001882.value <= threshold=1.578866422176361
node_354: feature_name=n32	n32.value <= threshold=0.09376300126314163
node_355: feature_name=w43	w43.value <= threshold=-0.2078629955649376
Class: KIRC
Rules_16	passed counts:26
node_0: feature_name=GO:0019002	GO:0019002.value <= threshold=0.44260887801647186
node_1: feature_name=GO:0031052	GO:0031052.value <= threshold=1.5308658480644226
node_2: feature_name=GO:0044029	GO:0044029.value <= threshold=2.612712264060974
node_3: feature_name=GO:0061428	GO:0061428.value <= threshold=1.6541950702667236
node_4: feature_name=GO:0050911	GO:0050911.value > threshold=9.647738242579695e-06
node_442: feature_name=GO:0031056	GO:0031056.value > threshold=0.012155923061072826
node_784: feature_name=GO:0050911	GO:0050911.value <= threshold=0.9555114507675171
node_785: feature_name=GO:1902804	GO:1902804.value <= threshold=0.39919959008693695
node_786: feature_name=GO:0090069	GO:0090069.value <= threshold=0.1206773966550827
node_787: feature_name=hsa05222	hsa05222.value > threshold=0.029254859313368797
node_853: feature_name=n110	n110.value > threshold=0.0028310000197961926
node_963: feature_name=n134	n134.value > threshold=-0.032697999849915504
node_969: feature_name=GO:0032502	GO:0032502.value <= threshold=3.2696011066436768
node_970: feature_name=GO:0005267	GO:0005267.value > threshold=0.0600297637283802
node_988: feature_name=GO:0046031	GO:0046031.value <= threshold=0.38890886306762695
node_989: feature_name=hsa04066	hsa04066.value <= threshold=0.8380911350250244
node_990: feature_name=n66	n66.value <= threshold=0.05945399962365627
Class: BLCA
Rules_17	passed counts:25
node_0: feature_name=GO:0019002	GO:0019002.value > threshold=0.44260887801647186
node_1592: feature_name=GO:0019002	GO:0019002.value <= threshold=1.837906301021576
node_1593: feature_name=n6	n6.value <= threshold=0.03690900094807148
node_1594: feature_name=GO:0031226	GO:0031226.value <= threshold=1.2442941069602966
node_1595: feature_name=GO:1903845	GO:1903845.value <= threshold=0.5970458984375
node_1596: feature_name=n490	n490.value <= threshold=-0.01935349963605404
Class: UCEC
Rules_18	passed counts:24
node_0: feature_name=GO:0019002	GO:0019002.value <= threshold=0.44260887801647186
node_1: feature_name=GO:0031052	GO:0031052.value > threshold=1.5308658480644226
node_1165: feature_name=hsa05214	hsa05214.value <= threshold=1.511171042919159
node_1166: feature_name=GO:0042772	GO:0042772.value <= threshold=1.405928909778595
node_1167: feature_name=GO:0005507	GO:0005507.value <= threshold=0.08644267916679382
node_1168: feature_name=GO:0032101	GO:0032101.value > threshold=0.03080336842685938
node_1178: feature_name=GO:0008543	GO:0008543.value <= threshold=1.4079149961471558
node_1179: feature_name=w84	w84.value > threshold=-0.0227889996021986
Class: OV
Rules_19	passed counts:23
node_0: feature_name=GO:0019002	GO:0019002.value <= threshold=0.44260887801647186
node_1: feature_name=GO:0031052	GO:0031052.value <= threshold=1.5308658480644226
node_2: feature_name=GO:0044029	GO:0044029.value > threshold=2.612712264060974
node_1138: feature_name=GO:0035112	GO:0035112.value > threshold=0.8113309741020203
Class: UCEC
Rules_20	passed counts:23
node_0: feature_name=GO:0019002	GO:0019002.value <= threshold=0.44260887801647186
node_1: feature_name=GO:0031052	GO:0031052.value <= threshold=1.5308658480644226
node_2: feature_name=GO:0044029	GO:0044029.value <= threshold=2.612712264060974
node_3: feature_name=GO:0061428	GO:0061428.value <= threshold=1.6541950702667236
node_4: feature_name=GO:0050911	GO:0050911.value > threshold=9.647738242579695e-06
node_442: feature_name=GO:0031056	GO:0031056.value > threshold=0.012155923061072826
node_784: feature_name=GO:0050911	GO:0050911.value <= threshold=0.9555114507675171
node_785: feature_name=GO:1902804	GO:1902804.value <= threshold=0.39919959008693695
node_786: feature_name=GO:0090069	GO:0090069.value <= threshold=0.1206773966550827
node_787: feature_name=hsa05222	hsa05222.value > threshold=0.029254859313368797
node_853: feature_name=n110	n110.value <= threshold=0.0028310000197961926
node_854: feature_name=n61	n61.value <= threshold=0.010850000195205212
node_855: feature_name=n379	n379.value <= threshold=-0.030453999526798725
node_856: feature_name=GO:0007389	GO:0007389.value <= threshold=1.3916093111038208
node_857: feature_name=n92	n92.value > threshold=0.04465950094163418
Class: HNSC
Rules_21	passed counts:23
node_0: feature_name=GO:0019002	GO:0019002.value <= threshold=0.44260887801647186
node_1: feature_name=GO:0031052	GO:0031052.value <= threshold=1.5308658480644226
node_2: feature_name=GO:0044029	GO:0044029.value <= threshold=2.612712264060974
node_3: feature_name=GO:0061428	GO:0061428.value <= threshold=1.6541950702667236
node_4: feature_name=GO:0050911	GO:0050911.value <= threshold=9.647738242579695e-06
node_5: feature_name=GO:0006461	GO:0006461.value > threshold=0.0025558413472026587
node_93: feature_name=GO:0030277	GO:0030277.value <= threshold=1.1837461590766907
node_94: feature_name=GO:0006346	GO:0006346.value <= threshold=1.8170061111450195
node_95: feature_name=n76	n76.value <= threshold=0.002943999948911369
node_96: feature_name=GO:0016055	GO:0016055.value <= threshold=0.03425486758351326
node_97: feature_name=n308	n308.value <= threshold=0.05376549996435642
node_98: feature_name=n500	n500.value <= threshold=0.07162800058722496
node_99: feature_name=n241	n241.value > threshold=-0.05847050063312054
node_111: feature_name=GO:0001508	GO:0001508.value <= threshold=1.1328851580619812
Class: BRCA
Rules_22	passed counts:22
node_0: feature_name=GO:0019002	GO:0019002.value <= threshold=0.44260887801647186
node_1: feature_name=GO:0031052	GO:0031052.value > threshold=1.5308658480644226
node_1165: feature_name=hsa05214	hsa05214.value > threshold=1.511171042919159
node_1493: feature_name=GO:0043560	GO:0043560.value <= threshold=1.633065402507782
node_1494: feature_name=GO:0031657	GO:0031657.value > threshold=1.520110011100769
node_1558: feature_name=n220	n220.value > threshold=0.07445700094103813
node_1572: feature_name=GO:0022603	GO:0022603.value <= threshold=1.181423544883728
Class: GBM
Rules_23	passed counts:22
node_0: feature_name=GO:0019002	GO:0019002.value <= threshold=0.44260887801647186
node_1: feature_name=GO:0031052	GO:0031052.value <= threshold=1.5308658480644226
node_2: feature_name=GO:0044029	GO:0044029.value <= threshold=2.612712264060974
node_3: feature_name=GO:0061428	GO:0061428.value <= threshold=1.6541950702667236
node_4: feature_name=GO:0050911	GO:0050911.value > threshold=9.647738242579695e-06
node_442: feature_name=GO:0031056	GO:0031056.value > threshold=0.012155923061072826
node_784: feature_name=GO:0050911	GO:0050911.value <= threshold=0.9555114507675171
node_785: feature_name=GO:1902804	GO:1902804.value <= threshold=0.39919959008693695
node_786: feature_name=GO:0090069	GO:0090069.value <= threshold=0.1206773966550827
node_787: feature_name=hsa05222	hsa05222.value > threshold=0.029254859313368797
node_853: feature_name=n110	n110.value <= threshold=0.0028310000197961926
node_854: feature_name=n61	n61.value > threshold=0.010850000195205212
node_876: feature_name=GO:0001658	GO:0001658.value <= threshold=0.5237079858779907
node_877: feature_name=GO:0019661	GO:0019661.value <= threshold=1.8170058131217957
node_878: feature_name=GO:0043465	GO:0043465.value > threshold=0.938182920217514
node_912: feature_name=GO:0035176	GO:0035176.value > threshold=0.2707503139972687
Class: LUSC
Rules_24	passed counts:21
node_0: feature_name=GO:0019002	GO:0019002.value <= threshold=0.44260887801647186
node_1: feature_name=GO:0031052	GO:0031052.value <= threshold=1.5308658480644226
node_2: feature_name=GO:0044029	GO:0044029.value <= threshold=2.612712264060974
node_3: feature_name=GO:0061428	GO:0061428.value <= threshold=1.6541950702667236
node_4: feature_name=GO:0050911	GO:0050911.value > threshold=9.647738242579695e-06
node_442: feature_name=GO:0031056	GO:0031056.value <= threshold=0.012155923061072826
node_443: feature_name=GO:0031657	GO:0031657.value <= threshold=1.5778968930244446
node_444: feature_name=GO:0050804	GO:0050804.value > threshold=0.01197261456400156
node_562: feature_name=n479	n479.value <= threshold=0.10103050246834755
node_563: feature_name=GO:0004930	GO:0004930.value <= threshold=1.3939525485038757
node_564: feature_name=GO:0044767	GO:0044767.value > threshold=0.2603907734155655
node_598: feature_name=GO:0032776	GO:0032776.value <= threshold=0.5589029490947723
node_599: feature_name=GO:0021801	GO:0021801.value <= threshold=1.1827324032783508
node_600: feature_name=n378	n378.value > threshold=-0.05305299907922745
node_610: feature_name=n444	n444.value > threshold=-0.06549949944019318
node_636: feature_name=n325	n325.value > threshold=0.020932000130414963
node_646: feature_name=GO:0055123	GO:0055123.value <= threshold=0.3335540145635605
node_647: feature_name=n35	n35.value <= threshold=0.0632684975862503
node_648: feature_name=GO:0032330	GO:0032330.value <= threshold=0.4994291216135025
node_649: feature_name=GO:0048585	GO:0048585.value <= threshold=0.6848097741603851
node_650: feature_name=GO:0098589	GO:0098589.value > threshold=0.2505045682191849
node_660: feature_name=GO:0034762	GO:0034762.value <= threshold=1.3473193049430847
Class: HNSC
Rules_25	passed counts:20
node_0: feature_name=GO:0019002	GO:0019002.value <= threshold=0.44260887801647186
node_1: feature_name=GO:0031052	GO:0031052.value > threshold=1.5308658480644226
node_1165: feature_name=hsa05214	hsa05214.value > threshold=1.511171042919159
node_1493: feature_name=GO:0043560	GO:0043560.value <= threshold=1.633065402507782
node_1494: feature_name=GO:0031657	GO:0031657.value <= threshold=1.520110011100769
node_1495: feature_name=GO:0051310	GO:0051310.value <= threshold=0.865888774394989
node_1496: feature_name=w190	w190.value > threshold=0.35905349254608154
node_1510: feature_name=n387	n387.value <= threshold=-0.013395499903708696
node_1511: feature_name=GO:0042633	GO:0042633.value > threshold=0.21441422402858734
node_1543: feature_name=GO:0032993	GO:0032993.value <= threshold=0.4007159620523453
node_1544: feature_name=n45	n45.value <= threshold=0.06370700150728226
Class: COADREAD
Rules_26	passed counts:19
node_0: feature_name=GO:0019002	GO:0019002.value > threshold=0.44260887801647186
node_1592: feature_name=GO:0019002	GO:0019002.value <= threshold=1.837906301021576
node_1593: feature_name=n6	n6.value <= threshold=0.03690900094807148
node_1594: feature_name=GO:0031226	GO:0031226.value > threshold=1.2442941069602966
node_1608: feature_name=GO:0034762	GO:0034762.value > threshold=0.3165191560983658
Class: COADREAD
Rules_27	passed counts:19
node_0: feature_name=GO:0019002	GO:0019002.value <= threshold=0.44260887801647186
node_1: feature_name=GO:0031052	GO:0031052.value <= threshold=1.5308658480644226
node_2: feature_name=GO:0044029	GO:0044029.value <= threshold=2.612712264060974
node_3: feature_name=GO:0061428	GO:0061428.value <= threshold=1.6541950702667236
node_4: feature_name=GO:0050911	GO:0050911.value > threshold=9.647738242579695e-06
node_442: feature_name=GO:0031056	GO:0031056.value <= threshold=0.012155923061072826
node_443: feature_name=GO:0031657	GO:0031657.value <= threshold=1.5778968930244446
node_444: feature_name=GO:0050804	GO:0050804.value > threshold=0.01197261456400156
node_562: feature_name=n479	n479.value > threshold=0.10103050246834755
node_738: feature_name=n455	n455.value <= threshold=0.033509500324726105
node_739: feature_name=hsa04912	hsa04912.value <= threshold=0.7391859591007233
node_740: feature_name=GO:0015276	GO:0015276.value <= threshold=1.4170982837677002
node_741: feature_name=GO:0010718	GO:0010718.value <= threshold=0.2519133985042572
Class: GBM
Rules_28	passed counts:18
node_0: feature_name=GO:0019002	GO:0019002.value <= threshold=0.44260887801647186
node_1: feature_name=GO:0031052	GO:0031052.value > threshold=1.5308658480644226
node_1165: feature_name=hsa05214	hsa05214.value > threshold=1.511171042919159
node_1493: feature_name=GO:0043560	GO:0043560.value > threshold=1.633065402507782
node_1575: feature_name=w96	w96.value > threshold=-0.1060819998383522
node_1587: feature_name=n3	n3.value <= threshold=0.10380249843001366
node_1588: feature_name=GO:0009205	GO:0009205.value <= threshold=1.8600122928619385
Class: BRCA
Rules_29	passed counts:18
node_0: feature_name=GO:0019002	GO:0019002.value <= threshold=0.44260887801647186
node_1: feature_name=GO:0031052	GO:0031052.value <= threshold=1.5308658480644226
node_2: feature_name=GO:0044029	GO:0044029.value <= threshold=2.612712264060974
node_3: feature_name=GO:0061428	GO:0061428.value <= threshold=1.6541950702667236
node_4: feature_name=GO:0050911	GO:0050911.value > threshold=9.647738242579695e-06
node_442: feature_name=GO:0031056	GO:0031056.value <= threshold=0.012155923061072826
node_443: feature_name=GO:0031657	GO:0031657.value <= threshold=1.5778968930244446
node_444: feature_name=GO:0050804	GO:0050804.value <= threshold=0.01197261456400156
node_445: feature_name=n8	n8.value <= threshold=-0.09153800085186958
node_446: feature_name=GO:0045664	GO:0045664.value <= threshold=0.01719135418534279
node_447: feature_name=n49	n49.value > threshold=-0.02999300044029951
node_451: feature_name=GO:0097458	GO:0097458.value <= threshold=0.5051359832286835
node_452: feature_name=n32	n32.value <= threshold=0.10056949779391289
Class: LAML
Rules_30	passed counts:17
node_0: feature_name=GO:0019002	GO:0019002.value <= threshold=0.44260887801647186
node_1: feature_name=GO:0031052	GO:0031052.value > threshold=1.5308658480644226
node_1165: feature_name=hsa05214	hsa05214.value <= threshold=1.511171042919159
node_1166: feature_name=GO:0042772	GO:0042772.value <= threshold=1.405928909778595
node_1167: feature_name=GO:0005507	GO:0005507.value > threshold=0.08644267916679382
node_1187: feature_name=n445	n445.value <= threshold=0.03499799966812134
node_1188: feature_name=GO:0044428	GO:0044428.value > threshold=0.15810610353946686
node_1216: feature_name=GO:0090199	GO:0090199.value > threshold=0.8135712444782257
node_1242: feature_name=GO:0044424	GO:0044424.value > threshold=0.25279374420642853
node_1260: feature_name=n72	n72.value > threshold=0.01874649990350008
node_1272: feature_name=GO:0043524	GO:0043524.value <= threshold=0.2160612940788269
node_1273: feature_name=n407	n407.value <= threshold=0.056507499888539314
node_1274: feature_name=GO:0071312	GO:0071312.value <= threshold=0.4672670364379883
Class: OV
Rules_31	passed counts:17
node_0: feature_name=GO:0019002	GO:0019002.value <= threshold=0.44260887801647186
node_1: feature_name=GO:0031052	GO:0031052.value > threshold=1.5308658480644226
node_1165: feature_name=hsa05214	hsa05214.value <= threshold=1.511171042919159
node_1166: feature_name=GO:0042772	GO:0042772.value <= threshold=1.405928909778595
node_1167: feature_name=GO:0005507	GO:0005507.value > threshold=0.08644267916679382
node_1187: feature_name=n445	n445.value <= threshold=0.03499799966812134
node_1188: feature_name=GO:0044428	GO:0044428.value > threshold=0.15810610353946686
node_1216: feature_name=GO:0090199	GO:0090199.value <= threshold=0.8135712444782257
node_1217: feature_name=GO:0072358	GO:0072358.value > threshold=0.4771808534860611
node_1229: feature_name=GO:0051298	GO:0051298.value <= threshold=0.6552181541919708
node_1230: feature_name=GO:0001840	GO:0001840.value <= threshold=1.039862334728241
Class: HNSC
Rules_32	passed counts:17
node_0: feature_name=GO:0019002	GO:0019002.value <= threshold=0.44260887801647186
node_1: feature_name=GO:0031052	GO:0031052.value <= threshold=1.5308658480644226
node_2: feature_name=GO:0044029	GO:0044029.value <= threshold=2.612712264060974
node_3: feature_name=GO:0061428	GO:0061428.value <= threshold=1.6541950702667236
node_4: feature_name=GO:0050911	GO:0050911.value <= threshold=9.647738242579695e-06
node_5: feature_name=GO:0006461	GO:0006461.value > threshold=0.0025558413472026587
node_93: feature_name=GO:0030277	GO:0030277.value <= threshold=1.1837461590766907
node_94: feature_name=GO:0006346	GO:0006346.value <= threshold=1.8170061111450195
node_95: feature_name=n76	n76.value <= threshold=0.002943999948911369
node_96: feature_name=GO:0016055	GO:0016055.value > threshold=0.03425486758351326
node_156: feature_name=n353	n353.value <= threshold=0.012018000241369009
node_157: feature_name=w192	w192.value <= threshold=-0.310294508934021
node_158: feature_name=GO:0006915	GO:0006915.value > threshold=0.20105624943971634
node_182: feature_name=GO:0007617	GO:0007617.value <= threshold=0.3775535225868225
node_183: feature_name=w242	w242.value > threshold=-0.16900649666786194
node_203: feature_name=GO:0040007	GO:0040007.value > threshold=0.05694119818508625
node_209: feature_name=w108	w108.value <= threshold=0.39283499121665955
node_210: feature_name=GO:0090344	GO:0090344.value <= threshold=0.4749457836151123
Class: HNSC
Rules_33	passed counts:16
node_0: feature_name=GO:0019002	GO:0019002.value <= threshold=0.44260887801647186
node_1: feature_name=GO:0031052	GO:0031052.value <= threshold=1.5308658480644226
node_2: feature_name=GO:0044029	GO:0044029.value <= threshold=2.612712264060974
node_3: feature_name=GO:0061428	GO:0061428.value <= threshold=1.6541950702667236
node_4: feature_name=GO:0050911	GO:0050911.value <= threshold=9.647738242579695e-06
node_5: feature_name=GO:0006461	GO:0006461.value <= threshold=0.0025558413472026587
node_6: feature_name=GO:0044092	GO:0044092.value > threshold=0.04476059600710869
node_50: feature_name=n493	n493.value > threshold=0.026771499775350094
node_58: feature_name=n384	n384.value <= threshold=-0.03503799997270107
node_59: feature_name=n293	n293.value <= threshold=0.023855000734329224
node_60: feature_name=GO:0008219	GO:0008219.value <= threshold=0.5487076938152313
Class: BRCA
Rules_34	passed counts:15
node_0: feature_name=GO:0019002	GO:0019002.value <= threshold=0.44260887801647186
node_1: feature_name=GO:0031052	GO:0031052.value <= threshold=1.5308658480644226
node_2: feature_name=GO:0044029	GO:0044029.value <= threshold=2.612712264060974
node_3: feature_name=GO:0061428	GO:0061428.value <= threshold=1.6541950702667236
node_4: feature_name=GO:0050911	GO:0050911.value > threshold=9.647738242579695e-06
node_442: feature_name=GO:0031056	GO:0031056.value > threshold=0.012155923061072826
node_784: feature_name=GO:0050911	GO:0050911.value <= threshold=0.9555114507675171
node_785: feature_name=GO:1902804	GO:1902804.value <= threshold=0.39919959008693695
node_786: feature_name=GO:0090069	GO:0090069.value <= threshold=0.1206773966550827
node_787: feature_name=hsa05222	hsa05222.value > threshold=0.029254859313368797
node_853: feature_name=n110	n110.value <= threshold=0.0028310000197961926
node_854: feature_name=n61	n61.value > threshold=0.010850000195205212
node_876: feature_name=GO:0001658	GO:0001658.value <= threshold=0.5237079858779907
node_877: feature_name=GO:0019661	GO:0019661.value > threshold=1.8170058131217957
node_925: feature_name=n45	n45.value <= threshold=0.054268499836325645
node_926: feature_name=GO:0005267	GO:0005267.value > threshold=0.04955550283193588
node_930: feature_name=GO:0033044	GO:0033044.value > threshold=0.26188456267118454
Class: HNSC
Rules_35	passed counts:15
node_0: feature_name=GO:0019002	GO:0019002.value <= threshold=0.44260887801647186
node_1: feature_name=GO:0031052	GO:0031052.value <= threshold=1.5308658480644226
node_2: feature_name=GO:0044029	GO:0044029.value <= threshold=2.612712264060974
node_3: feature_name=GO:0061428	GO:0061428.value <= threshold=1.6541950702667236
node_4: feature_name=GO:0050911	GO:0050911.value <= threshold=9.647738242579695e-06
node_5: feature_name=GO:0006461	GO:0006461.value > threshold=0.0025558413472026587
node_93: feature_name=GO:0030277	GO:0030277.value <= threshold=1.1837461590766907
node_94: feature_name=GO:0006346	GO:0006346.value > threshold=1.8170061111450195
Class: LAML
Rules_36	passed counts:15
node_0: feature_name=GO:0019002	GO:0019002.value <= threshold=0.44260887801647186
node_1: feature_name=GO:0031052	GO:0031052.value <= threshold=1.5308658480644226
node_2: feature_name=GO:0044029	GO:0044029.value <= threshold=2.612712264060974
node_3: feature_name=GO:0061428	GO:0061428.value <= threshold=1.6541950702667236
node_4: feature_name=GO:0050911	GO:0050911.value <= threshold=9.647738242579695e-06
node_5: feature_name=GO:0006461	GO:0006461.value > threshold=0.0025558413472026587
node_93: feature_name=GO:0030277	GO:0030277.value <= threshold=1.1837461590766907
node_94: feature_name=GO:0006346	GO:0006346.value <= threshold=1.8170061111450195
node_95: feature_name=n76	n76.value > threshold=0.002943999948911369
node_275: feature_name=GO:0070601	GO:0070601.value <= threshold=0.5473223328590393
node_276: feature_name=n238	n238.value > threshold=0.0742735005915165
node_326: feature_name=n90	n90.value > threshold=-0.01138749998062849
node_340: feature_name=GO:0006928	GO:0006928.value <= threshold=0.14370637387037277
node_341: feature_name=GO:2000027	GO:2000027.value <= threshold=0.7259751558303833
node_342: feature_name=w98	w98.value <= threshold=0.2554209977388382
Class: BRCA
Rules_37	passed counts:14
node_0: feature_name=GO:0019002	GO:0019002.value > threshold=0.44260887801647186
node_1592: feature_name=GO:0019002	GO:0019002.value > threshold=1.837906301021576
node_1624: feature_name=GO:0044028	GO:0044028.value > threshold=2.6347100734710693
node_1674: feature_name=w20	w20.value <= threshold=-0.14197949320077896
node_1675: feature_name=GO:0097345	GO:0097345.value <= threshold=1.1493285298347473
Class: UCEC
Rules_38	passed counts:14
node_0: feature_name=GO:0019002	GO:0019002.value > threshold=0.44260887801647186
node_1592: feature_name=GO:0019002	GO:0019002.value > threshold=1.837906301021576
node_1624: feature_name=GO:0044028	GO:0044028.value <= threshold=2.6347100734710693
node_1625: feature_name=GO:0019002	GO:0019002.value <= threshold=2.587051510810852
node_1626: feature_name=hsa05215	hsa05215.value <= threshold=0.49044638872146606
node_1627: feature_name=n76	n76.value <= threshold=0.003011499997228384
node_1628: feature_name=GO:0072073	GO:0072073.value > threshold=0.21791375428438187
Class: LUAD
Rules_39	passed counts:14
node_0: feature_name=GO:0019002	GO:0019002.value <= threshold=0.44260887801647186
node_1: feature_name=GO:0031052	GO:0031052.value > threshold=1.5308658480644226
node_1165: feature_name=hsa05214	hsa05214.value > threshold=1.511171042919159
node_1493: feature_name=GO:0043560	GO:0043560.value > threshold=1.633065402507782
node_1575: feature_name=w96	w96.value <= threshold=-0.1060819998383522
node_1576: feature_name=GO:0071331	GO:0071331.value <= threshold=1.186317503452301
node_1577: feature_name=GO:0001763	GO:0001763.value <= threshold=1.2715731859207153
node_1578: feature_name=GO:0001667	GO:0001667.value > threshold=0.19178621470928192
Class: UCEC
Rules_40	passed counts:14
node_0: feature_name=GO:0019002	GO:0019002.value <= threshold=0.44260887801647186
node_1: feature_name=GO:0031052	GO:0031052.value > threshold=1.5308658480644226
node_1165: feature_name=hsa05214	hsa05214.value <= threshold=1.511171042919159
node_1166: feature_name=GO:0042772	GO:0042772.value <= threshold=1.405928909778595
node_1167: feature_name=GO:0005507	GO:0005507.value > threshold=0.08644267916679382
node_1187: feature_name=n445	n445.value <= threshold=0.03499799966812134
node_1188: feature_name=GO:0044428	GO:0044428.value <= threshold=0.15810610353946686
node_1189: feature_name=n29	n29.value <= threshold=0.04300150088965893
node_1190: feature_name=w230	w230.value > threshold=-0.22866349667310715
Class: BRCA
Rules_41	passed counts:14
node_0: feature_name=GO:0019002	GO:0019002.value <= threshold=0.44260887801647186
node_1: feature_name=GO:0031052	GO:0031052.value <= threshold=1.5308658480644226
node_2: feature_name=GO:0044029	GO:0044029.value <= threshold=2.612712264060974
node_3: feature_name=GO:0061428	GO:0061428.value <= threshold=1.6541950702667236
node_4: feature_name=GO:0050911	GO:0050911.value > threshold=9.647738242579695e-06
node_442: feature_name=GO:0031056	GO:0031056.value <= threshold=0.012155923061072826
node_443: feature_name=GO:0031657	GO:0031657.value <= threshold=1.5778968930244446
node_444: feature_name=GO:0050804	GO:0050804.value > threshold=0.01197261456400156
node_562: feature_name=n479	n479.value <= threshold=0.10103050246834755
node_563: feature_name=GO:0004930	GO:0004930.value <= threshold=1.3939525485038757
node_564: feature_name=GO:0044767	GO:0044767.value <= threshold=0.2603907734155655
node_565: feature_name=GO:0004871	GO:0004871.value <= threshold=1.1131373047828674
node_566: feature_name=GO:0006304	GO:0006304.value <= threshold=0.10805657505989075
node_567: feature_name=n1	n1.value <= threshold=0.05370749905705452
node_568: feature_name=GO:0070647	GO:0070647.value <= threshold=1.069012701511383
Class: KIRC
Rules_42	passed counts:14
node_0: feature_name=GO:0019002	GO:0019002.value <= threshold=0.44260887801647186
node_1: feature_name=GO:0031052	GO:0031052.value <= threshold=1.5308658480644226
node_2: feature_name=GO:0044029	GO:0044029.value <= threshold=2.612712264060974
node_3: feature_name=GO:0061428	GO:0061428.value <= threshold=1.6541950702667236
node_4: feature_name=GO:0050911	GO:0050911.value <= threshold=9.647738242579695e-06
node_5: feature_name=GO:0006461	GO:0006461.value <= threshold=0.0025558413472026587
node_6: feature_name=GO:0044092	GO:0044092.value > threshold=0.04476059600710869
node_50: feature_name=n493	n493.value <= threshold=0.026771499775350094
node_51: feature_name=w97	w97.value > threshold=0.008656000019982457
node_55: feature_name=n176	n176.value <= threshold=0.16184300184249878
Class: LAML
Rules_43	passed counts:13
node_0: feature_name=GO:0019002	GO:0019002.value <= threshold=0.44260887801647186
node_1: feature_name=GO:0031052	GO:0031052.value > threshold=1.5308658480644226
node_1165: feature_name=hsa05214	hsa05214.value > threshold=1.511171042919159
node_1493: feature_name=GO:0043560	GO:0043560.value <= threshold=1.633065402507782
node_1494: feature_name=GO:0031657	GO:0031657.value <= threshold=1.520110011100769
node_1495: feature_name=GO:0051310	GO:0051310.value > threshold=0.865888774394989
node_1551: feature_name=GO:0033135	GO:0033135.value <= threshold=0.6457504332065582
Class: OV
Rules_44	passed counts:13
node_0: feature_name=GO:0019002	GO:0019002.value <= threshold=0.44260887801647186
node_1: feature_name=GO:0031052	GO:0031052.value <= threshold=1.5308658480644226
node_2: feature_name=GO:0044029	GO:0044029.value <= threshold=2.612712264060974
node_3: feature_name=GO:0061428	GO:0061428.value <= threshold=1.6541950702667236
node_4: feature_name=GO:0050911	GO:0050911.value > threshold=9.647738242579695e-06
node_442: feature_name=GO:0031056	GO:0031056.value > threshold=0.012155923061072826
node_784: feature_name=GO:0050911	GO:0050911.value <= threshold=0.9555114507675171
node_785: feature_name=GO:1902804	GO:1902804.value <= threshold=0.39919959008693695
node_786: feature_name=GO:0090069	GO:0090069.value <= threshold=0.1206773966550827
node_787: feature_name=hsa05222	hsa05222.value > threshold=0.029254859313368797
node_853: feature_name=n110	n110.value > threshold=0.0028310000197961926
node_963: feature_name=n134	n134.value <= threshold=-0.032697999849915504
node_964: feature_name=w67	w67.value > threshold=0.08818649873137474
Class: HNSC
Rules_45	passed counts:13
node_0: feature_name=GO:0019002	GO:0019002.value <= threshold=0.44260887801647186
node_1: feature_name=GO:0031052	GO:0031052.value <= threshold=1.5308658480644226
node_2: feature_name=GO:0044029	GO:0044029.value <= threshold=2.612712264060974
node_3: feature_name=GO:0061428	GO:0061428.value <= threshold=1.6541950702667236
node_4: feature_name=GO:0050911	GO:0050911.value <= threshold=9.647738242579695e-06
node_5: feature_name=GO:0006461	GO:0006461.value > threshold=0.0025558413472026587
node_93: feature_name=GO:0030277	GO:0030277.value <= threshold=1.1837461590766907
node_94: feature_name=GO:0006346	GO:0006346.value <= threshold=1.8170061111450195
node_95: feature_name=n76	n76.value <= threshold=0.002943999948911369
node_96: feature_name=GO:0016055	GO:0016055.value > threshold=0.03425486758351326
node_156: feature_name=n353	n353.value > threshold=0.012018000241369009
node_270: feature_name=GO:0021799	GO:0021799.value <= threshold=0.5185168385505676
node_271: feature_name=GO:0000165	GO:0000165.value <= threshold=1.210403323173523
Class: GBM
Rules_46	passed counts:13
node_0: feature_name=GO:0019002	GO:0019002.value <= threshold=0.44260887801647186
node_1: feature_name=GO:0031052	GO:0031052.value <= threshold=1.5308658480644226
node_2: feature_name=GO:0044029	GO:0044029.value <= threshold=2.612712264060974
node_3: feature_name=GO:0061428	GO:0061428.value <= threshold=1.6541950702667236
node_4: feature_name=GO:0050911	GO:0050911.value <= threshold=9.647738242579695e-06
node_5: feature_name=GO:0006461	GO:0006461.value > threshold=0.0025558413472026587
node_93: feature_name=GO:0030277	GO:0030277.value <= threshold=1.1837461590766907
node_94: feature_name=GO:0006346	GO:0006346.value <= threshold=1.8170061111450195
node_95: feature_name=n76	n76.value <= threshold=0.002943999948911369
node_96: feature_name=GO:0016055	GO:0016055.value <= threshold=0.03425486758351326
node_97: feature_name=n308	n308.value <= threshold=0.05376549996435642
node_98: feature_name=n500	n500.value > threshold=0.07162800058722496
node_116: feature_name=w250	w250.value > threshold=-0.26135149598121643
node_126: feature_name=GO:0031410	GO:0031410.value > threshold=0.21292828023433685
node_142: feature_name=GO:0031224	GO:0031224.value <= threshold=0.8674863874912262
node_143: feature_name=w252	w252.value > threshold=-0.06805450096726418
Class: KIRC
Rules_47	passed counts:12
node_0: feature_name=GO:0019002	GO:0019002.value <= threshold=0.44260887801647186
node_1: feature_name=GO:0031052	GO:0031052.value > threshold=1.5308658480644226
node_1165: feature_name=hsa05214	hsa05214.value <= threshold=1.511171042919159
node_1166: feature_name=GO:0042772	GO:0042772.value <= threshold=1.405928909778595
node_1167: feature_name=GO:0005507	GO:0005507.value > threshold=0.08644267916679382
node_1187: feature_name=n445	n445.value > threshold=0.03499799966812134
node_1293: feature_name=n206	n206.value > threshold=-0.00248149991966784
Class: COADREAD
Rules_48	passed counts:12
node_0: feature_name=GO:0019002	GO:0019002.value <= threshold=0.44260887801647186
node_1: feature_name=GO:0031052	GO:0031052.value <= threshold=1.5308658480644226
node_2: feature_name=GO:0044029	GO:0044029.value <= threshold=2.612712264060974
node_3: feature_name=GO:0061428	GO:0061428.value <= threshold=1.6541950702667236
node_4: feature_name=GO:0050911	GO:0050911.value > threshold=9.647738242579695e-06
node_442: feature_name=GO:0031056	GO:0031056.value > threshold=0.012155923061072826
node_784: feature_name=GO:0050911	GO:0050911.value <= threshold=0.9555114507675171
node_785: feature_name=GO:1902804	GO:1902804.value <= threshold=0.39919959008693695
node_786: feature_name=GO:0090069	GO:0090069.value <= threshold=0.1206773966550827
node_787: feature_name=hsa05222	hsa05222.value > threshold=0.029254859313368797
node_853: feature_name=n110	n110.value <= threshold=0.0028310000197961926
node_854: feature_name=n61	n61.value > threshold=0.010850000195205212
node_876: feature_name=GO:0001658	GO:0001658.value > threshold=0.5237079858779907
node_938: feature_name=n260	n260.value <= threshold=0.018484500236809254
node_939: feature_name=GO:0031295	GO:0031295.value <= threshold=1.889728844165802
Class: COADREAD
Rules_49	passed counts:12
node_0: feature_name=GO:0019002	GO:0019002.value <= threshold=0.44260887801647186
node_1: feature_name=GO:0031052	GO:0031052.value <= threshold=1.5308658480644226
node_2: feature_name=GO:0044029	GO:0044029.value <= threshold=2.612712264060974
node_3: feature_name=GO:0061428	GO:0061428.value <= threshold=1.6541950702667236
node_4: feature_name=GO:0050911	GO:0050911.value > threshold=9.647738242579695e-06
node_442: feature_name=GO:0031056	GO:0031056.value <= threshold=0.012155923061072826
node_443: feature_name=GO:0031657	GO:0031657.value <= threshold=1.5778968930244446
node_444: feature_name=GO:0050804	GO:0050804.value > threshold=0.01197261456400156
node_562: feature_name=n479	n479.value <= threshold=0.10103050246834755
node_563: feature_name=GO:0004930	GO:0004930.value <= threshold=1.3939525485038757
node_564: feature_name=GO:0044767	GO:0044767.value > threshold=0.2603907734155655
node_598: feature_name=GO:0032776	GO:0032776.value <= threshold=0.5589029490947723
node_599: feature_name=GO:0021801	GO:0021801.value <= threshold=1.1827324032783508
node_600: feature_name=n378	n378.value > threshold=-0.05305299907922745
node_610: feature_name=n444	n444.value <= threshold=-0.06549949944019318
node_611: feature_name=GO:0034333	GO:0034333.value > threshold=0.2102973461151123
node_629: feature_name=GO:0044092	GO:0044092.value <= threshold=0.35498616099357605
Class: COADREAD
Rules_50	passed counts:12
node_0: feature_name=GO:0019002	GO:0019002.value <= threshold=0.44260887801647186
node_1: feature_name=GO:0031052	GO:0031052.value <= threshold=1.5308658480644226
node_2: feature_name=GO:0044029	GO:0044029.value <= threshold=2.612712264060974
node_3: feature_name=GO:0061428	GO:0061428.value <= threshold=1.6541950702667236
node_4: feature_name=GO:0050911	GO:0050911.value <= threshold=9.647738242579695e-06
node_5: feature_name=GO:0006461	GO:0006461.value > threshold=0.0025558413472026587
node_93: feature_name=GO:0030277	GO:0030277.value <= threshold=1.1837461590766907
node_94: feature_name=GO:0006346	GO:0006346.value <= threshold=1.8170061111450195
node_95: feature_name=n76	n76.value > threshold=0.002943999948911369
node_275: feature_name=GO:0070601	GO:0070601.value > threshold=0.5473223328590393
node_405: feature_name=GO:0048514	GO:0048514.value > threshold=0.07037007063627243
node_407: feature_name=GO:0001882	GO:0001882.value > threshold=0.172247014939785
Class: UCEC
Rules_51	passed counts:12
node_0: feature_name=GO:0019002	GO:0019002.value <= threshold=0.44260887801647186
node_1: feature_name=GO:0031052	GO:0031052.value <= threshold=1.5308658480644226
node_2: feature_name=GO:0044029	GO:0044029.value <= threshold=2.612712264060974
node_3: feature_name=GO:0061428	GO:0061428.value <= threshold=1.6541950702667236
node_4: feature_name=GO:0050911	GO:0050911.value <= threshold=9.647738242579695e-06
node_5: feature_name=GO:0006461	GO:0006461.value <= threshold=0.0025558413472026587
node_6: feature_name=GO:0044092	GO:0044092.value > threshold=0.04476059600710869
node_50: feature_name=n493	n493.value > threshold=0.026771499775350094
node_58: feature_name=n384	n384.value <= threshold=-0.03503799997270107
node_59: feature_name=n293	n293.value > threshold=0.023855000734329224
node_67: feature_name=n435	n435.value > threshold=0.03376000002026558
node_75: feature_name=n413	n413.value <= threshold=-0.037885500118136406
node_76: feature_name=n22	n22.value <= threshold=0.0439590010792017
Class: KIRC
Rules_52	passed counts:11
node_0: feature_name=GO:0019002	GO:0019002.value <= threshold=0.44260887801647186
node_1: feature_name=GO:0031052	GO:0031052.value > threshold=1.5308658480644226
node_1165: feature_name=hsa05214	hsa05214.value <= threshold=1.511171042919159
node_1166: feature_name=GO:0042772	GO:0042772.value > threshold=1.405928909778595
node_1312: feature_name=GO:0007141	GO:0007141.value <= threshold=1.2595189213752747
node_1313: feature_name=GO:0031056	GO:0031056.value > threshold=0.5744103491306305
node_1323: feature_name=GO:0032101	GO:0032101.value <= threshold=1.6673882603645325
node_1324: feature_name=GO:0001508	GO:0001508.value <= threshold=1.8742843270301819
node_1325: feature_name=GO:0007399	GO:0007399.value > threshold=0.16499362885951996
node_1345: feature_name=GO:0022404	GO:0022404.value > threshold=0.16996821761131287
node_1425: feature_name=n266	n266.value <= threshold=-0.01601500017568469
node_1426: feature_name=w237	w237.value > threshold=-0.27613599598407745
node_1430: feature_name=GO:0008233	GO:0008233.value <= threshold=0.6245746165513992
Class: OV
Rules_53	passed counts:11
node_0: feature_name=GO:0019002	GO:0019002.value <= threshold=0.44260887801647186
node_1: feature_name=GO:0031052	GO:0031052.value > threshold=1.5308658480644226
node_1165: feature_name=hsa05214	hsa05214.value <= threshold=1.511171042919159
node_1166: feature_name=GO:0042772	GO:0042772.value <= threshold=1.405928909778595
node_1167: feature_name=GO:0005507	GO:0005507.value > threshold=0.08644267916679382
node_1187: feature_name=n445	n445.value <= threshold=0.03499799966812134
node_1188: feature_name=GO:0044428	GO:0044428.value > threshold=0.15810610353946686
node_1216: feature_name=GO:0090199	GO:0090199.value > threshold=0.8135712444782257
node_1242: feature_name=GO:0044424	GO:0044424.value <= threshold=0.25279374420642853
node_1243: feature_name=GO:1903844	GO:1903844.value > threshold=0.5688911378383636
node_1249: feature_name=GO:0070271	GO:0070271.value > threshold=0.42930735647678375
node_1257: feature_name=n275	n275.value > threshold=-0.0042134999530389905
Class: COADREAD
Rules_54	passed counts:11
node_0: feature_name=GO:0019002	GO:0019002.value <= threshold=0.44260887801647186
node_1: feature_name=GO:0031052	GO:0031052.value <= threshold=1.5308658480644226
node_2: feature_name=GO:0044029	GO:0044029.value <= threshold=2.612712264060974
node_3: feature_name=GO:0061428	GO:0061428.value <= threshold=1.6541950702667236
node_4: feature_name=GO:0050911	GO:0050911.value > threshold=9.647738242579695e-06
node_442: feature_name=GO:0031056	GO:0031056.value > threshold=0.012155923061072826
node_784: feature_name=GO:0050911	GO:0050911.value > threshold=0.9555114507675171
node_1060: feature_name=n413	n413.value > threshold=-0.051284000277519226
node_1100: feature_name=GO:0001569	GO:0001569.value <= threshold=0.0787336677312851
node_1101: feature_name=hsa04910	hsa04910.value > threshold=0.03211996704339981
node_1111: feature_name=GO:0032774	GO:0032774.value > threshold=0.03207357972860336
node_1113: feature_name=n328	n328.value > threshold=-0.03816649876534939
Class: LUSC
Rules_55	passed counts:11
node_0: feature_name=GO:0019002	GO:0019002.value <= threshold=0.44260887801647186
node_1: feature_name=GO:0031052	GO:0031052.value <= threshold=1.5308658480644226
node_2: feature_name=GO:0044029	GO:0044029.value <= threshold=2.612712264060974
node_3: feature_name=GO:0061428	GO:0061428.value <= threshold=1.6541950702667236
node_4: feature_name=GO:0050911	GO:0050911.value > threshold=9.647738242579695e-06
node_442: feature_name=GO:0031056	GO:0031056.value <= threshold=0.012155923061072826
node_443: feature_name=GO:0031657	GO:0031657.value <= threshold=1.5778968930244446
node_444: feature_name=GO:0050804	GO:0050804.value > threshold=0.01197261456400156
node_562: feature_name=n479	n479.value <= threshold=0.10103050246834755
node_563: feature_name=GO:0004930	GO:0004930.value <= threshold=1.3939525485038757
node_564: feature_name=GO:0044767	GO:0044767.value > threshold=0.2603907734155655
node_598: feature_name=GO:0032776	GO:0032776.value > threshold=0.5589029490947723
node_718: feature_name=GO:0016021	GO:0016021.value > threshold=0.34949976950883865
Class: HNSC
Rules_56	passed counts:11
node_0: feature_name=GO:0019002	GO:0019002.value <= threshold=0.44260887801647186
node_1: feature_name=GO:0031052	GO:0031052.value <= threshold=1.5308658480644226
node_2: feature_name=GO:0044029	GO:0044029.value <= threshold=2.612712264060974
node_3: feature_name=GO:0061428	GO:0061428.value <= threshold=1.6541950702667236
node_4: feature_name=GO:0050911	GO:0050911.value <= threshold=9.647738242579695e-06
node_5: feature_name=GO:0006461	GO:0006461.value > threshold=0.0025558413472026587
node_93: feature_name=GO:0030277	GO:0030277.value <= threshold=1.1837461590766907
node_94: feature_name=GO:0006346	GO:0006346.value <= threshold=1.8170061111450195
node_95: feature_name=n76	n76.value > threshold=0.002943999948911369
node_275: feature_name=GO:0070601	GO:0070601.value <= threshold=0.5473223328590393
node_276: feature_name=n238	n238.value <= threshold=0.0742735005915165
node_277: feature_name=n225	n225.value <= threshold=0.05840349942445755
node_278: feature_name=hsa04917	hsa04917.value <= threshold=1.0047158002853394
node_279: feature_name=n254	n254.value <= threshold=-0.017405000515282154
node_280: feature_name=n270	n270.value <= threshold=0.10562549903988838
node_281: feature_name=GO:0097479	GO:0097479.value <= threshold=1.5602783858776093
Class: KIRC
Rules_57	passed counts:11
node_0: feature_name=GO:0019002	GO:0019002.value <= threshold=0.44260887801647186
node_1: feature_name=GO:0031052	GO:0031052.value <= threshold=1.5308658480644226
node_2: feature_name=GO:0044029	GO:0044029.value <= threshold=2.612712264060974
node_3: feature_name=GO:0061428	GO:0061428.value <= threshold=1.6541950702667236
node_4: feature_name=GO:0050911	GO:0050911.value <= threshold=9.647738242579695e-06
node_5: feature_name=GO:0006461	GO:0006461.value > threshold=0.0025558413472026587
node_93: feature_name=GO:0030277	GO:0030277.value <= threshold=1.1837461590766907
node_94: feature_name=GO:0006346	GO:0006346.value <= threshold=1.8170061111450195
node_95: feature_name=n76	n76.value <= threshold=0.002943999948911369
node_96: feature_name=GO:0016055	GO:0016055.value > threshold=0.03425486758351326
node_156: feature_name=n353	n353.value <= threshold=0.012018000241369009
node_157: feature_name=w192	w192.value > threshold=-0.310294508934021
node_221: feature_name=n257	n257.value > threshold=0.012840999756008387
node_229: feature_name=n241	n241.value <= threshold=-0.057298000901937485
node_230: feature_name=n57	n57.value <= threshold=0.015711999963968992
Class: OV
Rules_58	passed counts:11
node_0: feature_name=GO:0019002	GO:0019002.value <= threshold=0.44260887801647186
node_1: feature_name=GO:0031052	GO:0031052.value <= threshold=1.5308658480644226
node_2: feature_name=GO:0044029	GO:0044029.value <= threshold=2.612712264060974
node_3: feature_name=GO:0061428	GO:0061428.value <= threshold=1.6541950702667236
node_4: feature_name=GO:0050911	GO:0050911.value <= threshold=9.647738242579695e-06
node_5: feature_name=GO:0006461	GO:0006461.value > threshold=0.0025558413472026587
node_93: feature_name=GO:0030277	GO:0030277.value <= threshold=1.1837461590766907
node_94: feature_name=GO:0006346	GO:0006346.value <= threshold=1.8170061111450195
node_95: feature_name=n76	n76.value <= threshold=0.002943999948911369
node_96: feature_name=GO:0016055	GO:0016055.value <= threshold=0.03425486758351326
node_97: feature_name=n308	n308.value <= threshold=0.05376549996435642
node_98: feature_name=n500	n500.value > threshold=0.07162800058722496
node_116: feature_name=w250	w250.value <= threshold=-0.26135149598121643
node_117: feature_name=w222	w222.value <= threshold=-0.08637600019574165
node_118: feature_name=n113	n113.value <= threshold=-0.04282050020992756
Class: BRCA
Rules_59	passed counts:11
node_0: feature_name=GO:0019002	GO:0019002.value <= threshold=0.44260887801647186
node_1: feature_name=GO:0031052	GO:0031052.value <= threshold=1.5308658480644226
node_2: feature_name=GO:0044029	GO:0044029.value <= threshold=2.612712264060974
node_3: feature_name=GO:0061428	GO:0061428.value <= threshold=1.6541950702667236
node_4: feature_name=GO:0050911	GO:0050911.value <= threshold=9.647738242579695e-06
node_5: feature_name=GO:0006461	GO:0006461.value <= threshold=0.0025558413472026587
node_6: feature_name=GO:0044092	GO:0044092.value <= threshold=0.04476059600710869
node_7: feature_name=w189	w189.value <= threshold=0.051299501210451126
node_8: feature_name=GO:0097190	GO:0097190.value <= threshold=0.13583728671073914
node_9: feature_name=GO:0044087	GO:0044087.value <= threshold=0.15841922163963318
node_10: feature_name=n13	n13.value <= threshold=0.03185799904167652
node_11: feature_name=n30	n30.value <= threshold=0.04802500084042549
Class: LAML
Rules_60	passed counts:10
node_0: feature_name=GO:0019002	GO:0019002.value <= threshold=0.44260887801647186
node_1: feature_name=GO:0031052	GO:0031052.value > threshold=1.5308658480644226
node_1165: feature_name=hsa05214	hsa05214.value > threshold=1.511171042919159
node_1493: feature_name=GO:0043560	GO:0043560.value <= threshold=1.633065402507782
node_1494: feature_name=GO:0031657	GO:0031657.value <= threshold=1.520110011100769
node_1495: feature_name=GO:0051310	GO:0051310.value <= threshold=0.865888774394989
node_1496: feature_name=w190	w190.value > threshold=0.35905349254608154
node_1510: feature_name=n387	n387.value <= threshold=-0.013395499903708696
node_1511: feature_name=GO:0042633	GO:0042633.value <= threshold=0.21441422402858734
node_1512: feature_name=n455	n455.value <= threshold=0.025527500547468662
node_1513: feature_name=w134	w134.value <= threshold=0.032928500324487686
node_1514: feature_name=GO:0097060	GO:0097060.value <= threshold=0.9984853565692902
Class: COADREAD
Rules_61	passed counts:10
node_0: feature_name=GO:0019002	GO:0019002.value <= threshold=0.44260887801647186
node_1: feature_name=GO:0031052	GO:0031052.value <= threshold=1.5308658480644226
node_2: feature_name=GO:0044029	GO:0044029.value <= threshold=2.612712264060974
node_3: feature_name=GO:0061428	GO:0061428.value <= threshold=1.6541950702667236
node_4: feature_name=GO:0050911	GO:0050911.value > threshold=9.647738242579695e-06
node_442: feature_name=GO:0031056	GO:0031056.value > threshold=0.012155923061072826
node_784: feature_name=GO:0050911	GO:0050911.value <= threshold=0.9555114507675171
node_785: feature_name=GO:1902804	GO:1902804.value <= threshold=0.39919959008693695
node_786: feature_name=GO:0090069	GO:0090069.value <= threshold=0.1206773966550827
node_787: feature_name=hsa05222	hsa05222.value > threshold=0.029254859313368797
node_853: feature_name=n110	n110.value > threshold=0.0028310000197961926
node_963: feature_name=n134	n134.value > threshold=-0.032697999849915504
node_969: feature_name=GO:0032502	GO:0032502.value <= threshold=3.2696011066436768
node_970: feature_name=GO:0005267	GO:0005267.value <= threshold=0.0600297637283802
node_971: feature_name=GO:0019318	GO:0019318.value <= threshold=0.36308737099170685
Class: HNSC
Rules_62	passed counts:10
node_0: feature_name=GO:0019002	GO:0019002.value <= threshold=0.44260887801647186
node_1: feature_name=GO:0031052	GO:0031052.value <= threshold=1.5308658480644226
node_2: feature_name=GO:0044029	GO:0044029.value <= threshold=2.612712264060974
node_3: feature_name=GO:0061428	GO:0061428.value <= threshold=1.6541950702667236
node_4: feature_name=GO:0050911	GO:0050911.value > threshold=9.647738242579695e-06
node_442: feature_name=GO:0031056	GO:0031056.value <= threshold=0.012155923061072826
node_443: feature_name=GO:0031657	GO:0031657.value <= threshold=1.5778968930244446
node_444: feature_name=GO:0050804	GO:0050804.value <= threshold=0.01197261456400156
node_445: feature_name=n8	n8.value > threshold=-0.09153800085186958
node_469: feature_name=GO:0098655	GO:0098655.value <= threshold=1.5729240775108337
node_470: feature_name=n266	n266.value > threshold=-0.010881000198423862
node_506: feature_name=GO:0015276	GO:0015276.value > threshold=0.4701277017593384
node_546: feature_name=n170	n170.value <= threshold=0.04421300068497658
node_547: feature_name=w78	w78.value <= threshold=0.2675800025463104
Class: GBM
Rules_63	passed counts:10
node_0: feature_name=GO:0019002	GO:0019002.value <= threshold=0.44260887801647186
node_1: feature_name=GO:0031052	GO:0031052.value <= threshold=1.5308658480644226
node_2: feature_name=GO:0044029	GO:0044029.value <= threshold=2.612712264060974
node_3: feature_name=GO:0061428	GO:0061428.value <= threshold=1.6541950702667236
node_4: feature_name=GO:0050911	GO:0050911.value > threshold=9.647738242579695e-06
node_442: feature_name=GO:0031056	GO:0031056.value <= threshold=0.012155923061072826
node_443: feature_name=GO:0031657	GO:0031657.value <= threshold=1.5778968930244446
node_444: feature_name=GO:0050804	GO:0050804.value <= threshold=0.01197261456400156
node_445: feature_name=n8	n8.value > threshold=-0.09153800085186958
node_469: feature_name=GO:0098655	GO:0098655.value <= threshold=1.5729240775108337
node_470: feature_name=n266	n266.value <= threshold=-0.010881000198423862
node_471: feature_name=w156	w156.value > threshold=-0.18547500669956207
node_499: feature_name=GO:0040012	GO:0040012.value > threshold=0.14159005880355835
node_503: feature_name=w119	w119.value > threshold=-0.11090650036931038
Class: BRCA
Rules_64	passed counts:10
node_0: feature_name=GO:0019002	GO:0019002.value <= threshold=0.44260887801647186
node_1: feature_name=GO:0031052	GO:0031052.value <= threshold=1.5308658480644226
node_2: feature_name=GO:0044029	GO:0044029.value <= threshold=2.612712264060974
node_3: feature_name=GO:0061428	GO:0061428.value <= threshold=1.6541950702667236
node_4: feature_name=GO:0050911	GO:0050911.value <= threshold=9.647738242579695e-06
node_5: feature_name=GO:0006461	GO:0006461.value > threshold=0.0025558413472026587
node_93: feature_name=GO:0030277	GO:0030277.value <= threshold=1.1837461590766907
node_94: feature_name=GO:0006346	GO:0006346.value <= threshold=1.8170061111450195
node_95: feature_name=n76	n76.value > threshold=0.002943999948911369
node_275: feature_name=GO:0070601	GO:0070601.value <= threshold=0.5473223328590393
node_276: feature_name=n238	n238.value > threshold=0.0742735005915165
node_326: feature_name=n90	n90.value > threshold=-0.01138749998062849
node_340: feature_name=GO:0006928	GO:0006928.value > threshold=0.14370637387037277
node_350: feature_name=GO:0016567	GO:0016567.value > threshold=0.21442794799804688
node_378: feature_name=n371	n371.value > threshold=0.0010474999726284295
node_386: feature_name=w48	w48.value > threshold=0.008460000157356262
node_394: feature_name=GO:0032101	GO:0032101.value <= threshold=0.3942917287349701
Class: BRCA
Rules_65	passed counts:10
node_0: feature_name=GO:0019002	GO:0019002.value <= threshold=0.44260887801647186
node_1: feature_name=GO:0031052	GO:0031052.value <= threshold=1.5308658480644226
node_2: feature_name=GO:0044029	GO:0044029.value <= threshold=2.612712264060974
node_3: feature_name=GO:0061428	GO:0061428.value <= threshold=1.6541950702667236
node_4: feature_name=GO:0050911	GO:0050911.value <= threshold=9.647738242579695e-06
node_5: feature_name=GO:0006461	GO:0006461.value > threshold=0.0025558413472026587
node_93: feature_name=GO:0030277	GO:0030277.value <= threshold=1.1837461590766907
node_94: feature_name=GO:0006346	GO:0006346.value <= threshold=1.8170061111450195
node_95: feature_name=n76	n76.value > threshold=0.002943999948911369
node_275: feature_name=GO:0070601	GO:0070601.value <= threshold=0.5473223328590393
node_276: feature_name=n238	n238.value > threshold=0.0742735005915165
node_326: feature_name=n90	n90.value <= threshold=-0.01138749998062849
node_327: feature_name=GO:0051092	GO:0051092.value <= threshold=0.3850674629211426
node_328: feature_name=GO:0072359	GO:0072359.value <= threshold=0.543662041425705
node_329: feature_name=n281	n281.value > threshold=0.049463000148534775
Class: LAML
Rules_66	passed counts:10
node_0: feature_name=GO:0019002	GO:0019002.value <= threshold=0.44260887801647186
node_1: feature_name=GO:0031052	GO:0031052.value <= threshold=1.5308658480644226
node_2: feature_name=GO:0044029	GO:0044029.value <= threshold=2.612712264060974
node_3: feature_name=GO:0061428	GO:0061428.value <= threshold=1.6541950702667236
node_4: feature_name=GO:0050911	GO:0050911.value <= threshold=9.647738242579695e-06
node_5: feature_name=GO:0006461	GO:0006461.value > threshold=0.0025558413472026587
node_93: feature_name=GO:0030277	GO:0030277.value <= threshold=1.1837461590766907
node_94: feature_name=GO:0006346	GO:0006346.value <= threshold=1.8170061111450195
node_95: feature_name=n76	n76.value <= threshold=0.002943999948911369
node_96: feature_name=GO:0016055	GO:0016055.value > threshold=0.03425486758351326
node_156: feature_name=n353	n353.value <= threshold=0.012018000241369009
node_157: feature_name=w192	w192.value > threshold=-0.310294508934021
node_221: feature_name=n257	n257.value <= threshold=0.012840999756008387
node_222: feature_name=n330	n330.value <= threshold=0.05131549946963787
node_223: feature_name=n466	n466.value > threshold=-0.09375150129199028
Class: KIRC
Rules_67	passed counts:10
node_0: feature_name=GO:0019002	GO:0019002.value <= threshold=0.44260887801647186
node_1: feature_name=GO:0031052	GO:0031052.value <= threshold=1.5308658480644226
node_2: feature_name=GO:0044029	GO:0044029.value <= threshold=2.612712264060974
node_3: feature_name=GO:0061428	GO:0061428.value <= threshold=1.6541950702667236
node_4: feature_name=GO:0050911	GO:0050911.value <= threshold=9.647738242579695e-06
node_5: feature_name=GO:0006461	GO:0006461.value > threshold=0.0025558413472026587
node_93: feature_name=GO:0030277	GO:0030277.value <= threshold=1.1837461590766907
node_94: feature_name=GO:0006346	GO:0006346.value <= threshold=1.8170061111450195
node_95: feature_name=n76	n76.value <= threshold=0.002943999948911369
node_96: feature_name=GO:0016055	GO:0016055.value <= threshold=0.03425486758351326
node_97: feature_name=n308	n308.value > threshold=0.05376549996435642
node_149: feature_name=n407	n407.value <= threshold=0.05760500021278858
Class: LAML
Rules_68	passed counts:9
node_0: feature_name=GO:0019002	GO:0019002.value > threshold=0.44260887801647186
node_1592: feature_name=GO:0019002	GO:0019002.value > threshold=1.837906301021576
node_1624: feature_name=GO:0044028	GO:0044028.value <= threshold=2.6347100734710693
node_1625: feature_name=GO:0019002	GO:0019002.value > threshold=2.587051510810852
node_1665: feature_name=GO:0030054	GO:0030054.value <= threshold=1.0326414704322815
node_1666: feature_name=w32	w32.value <= threshold=0.14372699707746506
Class: LAML
Rules_69	passed counts:9
node_0: feature_name=GO:0019002	GO:0019002.value <= threshold=0.44260887801647186
node_1: feature_name=GO:0031052	GO:0031052.value <= threshold=1.5308658480644226
node_2: feature_name=GO:0044029	GO:0044029.value > threshold=2.612712264060974
node_1138: feature_name=GO:0035112	GO:0035112.value <= threshold=0.8113309741020203
node_1139: feature_name=GO:1901800	GO:1901800.value <= threshold=1.6445645093917847
node_1140: feature_name=GO:0051251	GO:0051251.value <= threshold=0.49030888080596924
node_1141: feature_name=GO:0033157	GO:0033157.value <= threshold=0.13524845242500305
node_1142: feature_name=n450	n450.value > threshold=-0.00648199999704957
Class: BRCA
Rules_70	passed counts:9
node_0: feature_name=GO:0019002	GO:0019002.value <= threshold=0.44260887801647186
node_1: feature_name=GO:0031052	GO:0031052.value <= threshold=1.5308658480644226
node_2: feature_name=GO:0044029	GO:0044029.value <= threshold=2.612712264060974
node_3: feature_name=GO:0061428	GO:0061428.value <= threshold=1.6541950702667236
node_4: feature_name=GO:0050911	GO:0050911.value > threshold=9.647738242579695e-06
node_442: feature_name=GO:0031056	GO:0031056.value > threshold=0.012155923061072826
node_784: feature_name=GO:0050911	GO:0050911.value <= threshold=0.9555114507675171
node_785: feature_name=GO:1902804	GO:1902804.value <= threshold=0.39919959008693695
node_786: feature_name=GO:0090069	GO:0090069.value <= threshold=0.1206773966550827
node_787: feature_name=hsa05222	hsa05222.value > threshold=0.029254859313368797
node_853: feature_name=n110	n110.value <= threshold=0.0028310000197961926
node_854: feature_name=n61	n61.value > threshold=0.010850000195205212
node_876: feature_name=GO:0001658	GO:0001658.value <= threshold=0.5237079858779907
node_877: feature_name=GO:0019661	GO:0019661.value <= threshold=1.8170058131217957
node_878: feature_name=GO:0043465	GO:0043465.value > threshold=0.938182920217514
node_912: feature_name=GO:0035176	GO:0035176.value <= threshold=0.2707503139972687
node_913: feature_name=GO:0098660	GO:0098660.value > threshold=0.6433568298816681
node_917: feature_name=GO:0044275	GO:0044275.value > threshold=0.3302633464336395
node_919: feature_name=GO:0043227	GO:0043227.value > threshold=0.038102906197309494
Class: LUSC
Rules_71	passed counts:9
node_0: feature_name=GO:0019002	GO:0019002.value <= threshold=0.44260887801647186
node_1: feature_name=GO:0031052	GO:0031052.value <= threshold=1.5308658480644226
node_2: feature_name=GO:0044029	GO:0044029.value <= threshold=2.612712264060974
node_3: feature_name=GO:0061428	GO:0061428.value <= threshold=1.6541950702667236
node_4: feature_name=GO:0050911	GO:0050911.value > threshold=9.647738242579695e-06
node_442: feature_name=GO:0031056	GO:0031056.value > threshold=0.012155923061072826
node_784: feature_name=GO:0050911	GO:0050911.value <= threshold=0.9555114507675171
node_785: feature_name=GO:1902804	GO:1902804.value <= threshold=0.39919959008693695
node_786: feature_name=GO:0090069	GO:0090069.value <= threshold=0.1206773966550827
node_787: feature_name=hsa05222	hsa05222.value > threshold=0.029254859313368797
node_853: feature_name=n110	n110.value <= threshold=0.0028310000197961926
node_854: feature_name=n61	n61.value > threshold=0.010850000195205212
node_876: feature_name=GO:0001658	GO:0001658.value <= threshold=0.5237079858779907
node_877: feature_name=GO:0019661	GO:0019661.value <= threshold=1.8170058131217957
node_878: feature_name=GO:0043465	GO:0043465.value <= threshold=0.938182920217514
node_879: feature_name=n243	n243.value > threshold=0.002851500059477985
node_901: feature_name=GO:0098742	GO:0098742.value > threshold=0.9895021021366119
Class: COADREAD
Rules_72	passed counts:9
node_0: feature_name=GO:0019002	GO:0019002.value <= threshold=0.44260887801647186
node_1: feature_name=GO:0031052	GO:0031052.value <= threshold=1.5308658480644226
node_2: feature_name=GO:0044029	GO:0044029.value <= threshold=2.612712264060974
node_3: feature_name=GO:0061428	GO:0061428.value <= threshold=1.6541950702667236
node_4: feature_name=GO:0050911	GO:0050911.value > threshold=9.647738242579695e-06
node_442: feature_name=GO:0031056	GO:0031056.value > threshold=0.012155923061072826
node_784: feature_name=GO:0050911	GO:0050911.value <= threshold=0.9555114507675171
node_785: feature_name=GO:1902804	GO:1902804.value <= threshold=0.39919959008693695
node_786: feature_name=GO:0090069	GO:0090069.value <= threshold=0.1206773966550827
node_787: feature_name=hsa05222	hsa05222.value <= threshold=0.029254859313368797
node_788: feature_name=w235	w235.value <= threshold=0.07797800004482269
node_789: feature_name=GO:0060788	GO:0060788.value <= threshold=1.3469486832618713
node_790: feature_name=n99	n99.value > threshold=0.029147000052034855
node_802: feature_name=n419	n419.value > threshold=-0.0438499990850687
node_804: feature_name=GO:0001508	GO:0001508.value <= threshold=1.1710909008979797
node_805: feature_name=n262	n262.value <= threshold=0.09681599959731102
node_806: feature_name=GO:0044431	GO:0044431.value > threshold=0.3968949466943741
node_832: feature_name=GO:0060322	GO:0060322.value <= threshold=0.4617537707090378
node_833: feature_name=GO:0016070	GO:0016070.value > threshold=0.15659137070178986
Class: HNSC
Rules_73	passed counts:9
node_0: feature_name=GO:0019002	GO:0019002.value <= threshold=0.44260887801647186
node_1: feature_name=GO:0031052	GO:0031052.value <= threshold=1.5308658480644226
node_2: feature_name=GO:0044029	GO:0044029.value <= threshold=2.612712264060974
node_3: feature_name=GO:0061428	GO:0061428.value <= threshold=1.6541950702667236
node_4: feature_name=GO:0050911	GO:0050911.value > threshold=9.647738242579695e-06
node_442: feature_name=GO:0031056	GO:0031056.value > threshold=0.012155923061072826
node_784: feature_name=GO:0050911	GO:0050911.value <= threshold=0.9555114507675171
node_785: feature_name=GO:1902804	GO:1902804.value <= threshold=0.39919959008693695
node_786: feature_name=GO:0090069	GO:0090069.value <= threshold=0.1206773966550827
node_787: feature_name=hsa05222	hsa05222.value <= threshold=0.029254859313368797
node_788: feature_name=w235	w235.value <= threshold=0.07797800004482269
node_789: feature_name=GO:0060788	GO:0060788.value <= threshold=1.3469486832618713
node_790: feature_name=n99	n99.value <= threshold=0.029147000052034855
node_791: feature_name=GO:0005886	GO:0005886.value <= threshold=0.5150677263736725
Class: KIRC
Rules_74	passed counts:9
node_0: feature_name=GO:0019002	GO:0019002.value <= threshold=0.44260887801647186
node_1: feature_name=GO:0031052	GO:0031052.value <= threshold=1.5308658480644226
node_2: feature_name=GO:0044029	GO:0044029.value <= threshold=2.612712264060974
node_3: feature_name=GO:0061428	GO:0061428.value <= threshold=1.6541950702667236
node_4: feature_name=GO:0050911	GO:0050911.value > threshold=9.647738242579695e-06
node_442: feature_name=GO:0031056	GO:0031056.value <= threshold=0.012155923061072826
node_443: feature_name=GO:0031657	GO:0031657.value <= threshold=1.5778968930244446
node_444: feature_name=GO:0050804	GO:0050804.value > threshold=0.01197261456400156
node_562: feature_name=n479	n479.value <= threshold=0.10103050246834755
node_563: feature_name=GO:0004930	GO:0004930.value <= threshold=1.3939525485038757
node_564: feature_name=GO:0044767	GO:0044767.value > threshold=0.2603907734155655
node_598: feature_name=GO:0032776	GO:0032776.value <= threshold=0.5589029490947723
node_599: feature_name=GO:0021801	GO:0021801.value <= threshold=1.1827324032783508
node_600: feature_name=n378	n378.value <= threshold=-0.05305299907922745
node_601: feature_name=GO:0051130	GO:0051130.value <= threshold=0.5693472623825073
node_602: feature_name=GO:0044422	GO:0044422.value > threshold=0.0724890548735857
Class: BRCA
Rules_75	passed counts:8
node_0: feature_name=GO:0019002	GO:0019002.value <= threshold=0.44260887801647186
node_1: feature_name=GO:0031052	GO:0031052.value > threshold=1.5308658480644226
node_1165: feature_name=hsa05214	hsa05214.value <= threshold=1.511171042919159
node_1166: feature_name=GO:0042772	GO:0042772.value > threshold=1.405928909778595
node_1312: feature_name=GO:0007141	GO:0007141.value <= threshold=1.2595189213752747
node_1313: feature_name=GO:0031056	GO:0031056.value > threshold=0.5744103491306305
node_1323: feature_name=GO:0032101	GO:0032101.value <= threshold=1.6673882603645325
node_1324: feature_name=GO:0001508	GO:0001508.value <= threshold=1.8742843270301819
node_1325: feature_name=GO:0007399	GO:0007399.value > threshold=0.16499362885951996
node_1345: feature_name=GO:0022404	GO:0022404.value <= threshold=0.16996821761131287
node_1346: feature_name=GO:0005218	GO:0005218.value <= threshold=1.6579931378364563
node_1347: feature_name=GO:0072331	GO:0072331.value <= threshold=0.5463034808635712
node_1348: feature_name=GO:0007267	GO:0007267.value <= threshold=0.29706886410713196
node_1349: feature_name=w36	w36.value > threshold=-0.13762399554252625
Class: OV
Rules_76	passed counts:8
node_0: feature_name=GO:0019002	GO:0019002.value <= threshold=0.44260887801647186
node_1: feature_name=GO:0031052	GO:0031052.value > threshold=1.5308658480644226
node_1165: feature_name=hsa05214	hsa05214.value <= threshold=1.511171042919159
node_1166: feature_name=GO:0042772	GO:0042772.value > threshold=1.405928909778595
node_1312: feature_name=GO:0007141	GO:0007141.value <= threshold=1.2595189213752747
node_1313: feature_name=GO:0031056	GO:0031056.value <= threshold=0.5744103491306305
node_1314: feature_name=n325	n325.value > threshold=0.028080999851226807
node_1316: feature_name=w146	w146.value > threshold=0.439533993601799
Class: HNSC
Rules_77	passed counts:8
node_0: feature_name=GO:0019002	GO:0019002.value <= threshold=0.44260887801647186
node_1: feature_name=GO:0031052	GO:0031052.value <= threshold=1.5308658480644226
node_2: feature_name=GO:0044029	GO:0044029.value <= threshold=2.612712264060974
node_3: feature_name=GO:0061428	GO:0061428.value <= threshold=1.6541950702667236
node_4: feature_name=GO:0050911	GO:0050911.value > threshold=9.647738242579695e-06
node_442: feature_name=GO:0031056	GO:0031056.value > threshold=0.012155923061072826
node_784: feature_name=GO:0050911	GO:0050911.value <= threshold=0.9555114507675171
node_785: feature_name=GO:1902804	GO:1902804.value > threshold=0.39919959008693695
node_1045: feature_name=n263	n263.value <= threshold=-0.09578999876976013
node_1046: feature_name=n328	n328.value <= threshold=-0.020179999992251396
Class: LUAD
Rules_78	passed counts:8
node_0: feature_name=GO:0019002	GO:0019002.value <= threshold=0.44260887801647186
node_1: feature_name=GO:0031052	GO:0031052.value <= threshold=1.5308658480644226
node_2: feature_name=GO:0044029	GO:0044029.value <= threshold=2.612712264060974
node_3: feature_name=GO:0061428	GO:0061428.value <= threshold=1.6541950702667236
node_4: feature_name=GO:0050911	GO:0050911.value > threshold=9.647738242579695e-06
node_442: feature_name=GO:0031056	GO:0031056.value > threshold=0.012155923061072826
node_784: feature_name=GO:0050911	GO:0050911.value <= threshold=0.9555114507675171
node_785: feature_name=GO:1902804	GO:1902804.value <= threshold=0.39919959008693695
node_786: feature_name=GO:0090069	GO:0090069.value <= threshold=0.1206773966550827
node_787: feature_name=hsa05222	hsa05222.value > threshold=0.029254859313368797
node_853: feature_name=n110	n110.value > threshold=0.0028310000197961926
node_963: feature_name=n134	n134.value > threshold=-0.032697999849915504
node_969: feature_name=GO:0032502	GO:0032502.value > threshold=3.2696011066436768
node_1013: feature_name=GO:0070486	GO:0070486.value > threshold=0.3188374936580658
Class: UCEC
Rules_79	passed counts:8
node_0: feature_name=GO:0019002	GO:0019002.value <= threshold=0.44260887801647186
node_1: feature_name=GO:0031052	GO:0031052.value <= threshold=1.5308658480644226
node_2: feature_name=GO:0044029	GO:0044029.value <= threshold=2.612712264060974
node_3: feature_name=GO:0061428	GO:0061428.value <= threshold=1.6541950702667236
node_4: feature_name=GO:0050911	GO:0050911.value > threshold=9.647738242579695e-06
node_442: feature_name=GO:0031056	GO:0031056.value > threshold=0.012155923061072826
node_784: feature_name=GO:0050911	GO:0050911.value <= threshold=0.9555114507675171
node_785: feature_name=GO:1902804	GO:1902804.value <= threshold=0.39919959008693695
node_786: feature_name=GO:0090069	GO:0090069.value <= threshold=0.1206773966550827
node_787: feature_name=hsa05222	hsa05222.value <= threshold=0.029254859313368797
node_788: feature_name=w235	w235.value <= threshold=0.07797800004482269
node_789: feature_name=GO:0060788	GO:0060788.value <= threshold=1.3469486832618713
node_790: feature_name=n99	n99.value > threshold=0.029147000052034855
node_802: feature_name=n419	n419.value > threshold=-0.0438499990850687
node_804: feature_name=GO:0001508	GO:0001508.value <= threshold=1.1710909008979797
node_805: feature_name=n262	n262.value <= threshold=0.09681599959731102
node_806: feature_name=GO:0044431	GO:0044431.value <= threshold=0.3968949466943741
node_807: feature_name=n380	n380.value > threshold=0.05795999988913536
node_811: feature_name=GO:0040007	GO:0040007.value <= threshold=0.19509177654981613
node_812: feature_name=GO:0032880	GO:0032880.value <= threshold=0.3711191713809967
Class: OV
Rules_80	passed counts:8
node_0: feature_name=GO:0019002	GO:0019002.value <= threshold=0.44260887801647186
node_1: feature_name=GO:0031052	GO:0031052.value <= threshold=1.5308658480644226
node_2: feature_name=GO:0044029	GO:0044029.value <= threshold=2.612712264060974
node_3: feature_name=GO:0061428	GO:0061428.value <= threshold=1.6541950702667236
node_4: feature_name=GO:0050911	GO:0050911.value > threshold=9.647738242579695e-06
node_442: feature_name=GO:0031056	GO:0031056.value <= threshold=0.012155923061072826
node_443: feature_name=GO:0031657	GO:0031657.value <= threshold=1.5778968930244446
node_444: feature_name=GO:0050804	GO:0050804.value > threshold=0.01197261456400156
node_562: feature_name=n479	n479.value <= threshold=0.10103050246834755
node_563: feature_name=GO:0004930	GO:0004930.value > threshold=1.3939525485038757
node_725: feature_name=GO:1901215	GO:1901215.value > threshold=0.18657370656728745
node_727: feature_name=GO:0007272	GO:0007272.value > threshold=0.0970870777964592
Class: LUSC
Rules_81	passed counts:8
node_0: feature_name=GO:0019002	GO:0019002.value <= threshold=0.44260887801647186
node_1: feature_name=GO:0031052	GO:0031052.value <= threshold=1.5308658480644226
node_2: feature_name=GO:0044029	GO:0044029.value <= threshold=2.612712264060974
node_3: feature_name=GO:0061428	GO:0061428.value <= threshold=1.6541950702667236
node_4: feature_name=GO:0050911	GO:0050911.value > threshold=9.647738242579695e-06
node_442: feature_name=GO:0031056	GO:0031056.value <= threshold=0.012155923061072826
node_443: feature_name=GO:0031657	GO:0031657.value <= threshold=1.5778968930244446
node_444: feature_name=GO:0050804	GO:0050804.value > threshold=0.01197261456400156
node_562: feature_name=n479	n479.value <= threshold=0.10103050246834755
node_563: feature_name=GO:0004930	GO:0004930.value <= threshold=1.3939525485038757
node_564: feature_name=GO:0044767	GO:0044767.value > threshold=0.2603907734155655
node_598: feature_name=GO:0032776	GO:0032776.value <= threshold=0.5589029490947723
node_599: feature_name=GO:0021801	GO:0021801.value > threshold=1.1827324032783508
node_713: feature_name=GO:0030182	GO:0030182.value <= threshold=2.185428261756897
Class: BRCA
Rules_82	passed counts:8
node_0: feature_name=GO:0019002	GO:0019002.value <= threshold=0.44260887801647186
node_1: feature_name=GO:0031052	GO:0031052.value <= threshold=1.5308658480644226
node_2: feature_name=GO:0044029	GO:0044029.value <= threshold=2.612712264060974
node_3: feature_name=GO:0061428	GO:0061428.value <= threshold=1.6541950702667236
node_4: feature_name=GO:0050911	GO:0050911.value <= threshold=9.647738242579695e-06
node_5: feature_name=GO:0006461	GO:0006461.value > threshold=0.0025558413472026587
node_93: feature_name=GO:0030277	GO:0030277.value <= threshold=1.1837461590766907
node_94: feature_name=GO:0006346	GO:0006346.value <= threshold=1.8170061111450195
node_95: feature_name=n76	n76.value <= threshold=0.002943999948911369
node_96: feature_name=GO:0016055	GO:0016055.value > threshold=0.03425486758351326
node_156: feature_name=n353	n353.value <= threshold=0.012018000241369009
node_157: feature_name=w192	w192.value <= threshold=-0.310294508934021
node_158: feature_name=GO:0006915	GO:0006915.value <= threshold=0.20105624943971634
node_159: feature_name=n158	n158.value > threshold=-0.015678999945521355
node_179: feature_name=n328	n328.value > threshold=-0.02482450008392334
Class: BRCA
Rules_83	passed counts:7
node_0: feature_name=GO:0019002	GO:0019002.value > threshold=0.44260887801647186
node_1592: feature_name=GO:0019002	GO:0019002.value > threshold=1.837906301021576
node_1624: feature_name=GO:0044028	GO:0044028.value <= threshold=2.6347100734710693
node_1625: feature_name=GO:0019002	GO:0019002.value <= threshold=2.587051510810852
node_1626: feature_name=hsa05215	hsa05215.value > threshold=0.49044638872146606
node_1634: feature_name=n361	n361.value > threshold=0.0004270000044925837
node_1646: feature_name=GO:0045671	GO:0045671.value > threshold=1.0868683457374573
node_1658: feature_name=n145	n145.value <= threshold=-0.11609850078821182
node_1659: feature_name=GO:0030030	GO:0030030.value <= threshold=1.702938973903656
Class: COADREAD
Rules_84	passed counts:7
node_0: feature_name=GO:0019002	GO:0019002.value > threshold=0.44260887801647186
node_1592: feature_name=GO:0019002	GO:0019002.value <= threshold=1.837906301021576
node_1593: feature_name=n6	n6.value <= threshold=0.03690900094807148
node_1594: feature_name=GO:0031226	GO:0031226.value <= threshold=1.2442941069602966
node_1595: feature_name=GO:1903845	GO:1903845.value > threshold=0.5970458984375
node_1605: feature_name=GO:0016032	GO:0016032.value <= threshold=0.5579104125499725
Class: COADREAD
Rules_85	passed counts:7
node_0: feature_name=GO:0019002	GO:0019002.value <= threshold=0.44260887801647186
node_1: feature_name=GO:0031052	GO:0031052.value > threshold=1.5308658480644226
node_1165: feature_name=hsa05214	hsa05214.value > threshold=1.511171042919159
node_1493: feature_name=GO:0043560	GO:0043560.value <= threshold=1.633065402507782
node_1494: feature_name=GO:0031657	GO:0031657.value <= threshold=1.520110011100769
node_1495: feature_name=GO:0051310	GO:0051310.value <= threshold=0.865888774394989
node_1496: feature_name=w190	w190.value <= threshold=0.35905349254608154
node_1497: feature_name=GO:1901991	GO:1901991.value <= threshold=0.4439539909362793
Class: HNSC
Rules_86	passed counts:7
node_0: feature_name=GO:0019002	GO:0019002.value <= threshold=0.44260887801647186
node_1: feature_name=GO:0031052	GO:0031052.value > threshold=1.5308658480644226
node_1165: feature_name=hsa05214	hsa05214.value <= threshold=1.511171042919159
node_1166: feature_name=GO:0042772	GO:0042772.value > threshold=1.405928909778595
node_1312: feature_name=GO:0007141	GO:0007141.value <= threshold=1.2595189213752747
node_1313: feature_name=GO:0031056	GO:0031056.value > threshold=0.5744103491306305
node_1323: feature_name=GO:0032101	GO:0032101.value > threshold=1.6673882603645325
node_1467: feature_name=w39	w39.value > threshold=-0.0965460017323494
Class: BRCA
Rules_87	passed counts:7
node_0: feature_name=GO:0019002	GO:0019002.value <= threshold=0.44260887801647186
node_1: feature_name=GO:0031052	GO:0031052.value > threshold=1.5308658480644226
node_1165: feature_name=hsa05214	hsa05214.value <= threshold=1.511171042919159
node_1166: feature_name=GO:0042772	GO:0042772.value > threshold=1.405928909778595
node_1312: feature_name=GO:0007141	GO:0007141.value <= threshold=1.2595189213752747
node_1313: feature_name=GO:0031056	GO:0031056.value > threshold=0.5744103491306305
node_1323: feature_name=GO:0032101	GO:0032101.value <= threshold=1.6673882603645325
node_1324: feature_name=GO:0001508	GO:0001508.value <= threshold=1.8742843270301819
node_1325: feature_name=GO:0007399	GO:0007399.value > threshold=0.16499362885951996
node_1345: feature_name=GO:0022404	GO:0022404.value > threshold=0.16996821761131287
node_1425: feature_name=n266	n266.value > threshold=-0.01601500017568469
node_1433: feature_name=n298	n298.value > threshold=-0.021350999362766743
node_1455: feature_name=GO:0019899	GO:0019899.value <= threshold=0.8016439974308014
Class: BRCA
Rules_88	passed counts:7
node_0: feature_name=GO:0019002	GO:0019002.value <= threshold=0.44260887801647186
node_1: feature_name=GO:0031052	GO:0031052.value > threshold=1.5308658480644226
node_1165: feature_name=hsa05214	hsa05214.value <= threshold=1.511171042919159
node_1166: feature_name=GO:0042772	GO:0042772.value <= threshold=1.405928909778595
node_1167: feature_name=GO:0005507	GO:0005507.value > threshold=0.08644267916679382
node_1187: feature_name=n445	n445.value <= threshold=0.03499799966812134
node_1188: feature_name=GO:0044428	GO:0044428.value > threshold=0.15810610353946686
node_1216: feature_name=GO:0090199	GO:0090199.value > threshold=0.8135712444782257
node_1242: feature_name=GO:0044424	GO:0044424.value <= threshold=0.25279374420642853
node_1243: feature_name=GO:1903844	GO:1903844.value <= threshold=0.5688911378383636
node_1244: feature_name=GO:0045944	GO:0045944.value <= threshold=0.6831457614898682
Class: HNSC
Rules_89	passed counts:7
node_0: feature_name=GO:0019002	GO:0019002.value <= threshold=0.44260887801647186
node_1: feature_name=GO:0031052	GO:0031052.value > threshold=1.5308658480644226
node_1165: feature_name=hsa05214	hsa05214.value <= threshold=1.511171042919159
node_1166: feature_name=GO:0042772	GO:0042772.value <= threshold=1.405928909778595
node_1167: feature_name=GO:0005507	GO:0005507.value > threshold=0.08644267916679382
node_1187: feature_name=n445	n445.value <= threshold=0.03499799966812134
node_1188: feature_name=GO:0044428	GO:0044428.value <= threshold=0.15810610353946686
node_1189: feature_name=n29	n29.value > threshold=0.04300150088965893
node_1195: feature_name=GO:0046824	GO:0046824.value <= threshold=0.020997175946831703
node_1196: feature_name=GO:0007600	GO:0007600.value <= threshold=0.6718952655792236
node_1197: feature_name=n374	n374.value <= threshold=0.05575050041079521
Class: OV
Rules_90	passed counts:7
node_0: feature_name=GO:0019002	GO:0019002.value <= threshold=0.44260887801647186
node_1: feature_name=GO:0031052	GO:0031052.value <= threshold=1.5308658480644226
node_2: feature_name=GO:0044029	GO:0044029.value <= threshold=2.612712264060974
node_3: feature_name=GO:0061428	GO:0061428.value <= threshold=1.6541950702667236
node_4: feature_name=GO:0050911	GO:0050911.value > threshold=9.647738242579695e-06
node_442: feature_name=GO:0031056	GO:0031056.value > threshold=0.012155923061072826
node_784: feature_name=GO:0050911	GO:0050911.value <= threshold=0.9555114507675171
node_785: feature_name=GO:1902804	GO:1902804.value <= threshold=0.39919959008693695
node_786: feature_name=GO:0090069	GO:0090069.value <= threshold=0.1206773966550827
node_787: feature_name=hsa05222	hsa05222.value > threshold=0.029254859313368797
node_853: feature_name=n110	n110.value > threshold=0.0028310000197961926
node_963: feature_name=n134	n134.value > threshold=-0.032697999849915504
node_969: feature_name=GO:0032502	GO:0032502.value <= threshold=3.2696011066436768
node_970: feature_name=GO:0005267	GO:0005267.value > threshold=0.0600297637283802
node_988: feature_name=GO:0046031	GO:0046031.value > threshold=0.38890886306762695
node_1000: feature_name=w23	w23.value <= threshold=0.025092500261962414
node_1001: feature_name=GO:0071407	GO:0071407.value <= threshold=0.7213866114616394
Class: HNSC
Rules_91	passed counts:7
node_0: feature_name=GO:0019002	GO:0019002.value <= threshold=0.44260887801647186
node_1: feature_name=GO:0031052	GO:0031052.value <= threshold=1.5308658480644226
node_2: feature_name=GO:0044029	GO:0044029.value <= threshold=2.612712264060974
node_3: feature_name=GO:0061428	GO:0061428.value <= threshold=1.6541950702667236
node_4: feature_name=GO:0050911	GO:0050911.value > threshold=9.647738242579695e-06
node_442: feature_name=GO:0031056	GO:0031056.value > threshold=0.012155923061072826
node_784: feature_name=GO:0050911	GO:0050911.value <= threshold=0.9555114507675171
node_785: feature_name=GO:1902804	GO:1902804.value <= threshold=0.39919959008693695
node_786: feature_name=GO:0090069	GO:0090069.value <= threshold=0.1206773966550827
node_787: feature_name=hsa05222	hsa05222.value > threshold=0.029254859313368797
node_853: feature_name=n110	n110.value <= threshold=0.0028310000197961926
node_854: feature_name=n61	n61.value > threshold=0.010850000195205212
node_876: feature_name=GO:0001658	GO:0001658.value > threshold=0.5237079858779907
node_938: feature_name=n260	n260.value > threshold=0.018484500236809254
node_942: feature_name=GO:0097480	GO:0097480.value > threshold=0.10728578269481659
node_946: feature_name=GO:1901800	GO:1901800.value <= threshold=0.18478315323591232
node_947: feature_name=GO:0051972	GO:0051972.value <= threshold=0.14770695567131042
node_948: feature_name=hsa05214	hsa05214.value > threshold=0.5157070457935333
node_950: feature_name=n432	n432.value <= threshold=-0.02829849999397993
Class: HNSC
Rules_92	passed counts:7
node_0: feature_name=GO:0019002	GO:0019002.value <= threshold=0.44260887801647186
node_1: feature_name=GO:0031052	GO:0031052.value <= threshold=1.5308658480644226
node_2: feature_name=GO:0044029	GO:0044029.value <= threshold=2.612712264060974
node_3: feature_name=GO:0061428	GO:0061428.value <= threshold=1.6541950702667236
node_4: feature_name=GO:0050911	GO:0050911.value > threshold=9.647738242579695e-06
node_442: feature_name=GO:0031056	GO:0031056.value > threshold=0.012155923061072826
node_784: feature_name=GO:0050911	GO:0050911.value <= threshold=0.9555114507675171
node_785: feature_name=GO:1902804	GO:1902804.value <= threshold=0.39919959008693695
node_786: feature_name=GO:0090069	GO:0090069.value <= threshold=0.1206773966550827
node_787: feature_name=hsa05222	hsa05222.value > threshold=0.029254859313368797
node_853: feature_name=n110	n110.value <= threshold=0.0028310000197961926
node_854: feature_name=n61	n61.value > threshold=0.010850000195205212
node_876: feature_name=GO:0001658	GO:0001658.value > threshold=0.5237079858779907
node_938: feature_name=n260	n260.value > threshold=0.018484500236809254
node_942: feature_name=GO:0097480	GO:0097480.value <= threshold=0.10728578269481659
node_943: feature_name=hsa05218	hsa05218.value > threshold=0.06275288015604019
Class: COADREAD
Rules_93	passed counts:7
node_0: feature_name=GO:0019002	GO:0019002.value <= threshold=0.44260887801647186
node_1: feature_name=GO:0031052	GO:0031052.value <= threshold=1.5308658480644226
node_2: feature_name=GO:0044029	GO:0044029.value <= threshold=2.612712264060974
node_3: feature_name=GO:0061428	GO:0061428.value <= threshold=1.6541950702667236
node_4: feature_name=GO:0050911	GO:0050911.value > threshold=9.647738242579695e-06
node_442: feature_name=GO:0031056	GO:0031056.value > threshold=0.012155923061072826
node_784: feature_name=GO:0050911	GO:0050911.value <= threshold=0.9555114507675171
node_785: feature_name=GO:1902804	GO:1902804.value <= threshold=0.39919959008693695
node_786: feature_name=GO:0090069	GO:0090069.value <= threshold=0.1206773966550827
node_787: feature_name=hsa05222	hsa05222.value > threshold=0.029254859313368797
node_853: feature_name=n110	n110.value <= threshold=0.0028310000197961926
node_854: feature_name=n61	n61.value > threshold=0.010850000195205212
node_876: feature_name=GO:0001658	GO:0001658.value <= threshold=0.5237079858779907
node_877: feature_name=GO:0019661	GO:0019661.value <= threshold=1.8170058131217957
node_878: feature_name=GO:0043465	GO:0043465.value > threshold=0.938182920217514
node_912: feature_name=GO:0035176	GO:0035176.value <= threshold=0.2707503139972687
node_913: feature_name=GO:0098660	GO:0098660.value <= threshold=0.6433568298816681
node_914: feature_name=n72	n72.value <= threshold=0.024914000183343887
Class: BLCA
Rules_94	passed counts:7
node_0: feature_name=GO:0019002	GO:0019002.value <= threshold=0.44260887801647186
node_1: feature_name=GO:0031052	GO:0031052.value <= threshold=1.5308658480644226
node_2: feature_name=GO:0044029	GO:0044029.value <= threshold=2.612712264060974
node_3: feature_name=GO:0061428	GO:0061428.value <= threshold=1.6541950702667236
node_4: feature_name=GO:0050911	GO:0050911.value > threshold=9.647738242579695e-06
node_442: feature_name=GO:0031056	GO:0031056.value > threshold=0.012155923061072826
node_784: feature_name=GO:0050911	GO:0050911.value <= threshold=0.9555114507675171
node_785: feature_name=GO:1902804	GO:1902804.value <= threshold=0.39919959008693695
node_786: feature_name=GO:0090069	GO:0090069.value <= threshold=0.1206773966550827
node_787: feature_name=hsa05222	hsa05222.value > threshold=0.029254859313368797
node_853: feature_name=n110	n110.value <= threshold=0.0028310000197961926
node_854: feature_name=n61	n61.value > threshold=0.010850000195205212
node_876: feature_name=GO:0001658	GO:0001658.value <= threshold=0.5237079858779907
node_877: feature_name=GO:0019661	GO:0019661.value <= threshold=1.8170058131217957
node_878: feature_name=GO:0043465	GO:0043465.value <= threshold=0.938182920217514
node_879: feature_name=n243	n243.value <= threshold=0.002851500059477985
node_880: feature_name=GO:0046914	GO:0046914.value > threshold=0.7266994714736938
node_898: feature_name=n20	n20.value > threshold=0.010723500046879053
Class: LUSC
Rules_95	passed counts:7
node_0: feature_name=GO:0019002	GO:0019002.value <= threshold=0.44260887801647186
node_1: feature_name=GO:0031052	GO:0031052.value <= threshold=1.5308658480644226
node_2: feature_name=GO:0044029	GO:0044029.value <= threshold=2.612712264060974
node_3: feature_name=GO:0061428	GO:0061428.value <= threshold=1.6541950702667236
node_4: feature_name=GO:0050911	GO:0050911.value > threshold=9.647738242579695e-06
node_442: feature_name=GO:0031056	GO:0031056.value > threshold=0.012155923061072826
node_784: feature_name=GO:0050911	GO:0050911.value <= threshold=0.9555114507675171
node_785: feature_name=GO:1902804	GO:1902804.value <= threshold=0.39919959008693695
node_786: feature_name=GO:0090069	GO:0090069.value <= threshold=0.1206773966550827
node_787: feature_name=hsa05222	hsa05222.value <= threshold=0.029254859313368797
node_788: feature_name=w235	w235.value > threshold=0.07797800004482269
Class: GBM
Rules_96	passed counts:7
node_0: feature_name=GO:0019002	GO:0019002.value <= threshold=0.44260887801647186
node_1: feature_name=GO:0031052	GO:0031052.value <= threshold=1.5308658480644226
node_2: feature_name=GO:0044029	GO:0044029.value <= threshold=2.612712264060974
node_3: feature_name=GO:0061428	GO:0061428.value <= threshold=1.6541950702667236
node_4: feature_name=GO:0050911	GO:0050911.value > threshold=9.647738242579695e-06
node_442: feature_name=GO:0031056	GO:0031056.value > threshold=0.012155923061072826
node_784: feature_name=GO:0050911	GO:0050911.value <= threshold=0.9555114507675171
node_785: feature_name=GO:1902804	GO:1902804.value <= threshold=0.39919959008693695
node_786: feature_name=GO:0090069	GO:0090069.value <= threshold=0.1206773966550827
node_787: feature_name=hsa05222	hsa05222.value <= threshold=0.029254859313368797
node_788: feature_name=w235	w235.value <= threshold=0.07797800004482269
node_789: feature_name=GO:0060788	GO:0060788.value <= threshold=1.3469486832618713
node_790: feature_name=n99	n99.value > threshold=0.029147000052034855
node_802: feature_name=n419	n419.value > threshold=-0.0438499990850687
node_804: feature_name=GO:0001508	GO:0001508.value > threshold=1.1710909008979797
node_848: feature_name=GO:0004984	GO:0004984.value > threshold=0.10697948560118675
Class: COADREAD
Rules_97	passed counts:7
node_0: feature_name=GO:0019002	GO:0019002.value <= threshold=0.44260887801647186
node_1: feature_name=GO:0031052	GO:0031052.value <= threshold=1.5308658480644226
node_2: feature_name=GO:0044029	GO:0044029.value <= threshold=2.612712264060974
node_3: feature_name=GO:0061428	GO:0061428.value <= threshold=1.6541950702667236
node_4: feature_name=GO:0050911	GO:0050911.value > threshold=9.647738242579695e-06
node_442: feature_name=GO:0031056	GO:0031056.value <= threshold=0.012155923061072826
node_443: feature_name=GO:0031657	GO:0031657.value <= threshold=1.5778968930244446
node_444: feature_name=GO:0050804	GO:0050804.value <= threshold=0.01197261456400156
node_445: feature_name=n8	n8.value > threshold=-0.09153800085186958
node_469: feature_name=GO:0098655	GO:0098655.value > threshold=1.5729240775108337
Class: GBM
Rules_98	passed counts:7
node_0: feature_name=GO:0019002	GO:0019002.value <= threshold=0.44260887801647186
node_1: feature_name=GO:0031052	GO:0031052.value <= threshold=1.5308658480644226
node_2: feature_name=GO:0044029	GO:0044029.value <= threshold=2.612712264060974
node_3: feature_name=GO:0061428	GO:0061428.value <= threshold=1.6541950702667236
node_4: feature_name=GO:0050911	GO:0050911.value > threshold=9.647738242579695e-06
node_442: feature_name=GO:0031056	GO:0031056.value <= threshold=0.012155923061072826
node_443: feature_name=GO:0031657	GO:0031657.value <= threshold=1.5778968930244446
node_444: feature_name=GO:0050804	GO:0050804.value <= threshold=0.01197261456400156
node_445: feature_name=n8	n8.value > threshold=-0.09153800085186958
node_469: feature_name=GO:0098655	GO:0098655.value <= threshold=1.5729240775108337
node_470: feature_name=n266	n266.value > threshold=-0.010881000198423862
node_506: feature_name=GO:0015276	GO:0015276.value <= threshold=0.4701277017593384
node_507: feature_name=w89	w89.value > threshold=-0.3049499988555908
node_511: feature_name=GO:0043229	GO:0043229.value > threshold=0.03389906696975231
node_515: feature_name=GO:0007411	GO:0007411.value <= threshold=0.5589516758918762
node_516: feature_name=w6	w6.value <= threshold=-0.03357799910008907
node_517: feature_name=n285	n285.value > threshold=0.07695050165057182
node_525: feature_name=GO:0002768	GO:0002768.value <= threshold=0.366853803396225
Class: KIRC
Rules_99	passed counts:7
node_0: feature_name=GO:0019002	GO:0019002.value <= threshold=0.44260887801647186
node_1: feature_name=GO:0031052	GO:0031052.value <= threshold=1.5308658480644226
node_2: feature_name=GO:0044029	GO:0044029.value <= threshold=2.612712264060974
node_3: feature_name=GO:0061428	GO:0061428.value <= threshold=1.6541950702667236
node_4: feature_name=GO:0050911	GO:0050911.value <= threshold=9.647738242579695e-06
node_5: feature_name=GO:0006461	GO:0006461.value > threshold=0.0025558413472026587
node_93: feature_name=GO:0030277	GO:0030277.value <= threshold=1.1837461590766907
node_94: feature_name=GO:0006346	GO:0006346.value <= threshold=1.8170061111450195
node_95: feature_name=n76	n76.value <= threshold=0.002943999948911369
node_96: feature_name=GO:0016055	GO:0016055.value > threshold=0.03425486758351326
node_156: feature_name=n353	n353.value <= threshold=0.012018000241369009
node_157: feature_name=w192	w192.value > threshold=-0.310294508934021
node_221: feature_name=n257	n257.value > threshold=0.012840999756008387
node_229: feature_name=n241	n241.value > threshold=-0.057298000901937485
node_235: feature_name=GO:0003012	GO:0003012.value <= threshold=1.3560556173324585
node_236: feature_name=GO:0010941	GO:0010941.value > threshold=0.06190578080713749
node_242: feature_name=hsa05166	hsa05166.value <= threshold=0.05409076437354088
node_243: feature_name=n469	n469.value > threshold=-0.019852999597787857
Class: GBM
Rules_100	passed counts:7
node_0: feature_name=GO:0019002	GO:0019002.value <= threshold=0.44260887801647186
node_1: feature_name=GO:0031052	GO:0031052.value <= threshold=1.5308658480644226
node_2: feature_name=GO:0044029	GO:0044029.value <= threshold=2.612712264060974
node_3: feature_name=GO:0061428	GO:0061428.value <= threshold=1.6541950702667236
node_4: feature_name=GO:0050911	GO:0050911.value <= threshold=9.647738242579695e-06
node_5: feature_name=GO:0006461	GO:0006461.value > threshold=0.0025558413472026587
node_93: feature_name=GO:0030277	GO:0030277.value <= threshold=1.1837461590766907
node_94: feature_name=GO:0006346	GO:0006346.value <= threshold=1.8170061111450195
node_95: feature_name=n76	n76.value <= threshold=0.002943999948911369
node_96: feature_name=GO:0016055	GO:0016055.value > threshold=0.03425486758351326
node_156: feature_name=n353	n353.value <= threshold=0.012018000241369009
node_157: feature_name=w192	w192.value <= threshold=-0.310294508934021
node_158: feature_name=GO:0006915	GO:0006915.value > threshold=0.20105624943971634
node_182: feature_name=GO:0007617	GO:0007617.value > threshold=0.3775535225868225
node_218: feature_name=GO:0003264	GO:0003264.value <= threshold=1.7894567251205444
Class: UCEC
Rules_101	passed counts:7
node_0: feature_name=GO:0019002	GO:0019002.value <= threshold=0.44260887801647186
node_1: feature_name=GO:0031052	GO:0031052.value <= threshold=1.5308658480644226
node_2: feature_name=GO:0044029	GO:0044029.value <= threshold=2.612712264060974
node_3: feature_name=GO:0061428	GO:0061428.value <= threshold=1.6541950702667236
node_4: feature_name=GO:0050911	GO:0050911.value <= threshold=9.647738242579695e-06
node_5: feature_name=GO:0006461	GO:0006461.value > threshold=0.0025558413472026587
node_93: feature_name=GO:0030277	GO:0030277.value <= threshold=1.1837461590766907
node_94: feature_name=GO:0006346	GO:0006346.value <= threshold=1.8170061111450195
node_95: feature_name=n76	n76.value <= threshold=0.002943999948911369
node_96: feature_name=GO:0016055	GO:0016055.value > threshold=0.03425486758351326
node_156: feature_name=n353	n353.value <= threshold=0.012018000241369009
node_157: feature_name=w192	w192.value <= threshold=-0.310294508934021
node_158: feature_name=GO:0006915	GO:0006915.value > threshold=0.20105624943971634
node_182: feature_name=GO:0007617	GO:0007617.value <= threshold=0.3775535225868225
node_183: feature_name=w242	w242.value <= threshold=-0.16900649666786194
node_184: feature_name=n166	n166.value <= threshold=0.1409519985318184
Class: COADREAD
Rules_102	passed counts:7
node_0: feature_name=GO:0019002	GO:0019002.value <= threshold=0.44260887801647186
node_1: feature_name=GO:0031052	GO:0031052.value <= threshold=1.5308658480644226
node_2: feature_name=GO:0044029	GO:0044029.value <= threshold=2.612712264060974
node_3: feature_name=GO:0061428	GO:0061428.value <= threshold=1.6541950702667236
node_4: feature_name=GO:0050911	GO:0050911.value <= threshold=9.647738242579695e-06
node_5: feature_name=GO:0006461	GO:0006461.value > threshold=0.0025558413472026587
node_93: feature_name=GO:0030277	GO:0030277.value <= threshold=1.1837461590766907
node_94: feature_name=GO:0006346	GO:0006346.value <= threshold=1.8170061111450195
node_95: feature_name=n76	n76.value <= threshold=0.002943999948911369
node_96: feature_name=GO:0016055	GO:0016055.value > threshold=0.03425486758351326
node_156: feature_name=n353	n353.value <= threshold=0.012018000241369009
node_157: feature_name=w192	w192.value <= threshold=-0.310294508934021
node_158: feature_name=GO:0006915	GO:0006915.value <= threshold=0.20105624943971634
node_159: feature_name=n158	n158.value <= threshold=-0.015678999945521355
node_160: feature_name=n60	n60.value > threshold=0.15158149600028992
node_172: feature_name=n49	n49.value > threshold=-0.020546499639749527
Class: KIRC
Rules_103	passed counts:7
node_0: feature_name=GO:0019002	GO:0019002.value <= threshold=0.44260887801647186
node_1: feature_name=GO:0031052	GO:0031052.value <= threshold=1.5308658480644226
node_2: feature_name=GO:0044029	GO:0044029.value <= threshold=2.612712264060974
node_3: feature_name=GO:0061428	GO:0061428.value <= threshold=1.6541950702667236
node_4: feature_name=GO:0050911	GO:0050911.value <= threshold=9.647738242579695e-06
node_5: feature_name=GO:0006461	GO:0006461.value > threshold=0.0025558413472026587
node_93: feature_name=GO:0030277	GO:0030277.value <= threshold=1.1837461590766907
node_94: feature_name=GO:0006346	GO:0006346.value <= threshold=1.8170061111450195
node_95: feature_name=n76	n76.value <= threshold=0.002943999948911369
node_96: feature_name=GO:0016055	GO:0016055.value <= threshold=0.03425486758351326
node_97: feature_name=n308	n308.value <= threshold=0.05376549996435642
node_98: feature_name=n500	n500.value > threshold=0.07162800058722496
node_116: feature_name=w250	w250.value > threshold=-0.26135149598121643
node_126: feature_name=GO:0031410	GO:0031410.value <= threshold=0.21292828023433685
node_127: feature_name=n136	n136.value > threshold=-0.06145699881017208
node_137: feature_name=GO:0006323	GO:0006323.value <= threshold=0.9592724144458771
Class: OV
Rules_104	passed counts:7
node_0: feature_name=GO:0019002	GO:0019002.value <= threshold=0.44260887801647186
node_1: feature_name=GO:0031052	GO:0031052.value <= threshold=1.5308658480644226
node_2: feature_name=GO:0044029	GO:0044029.value <= threshold=2.612712264060974
node_3: feature_name=GO:0061428	GO:0061428.value <= threshold=1.6541950702667236
node_4: feature_name=GO:0050911	GO:0050911.value <= threshold=9.647738242579695e-06
node_5: feature_name=GO:0006461	GO:0006461.value <= threshold=0.0025558413472026587
node_6: feature_name=GO:0044092	GO:0044092.value > threshold=0.04476059600710869
node_50: feature_name=n493	n493.value > threshold=0.026771499775350094
node_58: feature_name=n384	n384.value > threshold=-0.03503799997270107
node_82: feature_name=GO:0043229	GO:0043229.value > threshold=0.21182634681463242
node_90: feature_name=GO:0036477	GO:0036477.value <= threshold=1.139089822769165
Class: LAML
Rules_105	passed counts:6
node_0: feature_name=GO:0019002	GO:0019002.value > threshold=0.44260887801647186
node_1592: feature_name=GO:0019002	GO:0019002.value > threshold=1.837906301021576
node_1624: feature_name=GO:0044028	GO:0044028.value <= threshold=2.6347100734710693
node_1625: feature_name=GO:0019002	GO:0019002.value <= threshold=2.587051510810852
node_1626: feature_name=hsa05215	hsa05215.value <= threshold=0.49044638872146606
node_1627: feature_name=n76	n76.value > threshold=0.003011499997228384
node_1631: feature_name=GO:0036092	GO:0036092.value <= threshold=1.1274972558021545
Class: COADREAD
Rules_106	passed counts:6
node_0: feature_name=GO:0019002	GO:0019002.value <= threshold=0.44260887801647186
node_1: feature_name=GO:0031052	GO:0031052.value > threshold=1.5308658480644226
node_1165: feature_name=hsa05214	hsa05214.value > threshold=1.511171042919159
node_1493: feature_name=GO:0043560	GO:0043560.value <= threshold=1.633065402507782
node_1494: feature_name=GO:0031657	GO:0031657.value <= threshold=1.520110011100769
node_1495: feature_name=GO:0051310	GO:0051310.value <= threshold=0.865888774394989
node_1496: feature_name=w190	w190.value > threshold=0.35905349254608154
node_1510: feature_name=n387	n387.value > threshold=-0.013395499903708696
node_1548: feature_name=GO:0038095	GO:0038095.value > threshold=0.1560928225517273
Class: BRCA
Rules_107	passed counts:6
node_0: feature_name=GO:0019002	GO:0019002.value <= threshold=0.44260887801647186
node_1: feature_name=GO:0031052	GO:0031052.value > threshold=1.5308658480644226
node_1165: feature_name=hsa05214	hsa05214.value <= threshold=1.511171042919159
node_1166: feature_name=GO:0042772	GO:0042772.value > threshold=1.405928909778595
node_1312: feature_name=GO:0007141	GO:0007141.value <= threshold=1.2595189213752747
node_1313: feature_name=GO:0031056	GO:0031056.value > threshold=0.5744103491306305
node_1323: feature_name=GO:0032101	GO:0032101.value <= threshold=1.6673882603645325
node_1324: feature_name=GO:0001508	GO:0001508.value > threshold=1.8742843270301819
node_1460: feature_name=GO:0048729	GO:0048729.value <= threshold=0.5308722704648972
Class: BRCA
Rules_108	passed counts:6
node_0: feature_name=GO:0019002	GO:0019002.value <= threshold=0.44260887801647186
node_1: feature_name=GO:0031052	GO:0031052.value > threshold=1.5308658480644226
node_1165: feature_name=hsa05214	hsa05214.value <= threshold=1.511171042919159
node_1166: feature_name=GO:0042772	GO:0042772.value <= threshold=1.405928909778595
node_1167: feature_name=GO:0005507	GO:0005507.value > threshold=0.08644267916679382
node_1187: feature_name=n445	n445.value > threshold=0.03499799966812134
node_1293: feature_name=n206	n206.value <= threshold=-0.00248149991966784
node_1294: feature_name=hsa04810	hsa04810.value > threshold=0.11829569190740585
node_1306: feature_name=n267	n267.value <= threshold=0.0812550000846386
Class: OV
Rules_109	passed counts:6
node_0: feature_name=GO:0019002	GO:0019002.value <= threshold=0.44260887801647186
node_1: feature_name=GO:0031052	GO:0031052.value > threshold=1.5308658480644226
node_1165: feature_name=hsa05214	hsa05214.value <= threshold=1.511171042919159
node_1166: feature_name=GO:0042772	GO:0042772.value <= threshold=1.405928909778595
node_1167: feature_name=GO:0005507	GO:0005507.value > threshold=0.08644267916679382
node_1187: feature_name=n445	n445.value <= threshold=0.03499799966812134
node_1188: feature_name=GO:0044428	GO:0044428.value > threshold=0.15810610353946686
node_1216: feature_name=GO:0090199	GO:0090199.value <= threshold=0.8135712444782257
node_1217: feature_name=GO:0072358	GO:0072358.value <= threshold=0.4771808534860611
node_1218: feature_name=GO:0044712	GO:0044712.value <= threshold=0.2509765625
Class: BLCA
Rules_110	passed counts:6
node_0: feature_name=GO:0019002	GO:0019002.value <= threshold=0.44260887801647186
node_1: feature_name=GO:0031052	GO:0031052.value <= threshold=1.5308658480644226
node_2: feature_name=GO:0044029	GO:0044029.value <= threshold=2.612712264060974
node_3: feature_name=GO:0061428	GO:0061428.value <= threshold=1.6541950702667236
node_4: feature_name=GO:0050911	GO:0050911.value > threshold=9.647738242579695e-06
node_442: feature_name=GO:0031056	GO:0031056.value > threshold=0.012155923061072826
node_784: feature_name=GO:0050911	GO:0050911.value > threshold=0.9555114507675171
node_1060: feature_name=n413	n413.value <= threshold=-0.051284000277519226
node_1061: feature_name=GO:2001141	GO:2001141.value > threshold=0.9192121624946594
node_1095: feature_name=w135	w135.value <= threshold=-0.05625000037252903
Class: UCEC
Rules_111	passed counts:6
node_0: feature_name=GO:0019002	GO:0019002.value <= threshold=0.44260887801647186
node_1: feature_name=GO:0031052	GO:0031052.value <= threshold=1.5308658480644226
node_2: feature_name=GO:0044029	GO:0044029.value <= threshold=2.612712264060974
node_3: feature_name=GO:0061428	GO:0061428.value <= threshold=1.6541950702667236
node_4: feature_name=GO:0050911	GO:0050911.value > threshold=9.647738242579695e-06
node_442: feature_name=GO:0031056	GO:0031056.value > threshold=0.012155923061072826
node_784: feature_name=GO:0050911	GO:0050911.value > threshold=0.9555114507675171
node_1060: feature_name=n413	n413.value <= threshold=-0.051284000277519226
node_1061: feature_name=GO:2001141	GO:2001141.value <= threshold=0.9192121624946594
node_1062: feature_name=GO:0071230	GO:0071230.value <= threshold=0.835265189409256
node_1063: feature_name=GO:0051488	GO:0051488.value > threshold=0.5319586247205734
node_1083: feature_name=hsa05214	hsa05214.value <= threshold=1.7544268369674683
Class: LUAD
Rules_112	passed counts:6
node_0: feature_name=GO:0019002	GO:0019002.value <= threshold=0.44260887801647186
node_1: feature_name=GO:0031052	GO:0031052.value <= threshold=1.5308658480644226
node_2: feature_name=GO:0044029	GO:0044029.value <= threshold=2.612712264060974
node_3: feature_name=GO:0061428	GO:0061428.value <= threshold=1.6541950702667236
node_4: feature_name=GO:0050911	GO:0050911.value > threshold=9.647738242579695e-06
node_442: feature_name=GO:0031056	GO:0031056.value > threshold=0.012155923061072826
node_784: feature_name=GO:0050911	GO:0050911.value <= threshold=0.9555114507675171
node_785: feature_name=GO:1902804	GO:1902804.value <= threshold=0.39919959008693695
node_786: feature_name=GO:0090069	GO:0090069.value <= threshold=0.1206773966550827
node_787: feature_name=hsa05222	hsa05222.value > threshold=0.029254859313368797
node_853: feature_name=n110	n110.value <= threshold=0.0028310000197961926
node_854: feature_name=n61	n61.value > threshold=0.010850000195205212
node_876: feature_name=GO:0001658	GO:0001658.value > threshold=0.5237079858779907
node_938: feature_name=n260	n260.value > threshold=0.018484500236809254
node_942: feature_name=GO:0097480	GO:0097480.value > threshold=0.10728578269481659
node_946: feature_name=GO:1901800	GO:1901800.value > threshold=0.18478315323591232
node_956: feature_name=GO:0008076	GO:0008076.value <= threshold=0.5837579965591431
Class: LUSC
Rules_113	passed counts:6
node_0: feature_name=GO:0019002	GO:0019002.value <= threshold=0.44260887801647186
node_1: feature_name=GO:0031052	GO:0031052.value <= threshold=1.5308658480644226
node_2: feature_name=GO:0044029	GO:0044029.value <= threshold=2.612712264060974
node_3: feature_name=GO:0061428	GO:0061428.value <= threshold=1.6541950702667236
node_4: feature_name=GO:0050911	GO:0050911.value > threshold=9.647738242579695e-06
node_442: feature_name=GO:0031056	GO:0031056.value > threshold=0.012155923061072826
node_784: feature_name=GO:0050911	GO:0050911.value <= threshold=0.9555114507675171
node_785: feature_name=GO:1902804	GO:1902804.value <= threshold=0.39919959008693695
node_786: feature_name=GO:0090069	GO:0090069.value <= threshold=0.1206773966550827
node_787: feature_name=hsa05222	hsa05222.value > threshold=0.029254859313368797
node_853: feature_name=n110	n110.value <= threshold=0.0028310000197961926
node_854: feature_name=n61	n61.value > threshold=0.010850000195205212
node_876: feature_name=GO:0001658	GO:0001658.value <= threshold=0.5237079858779907
node_877: feature_name=GO:0019661	GO:0019661.value <= threshold=1.8170058131217957
node_878: feature_name=GO:0043465	GO:0043465.value <= threshold=0.938182920217514
node_879: feature_name=n243	n243.value > threshold=0.002851500059477985
node_901: feature_name=GO:0098742	GO:0098742.value <= threshold=0.9895021021366119
node_902: feature_name=w5	w5.value <= threshold=0.103217002004385
node_903: feature_name=n448	n448.value > threshold=0.011669999919831753
Class: BRCA
Rules_114	passed counts:6
node_0: feature_name=GO:0019002	GO:0019002.value <= threshold=0.44260887801647186
node_1: feature_name=GO:0031052	GO:0031052.value <= threshold=1.5308658480644226
node_2: feature_name=GO:0044029	GO:0044029.value <= threshold=2.612712264060974
node_3: feature_name=GO:0061428	GO:0061428.value <= threshold=1.6541950702667236
node_4: feature_name=GO:0050911	GO:0050911.value > threshold=9.647738242579695e-06
node_442: feature_name=GO:0031056	GO:0031056.value > threshold=0.012155923061072826
node_784: feature_name=GO:0050911	GO:0050911.value <= threshold=0.9555114507675171
node_785: feature_name=GO:1902804	GO:1902804.value <= threshold=0.39919959008693695
node_786: feature_name=GO:0090069	GO:0090069.value <= threshold=0.1206773966550827
node_787: feature_name=hsa05222	hsa05222.value > threshold=0.029254859313368797
node_853: feature_name=n110	n110.value <= threshold=0.0028310000197961926
node_854: feature_name=n61	n61.value > threshold=0.010850000195205212
node_876: feature_name=GO:0001658	GO:0001658.value <= threshold=0.5237079858779907
node_877: feature_name=GO:0019661	GO:0019661.value <= threshold=1.8170058131217957
node_878: feature_name=GO:0043465	GO:0043465.value <= threshold=0.938182920217514
node_879: feature_name=n243	n243.value <= threshold=0.002851500059477985
node_880: feature_name=GO:0046914	GO:0046914.value <= threshold=0.7266994714736938
node_881: feature_name=GO:0048667	GO:0048667.value > threshold=1.6709909439086914
Class: HNSC
Rules_115	passed counts:6
node_0: feature_name=GO:0019002	GO:0019002.value <= threshold=0.44260887801647186
node_1: feature_name=GO:0031052	GO:0031052.value <= threshold=1.5308658480644226
node_2: feature_name=GO:0044029	GO:0044029.value <= threshold=2.612712264060974
node_3: feature_name=GO:0061428	GO:0061428.value <= threshold=1.6541950702667236
node_4: feature_name=GO:0050911	GO:0050911.value > threshold=9.647738242579695e-06
node_442: feature_name=GO:0031056	GO:0031056.value <= threshold=0.012155923061072826
node_443: feature_name=GO:0031657	GO:0031657.value <= threshold=1.5778968930244446
node_444: feature_name=GO:0050804	GO:0050804.value > threshold=0.01197261456400156
node_562: feature_name=n479	n479.value <= threshold=0.10103050246834755
node_563: feature_name=GO:0004930	GO:0004930.value > threshold=1.3939525485038757
node_725: feature_name=GO:1901215	GO:1901215.value <= threshold=0.18657370656728745
Class: LUAD
Rules_116	passed counts:6
node_0: feature_name=GO:0019002	GO:0019002.value <= threshold=0.44260887801647186
node_1: feature_name=GO:0031052	GO:0031052.value <= threshold=1.5308658480644226
node_2: feature_name=GO:0044029	GO:0044029.value <= threshold=2.612712264060974
node_3: feature_name=GO:0061428	GO:0061428.value <= threshold=1.6541950702667236
node_4: feature_name=GO:0050911	GO:0050911.value > threshold=9.647738242579695e-06
node_442: feature_name=GO:0031056	GO:0031056.value <= threshold=0.012155923061072826
node_443: feature_name=GO:0031657	GO:0031657.value <= threshold=1.5778968930244446
node_444: feature_name=GO:0050804	GO:0050804.value > threshold=0.01197261456400156
node_562: feature_name=n479	n479.value <= threshold=0.10103050246834755
node_563: feature_name=GO:0004930	GO:0004930.value <= threshold=1.3939525485038757
node_564: feature_name=GO:0044767	GO:0044767.value > threshold=0.2603907734155655
node_598: feature_name=GO:0032776	GO:0032776.value <= threshold=0.5589029490947723
node_599: feature_name=GO:0021801	GO:0021801.value <= threshold=1.1827324032783508
node_600: feature_name=n378	n378.value > threshold=-0.05305299907922745
node_610: feature_name=n444	n444.value > threshold=-0.06549949944019318
node_636: feature_name=n325	n325.value > threshold=0.020932000130414963
node_646: feature_name=GO:0055123	GO:0055123.value > threshold=0.3335540145635605
node_682: feature_name=GO:0043279	GO:0043279.value > threshold=0.5873889625072479
node_708: feature_name=GO:0006351	GO:0006351.value > threshold=0.28894735872745514
Class: GBM
Rules_117	passed counts:6
node_0: feature_name=GO:0019002	GO:0019002.value <= threshold=0.44260887801647186
node_1: feature_name=GO:0031052	GO:0031052.value <= threshold=1.5308658480644226
node_2: feature_name=GO:0044029	GO:0044029.value <= threshold=2.612712264060974
node_3: feature_name=GO:0061428	GO:0061428.value <= threshold=1.6541950702667236
node_4: feature_name=GO:0050911	GO:0050911.value > threshold=9.647738242579695e-06
node_442: feature_name=GO:0031056	GO:0031056.value <= threshold=0.012155923061072826
node_443: feature_name=GO:0031657	GO:0031657.value <= threshold=1.5778968930244446
node_444: feature_name=GO:0050804	GO:0050804.value > threshold=0.01197261456400156
node_562: feature_name=n479	n479.value <= threshold=0.10103050246834755
node_563: feature_name=GO:0004930	GO:0004930.value <= threshold=1.3939525485038757
node_564: feature_name=GO:0044767	GO:0044767.value > threshold=0.2603907734155655
node_598: feature_name=GO:0032776	GO:0032776.value <= threshold=0.5589029490947723
node_599: feature_name=GO:0021801	GO:0021801.value <= threshold=1.1827324032783508
node_600: feature_name=n378	n378.value > threshold=-0.05305299907922745
node_610: feature_name=n444	n444.value > threshold=-0.06549949944019318
node_636: feature_name=n325	n325.value > threshold=0.020932000130414963
node_646: feature_name=GO:0055123	GO:0055123.value > threshold=0.3335540145635605
node_682: feature_name=GO:0043279	GO:0043279.value <= threshold=0.5873889625072479
node_683: feature_name=GO:0010959	GO:0010959.value > threshold=0.696491539478302
node_703: feature_name=GO:0032501	GO:0032501.value <= threshold=1.2384960055351257
Class: LUSC
Rules_118	passed counts:6
node_0: feature_name=GO:0019002	GO:0019002.value <= threshold=0.44260887801647186
node_1: feature_name=GO:0031052	GO:0031052.value <= threshold=1.5308658480644226
node_2: feature_name=GO:0044029	GO:0044029.value <= threshold=2.612712264060974
node_3: feature_name=GO:0061428	GO:0061428.value <= threshold=1.6541950702667236
node_4: feature_name=GO:0050911	GO:0050911.value > threshold=9.647738242579695e-06
node_442: feature_name=GO:0031056	GO:0031056.value <= threshold=0.012155923061072826
node_443: feature_name=GO:0031657	GO:0031657.value <= threshold=1.5778968930244446
node_444: feature_name=GO:0050804	GO:0050804.value > threshold=0.01197261456400156
node_562: feature_name=n479	n479.value <= threshold=0.10103050246834755
node_563: feature_name=GO:0004930	GO:0004930.value <= threshold=1.3939525485038757
node_564: feature_name=GO:0044767	GO:0044767.value > threshold=0.2603907734155655
node_598: feature_name=GO:0032776	GO:0032776.value <= threshold=0.5589029490947723
node_599: feature_name=GO:0021801	GO:0021801.value <= threshold=1.1827324032783508
node_600: feature_name=n378	n378.value > threshold=-0.05305299907922745
node_610: feature_name=n444	n444.value > threshold=-0.06549949944019318
node_636: feature_name=n325	n325.value > threshold=0.020932000130414963
node_646: feature_name=GO:0055123	GO:0055123.value <= threshold=0.3335540145635605
node_647: feature_name=n35	n35.value > threshold=0.0632684975862503
Class: BRCA
Rules_119	passed counts:6
node_0: feature_name=GO:0019002	GO:0019002.value <= threshold=0.44260887801647186
node_1: feature_name=GO:0031052	GO:0031052.value <= threshold=1.5308658480644226
node_2: feature_name=GO:0044029	GO:0044029.value <= threshold=2.612712264060974
node_3: feature_name=GO:0061428	GO:0061428.value <= threshold=1.6541950702667236
node_4: feature_name=GO:0050911	GO:0050911.value > threshold=9.647738242579695e-06
node_442: feature_name=GO:0031056	GO:0031056.value <= threshold=0.012155923061072826
node_443: feature_name=GO:0031657	GO:0031657.value <= threshold=1.5778968930244446
node_444: feature_name=GO:0050804	GO:0050804.value > threshold=0.01197261456400156
node_562: feature_name=n479	n479.value <= threshold=0.10103050246834755
node_563: feature_name=GO:0004930	GO:0004930.value <= threshold=1.3939525485038757
node_564: feature_name=GO:0044767	GO:0044767.value > threshold=0.2603907734155655
node_598: feature_name=GO:0032776	GO:0032776.value <= threshold=0.5589029490947723
node_599: feature_name=GO:0021801	GO:0021801.value <= threshold=1.1827324032783508
node_600: feature_name=n378	n378.value > threshold=-0.05305299907922745
node_610: feature_name=n444	n444.value > threshold=-0.06549949944019318
node_636: feature_name=n325	n325.value <= threshold=0.020932000130414963
node_637: feature_name=GO:0050900	GO:0050900.value > threshold=0.06751478463411331
node_641: feature_name=GO:0051252	GO:0051252.value > threshold=0.05744622088968754
Class: COADREAD
Rules_120	passed counts:6
node_0: feature_name=GO:0019002	GO:0019002.value <= threshold=0.44260887801647186
node_1: feature_name=GO:0031052	GO:0031052.value <= threshold=1.5308658480644226
node_2: feature_name=GO:0044029	GO:0044029.value <= threshold=2.612712264060974
node_3: feature_name=GO:0061428	GO:0061428.value <= threshold=1.6541950702667236
node_4: feature_name=GO:0050911	GO:0050911.value > threshold=9.647738242579695e-06
node_442: feature_name=GO:0031056	GO:0031056.value <= threshold=0.012155923061072826
node_443: feature_name=GO:0031657	GO:0031657.value <= threshold=1.5778968930244446
node_444: feature_name=GO:0050804	GO:0050804.value > threshold=0.01197261456400156
node_562: feature_name=n479	n479.value <= threshold=0.10103050246834755
node_563: feature_name=GO:0004930	GO:0004930.value <= threshold=1.3939525485038757
node_564: feature_name=GO:0044767	GO:0044767.value > threshold=0.2603907734155655
node_598: feature_name=GO:0032776	GO:0032776.value <= threshold=0.5589029490947723
node_599: feature_name=GO:0021801	GO:0021801.value <= threshold=1.1827324032783508
node_600: feature_name=n378	n378.value > threshold=-0.05305299907922745
node_610: feature_name=n444	n444.value <= threshold=-0.06549949944019318
node_611: feature_name=GO:0034333	GO:0034333.value <= threshold=0.2102973461151123
node_612: feature_name=n404	n404.value > threshold=0.06177050061523914
node_614: feature_name=GO:0034399	GO:0034399.value > threshold=0.23771530389785767
Class: GBM
Rules_121	passed counts:6
node_0: feature_name=GO:0019002	GO:0019002.value <= threshold=0.44260887801647186
node_1: feature_name=GO:0031052	GO:0031052.value <= threshold=1.5308658480644226
node_2: feature_name=GO:0044029	GO:0044029.value <= threshold=2.612712264060974
node_3: feature_name=GO:0061428	GO:0061428.value <= threshold=1.6541950702667236
node_4: feature_name=GO:0050911	GO:0050911.value > threshold=9.647738242579695e-06
node_442: feature_name=GO:0031056	GO:0031056.value <= threshold=0.012155923061072826
node_443: feature_name=GO:0031657	GO:0031657.value <= threshold=1.5778968930244446
node_444: feature_name=GO:0050804	GO:0050804.value <= threshold=0.01197261456400156
node_445: feature_name=n8	n8.value > threshold=-0.09153800085186958
node_469: feature_name=GO:0098655	GO:0098655.value <= threshold=1.5729240775108337
node_470: feature_name=n266	n266.value <= threshold=-0.010881000198423862
node_471: feature_name=w156	w156.value <= threshold=-0.18547500669956207
node_472: feature_name=GO:0045595	GO:0045595.value > threshold=0.7647599577903748
Class: COADREAD
Rules_122	passed counts:6
node_0: feature_name=GO:0019002	GO:0019002.value <= threshold=0.44260887801647186
node_1: feature_name=GO:0031052	GO:0031052.value <= threshold=1.5308658480644226
node_2: feature_name=GO:0044029	GO:0044029.value <= threshold=2.612712264060974
node_3: feature_name=GO:0061428	GO:0061428.value <= threshold=1.6541950702667236
node_4: feature_name=GO:0050911	GO:0050911.value > threshold=9.647738242579695e-06
node_442: feature_name=GO:0031056	GO:0031056.value <= threshold=0.012155923061072826
node_443: feature_name=GO:0031657	GO:0031657.value <= threshold=1.5778968930244446
node_444: feature_name=GO:0050804	GO:0050804.value <= threshold=0.01197261456400156
node_445: feature_name=n8	n8.value > threshold=-0.09153800085186958
node_469: feature_name=GO:0098655	GO:0098655.value <= threshold=1.5729240775108337
node_470: feature_name=n266	n266.value <= threshold=-0.010881000198423862
node_471: feature_name=w156	w156.value <= threshold=-0.18547500669956207
node_472: feature_name=GO:0045595	GO:0045595.value <= threshold=0.7647599577903748
node_473: feature_name=w256	w256.value > threshold=0.340334489941597
node_479: feature_name=GO:0032501	GO:0032501.value > threshold=0.29614773392677307
node_481: feature_name=GO:0032869	GO:0032869.value > threshold=0.07980893366038799
node_485: feature_name=GO:0006281	GO:0006281.value > threshold=0.20631234347820282
Class: KIRC
Rules_123	passed counts:6
node_0: feature_name=GO:0019002	GO:0019002.value <= threshold=0.44260887801647186
node_1: feature_name=GO:0031052	GO:0031052.value <= threshold=1.5308658480644226
node_2: feature_name=GO:0044029	GO:0044029.value <= threshold=2.612712264060974
node_3: feature_name=GO:0061428	GO:0061428.value <= threshold=1.6541950702667236
node_4: feature_name=GO:0050911	GO:0050911.value > threshold=9.647738242579695e-06
node_442: feature_name=GO:0031056	GO:0031056.value <= threshold=0.012155923061072826
node_443: feature_name=GO:0031657	GO:0031657.value <= threshold=1.5778968930244446
node_444: feature_name=GO:0050804	GO:0050804.value <= threshold=0.01197261456400156
node_445: feature_name=n8	n8.value > threshold=-0.09153800085186958
node_469: feature_name=GO:0098655	GO:0098655.value <= threshold=1.5729240775108337
node_470: feature_name=n266	n266.value <= threshold=-0.010881000198423862
node_471: feature_name=w156	w156.value <= threshold=-0.18547500669956207
node_472: feature_name=GO:0045595	GO:0045595.value <= threshold=0.7647599577903748
node_473: feature_name=w256	w256.value <= threshold=0.340334489941597
node_474: feature_name=GO:1902494	GO:1902494.value <= threshold=0.44762858748435974
Class: OV
Rules_124	passed counts:6
node_0: feature_name=GO:0019002	GO:0019002.value <= threshold=0.44260887801647186
node_1: feature_name=GO:0031052	GO:0031052.value <= threshold=1.5308658480644226
node_2: feature_name=GO:0044029	GO:0044029.value <= threshold=2.612712264060974
node_3: feature_name=GO:0061428	GO:0061428.value <= threshold=1.6541950702667236
node_4: feature_name=GO:0050911	GO:0050911.value <= threshold=9.647738242579695e-06
node_5: feature_name=GO:0006461	GO:0006461.value > threshold=0.0025558413472026587
node_93: feature_name=GO:0030277	GO:0030277.value <= threshold=1.1837461590766907
node_94: feature_name=GO:0006346	GO:0006346.value <= threshold=1.8170061111450195
node_95: feature_name=n76	n76.value > threshold=0.002943999948911369
node_275: feature_name=GO:0070601	GO:0070601.value <= threshold=0.5473223328590393
node_276: feature_name=n238	n238.value > threshold=0.0742735005915165
node_326: feature_name=n90	n90.value > threshold=-0.01138749998062849
node_340: feature_name=GO:0006928	GO:0006928.value > threshold=0.14370637387037277
node_350: feature_name=GO:0016567	GO:0016567.value > threshold=0.21442794799804688
node_378: feature_name=n371	n371.value <= threshold=0.0010474999726284295
node_379: feature_name=n326	n326.value > threshold=0.04705650173127651
Class: OV
Rules_125	passed counts:6
node_0: feature_name=GO:0019002	GO:0019002.value <= threshold=0.44260887801647186
node_1: feature_name=GO:0031052	GO:0031052.value <= threshold=1.5308658480644226
node_2: feature_name=GO:0044029	GO:0044029.value <= threshold=2.612712264060974
node_3: feature_name=GO:0061428	GO:0061428.value <= threshold=1.6541950702667236
node_4: feature_name=GO:0050911	GO:0050911.value <= threshold=9.647738242579695e-06
node_5: feature_name=GO:0006461	GO:0006461.value > threshold=0.0025558413472026587
node_93: feature_name=GO:0030277	GO:0030277.value <= threshold=1.1837461590766907
node_94: feature_name=GO:0006346	GO:0006346.value <= threshold=1.8170061111450195
node_95: feature_name=n76	n76.value > threshold=0.002943999948911369
node_275: feature_name=GO:0070601	GO:0070601.value <= threshold=0.5473223328590393
node_276: feature_name=n238	n238.value <= threshold=0.0742735005915165
node_277: feature_name=n225	n225.value > threshold=0.05840349942445755
node_321: feature_name=w73	w73.value <= threshold=-0.0322714988142252
Class: LAML
Rules_126	passed counts:6
node_0: feature_name=GO:0019002	GO:0019002.value <= threshold=0.44260887801647186
node_1: feature_name=GO:0031052	GO:0031052.value <= threshold=1.5308658480644226
node_2: feature_name=GO:0044029	GO:0044029.value <= threshold=2.612712264060974
node_3: feature_name=GO:0061428	GO:0061428.value <= threshold=1.6541950702667236
node_4: feature_name=GO:0050911	GO:0050911.value <= threshold=9.647738242579695e-06
node_5: feature_name=GO:0006461	GO:0006461.value > threshold=0.0025558413472026587
node_93: feature_name=GO:0030277	GO:0030277.value <= threshold=1.1837461590766907
node_94: feature_name=GO:0006346	GO:0006346.value <= threshold=1.8170061111450195
node_95: feature_name=n76	n76.value <= threshold=0.002943999948911369
node_96: feature_name=GO:0016055	GO:0016055.value > threshold=0.03425486758351326
node_156: feature_name=n353	n353.value <= threshold=0.012018000241369009
node_157: feature_name=w192	w192.value > threshold=-0.310294508934021
node_221: feature_name=n257	n257.value > threshold=0.012840999756008387
node_229: feature_name=n241	n241.value > threshold=-0.057298000901937485
node_235: feature_name=GO:0003012	GO:0003012.value <= threshold=1.3560556173324585
node_236: feature_name=GO:0010941	GO:0010941.value > threshold=0.06190578080713749
node_242: feature_name=hsa05166	hsa05166.value > threshold=0.05409076437354088
node_248: feature_name=hsa04360	hsa04360.value <= threshold=0.08983337134122849
node_249: feature_name=GO:0015980	GO:0015980.value <= threshold=1.0191655904054642
Class: KIRC
Rules_127	passed counts:6
node_0: feature_name=GO:0019002	GO:0019002.value <= threshold=0.44260887801647186
node_1: feature_name=GO:0031052	GO:0031052.value <= threshold=1.5308658480644226
node_2: feature_name=GO:0044029	GO:0044029.value <= threshold=2.612712264060974
node_3: feature_name=GO:0061428	GO:0061428.value <= threshold=1.6541950702667236
node_4: feature_name=GO:0050911	GO:0050911.value <= threshold=9.647738242579695e-06
node_5: feature_name=GO:0006461	GO:0006461.value > threshold=0.0025558413472026587
node_93: feature_name=GO:0030277	GO:0030277.value <= threshold=1.1837461590766907
node_94: feature_name=GO:0006346	GO:0006346.value <= threshold=1.8170061111450195
node_95: feature_name=n76	n76.value <= threshold=0.002943999948911369
node_96: feature_name=GO:0016055	GO:0016055.value > threshold=0.03425486758351326
node_156: feature_name=n353	n353.value <= threshold=0.012018000241369009
node_157: feature_name=w192	w192.value > threshold=-0.310294508934021
node_221: feature_name=n257	n257.value > threshold=0.012840999756008387
node_229: feature_name=n241	n241.value > threshold=-0.057298000901937485
node_235: feature_name=GO:0003012	GO:0003012.value <= threshold=1.3560556173324585
node_236: feature_name=GO:0010941	GO:0010941.value <= threshold=0.06190578080713749
node_237: feature_name=n193	n193.value > threshold=0.0369889996945858
Class: COADREAD
Rules_128	passed counts:6
node_0: feature_name=GO:0019002	GO:0019002.value <= threshold=0.44260887801647186
node_1: feature_name=GO:0031052	GO:0031052.value <= threshold=1.5308658480644226
node_2: feature_name=GO:0044029	GO:0044029.value <= threshold=2.612712264060974
node_3: feature_name=GO:0061428	GO:0061428.value <= threshold=1.6541950702667236
node_4: feature_name=GO:0050911	GO:0050911.value <= threshold=9.647738242579695e-06
node_5: feature_name=GO:0006461	GO:0006461.value <= threshold=0.0025558413472026587
node_6: feature_name=GO:0044092	GO:0044092.value <= threshold=0.04476059600710869
node_7: feature_name=w189	w189.value <= threshold=0.051299501210451126
node_8: feature_name=GO:0097190	GO:0097190.value > threshold=0.13583728671073914
Class: BRCA
Rules_129	passed counts:5
node_0: feature_name=GO:0019002	GO:0019002.value <= threshold=0.44260887801647186
node_1: feature_name=GO:0031052	GO:0031052.value > threshold=1.5308658480644226
node_1165: feature_name=hsa05214	hsa05214.value > threshold=1.511171042919159
node_1493: feature_name=GO:0043560	GO:0043560.value <= threshold=1.633065402507782
node_1494: feature_name=GO:0031657	GO:0031657.value <= threshold=1.520110011100769
node_1495: feature_name=GO:0051310	GO:0051310.value <= threshold=0.865888774394989
node_1496: feature_name=w190	w190.value > threshold=0.35905349254608154
node_1510: feature_name=n387	n387.value <= threshold=-0.013395499903708696
node_1511: feature_name=GO:0042633	GO:0042633.value <= threshold=0.21441422402858734
node_1512: feature_name=n455	n455.value > threshold=0.025527500547468662
node_1524: feature_name=w185	w185.value <= threshold=-0.13375549763441086
node_1525: feature_name=GO:0071375	GO:0071375.value > threshold=0.21002883464097977
Class: OV
Rules_130	passed counts:5
node_0: feature_name=GO:0019002	GO:0019002.value <= threshold=0.44260887801647186
node_1: feature_name=GO:0031052	GO:0031052.value > threshold=1.5308658480644226
node_1165: feature_name=hsa05214	hsa05214.value > threshold=1.511171042919159
node_1493: feature_name=GO:0043560	GO:0043560.value <= threshold=1.633065402507782
node_1494: feature_name=GO:0031657	GO:0031657.value <= threshold=1.520110011100769
node_1495: feature_name=GO:0051310	GO:0051310.value <= threshold=0.865888774394989
node_1496: feature_name=w190	w190.value <= threshold=0.35905349254608154
node_1497: feature_name=GO:1901991	GO:1901991.value > threshold=0.4439539909362793
node_1499: feature_name=GO:0043966	GO:0043966.value <= threshold=0.39691686630249023
node_1500: feature_name=n45	n45.value > threshold=0.0560929998755455
Class: GBM
Rules_131	passed counts:5
node_0: feature_name=GO:0019002	GO:0019002.value <= threshold=0.44260887801647186
node_1: feature_name=GO:0031052	GO:0031052.value > threshold=1.5308658480644226
node_1165: feature_name=hsa05214	hsa05214.value <= threshold=1.511171042919159
node_1166: feature_name=GO:0042772	GO:0042772.value > threshold=1.405928909778595
node_1312: feature_name=GO:0007141	GO:0007141.value <= threshold=1.2595189213752747
node_1313: feature_name=GO:0031056	GO:0031056.value > threshold=0.5744103491306305
node_1323: feature_name=GO:0032101	GO:0032101.value <= threshold=1.6673882603645325
node_1324: feature_name=GO:0001508	GO:0001508.value <= threshold=1.8742843270301819
node_1325: feature_name=GO:0007399	GO:0007399.value > threshold=0.16499362885951996
node_1345: feature_name=GO:0022404	GO:0022404.value > threshold=0.16996821761131287
node_1425: feature_name=n266	n266.value > threshold=-0.01601500017568469
node_1433: feature_name=n298	n298.value <= threshold=-0.021350999362766743
node_1434: feature_name=GO:0014065	GO:0014065.value > threshold=0.5196231603622437
node_1452: feature_name=GO:0002694	GO:0002694.value <= threshold=0.6671453416347504
Class: OV
Rules_132	passed counts:5
[truncated: 12,086 more rows]

## Sheet: Rules on mRMR feature list
Rules_0	passed counts:154
node_0: feature_name=GO:0019002	GO:0019002.value > threshold=0.44260887801647186
node_1878: feature_name=GO:0019002	GO:0019002.value > threshold=1.837906301021576
node_1916: feature_name=GO:0005943	GO:0005943.value <= threshold=2.334170937538147
node_1917: feature_name=GO:0019002	GO:0019002.value <= threshold=2.587051510810852
node_1918: feature_name=hsa05215	hsa05215.value > threshold=0.49044638872146606
node_1928: feature_name=GO:0035116	GO:0035116.value <= threshold=1.0427671670913696
node_1929: feature_name=GO:0046872	GO:0046872.value > threshold=0.017841171007603407
node_1933: feature_name=GO:0001711	GO:0001711.value <= threshold=1.2391029596328735
node_1934: feature_name=GO:0048646	GO:0048646.value > threshold=0.0765364058315754
node_1942: feature_name=hsa04320	hsa04320.value <= threshold=3.589498996734619
node_1943: feature_name=w145	w145.value > threshold=-0.17155199497938156
node_1945: feature_name=GO:0072498	GO:0072498.value <= threshold=1.4140485525131226
node_1946: feature_name=GO:0050803	GO:0050803.value <= threshold=4.4351112842559814
node_1947: feature_name=GO:0070412	GO:0070412.value <= threshold=2.6406694650650024
Class: COADREAD
Rules_1	passed counts:114
node_0: feature_name=GO:0019002	GO:0019002.value <= threshold=0.44260887801647186
node_1: feature_name=GO:0031052	GO:0031052.value <= threshold=1.5308658480644226
node_2: feature_name=GO:0044028	GO:0044028.value > threshold=2.612712264060974
node_1368: feature_name=GO:0035112	GO:0035112.value <= threshold=0.8113309741020203
node_1369: feature_name=hsa04914	hsa04914.value > threshold=0.8201488554477692
node_1381: feature_name=GO:0050807	GO:0050807.value <= threshold=1.762468934059143
node_1382: feature_name=GO:0070601	GO:0070601.value <= threshold=1.0377094745635986
node_1383: feature_name=GO:0045202	GO:0045202.value <= threshold=2.046959400177002
node_1384: feature_name=GO:0034750	GO:0034750.value <= threshold=1.3575903177261353
node_1385: feature_name=GO:0044425	GO:0044425.value > threshold=0.0189127866178751
Class: BRCA
Rules_2	passed counts:103
node_0: feature_name=GO:0019002	GO:0019002.value <= threshold=0.44260887801647186
node_1: feature_name=GO:0031052	GO:0031052.value <= threshold=1.5308658480644226
node_2: feature_name=GO:0044028	GO:0044028.value <= threshold=2.612712264060974
node_3: feature_name=GO:0061428	GO:0061428.value > threshold=1.6541950702667236
node_1357: feature_name=GO:0050821	GO:0050821.value > threshold=0.18271653354167938
node_1363: feature_name=GO:0046685	GO:0046685.value <= threshold=1.2819058895111084
node_1364: feature_name=GO:0052745	GO:0052745.value <= threshold=1.5393913984298706
Class: KIRC
Rules_3	passed counts:82
node_0: feature_name=GO:0019002	GO:0019002.value <= threshold=0.44260887801647186
node_1: feature_name=GO:0031052	GO:0031052.value <= threshold=1.5308658480644226
node_2: feature_name=GO:0044028	GO:0044028.value <= threshold=2.612712264060974
node_3: feature_name=GO:0061428	GO:0061428.value <= threshold=1.6541950702667236
node_4: feature_name=hsa05210	hsa05210.value <= threshold=0.010015622712671757
node_5: feature_name=GO:0051049	GO:0051049.value > threshold=0.001117223291657865
node_85: feature_name=GO:0031657	GO:0031657.value <= threshold=1.516840398311615
node_86: feature_name=GO:0044030	GO:0044030.value <= threshold=1.7840761542320251
node_87: feature_name=GO:0004872	GO:0004872.value <= threshold=0.6798067986965179
node_88: feature_name=GO:0019899	GO:0019899.value > threshold=0.005233323434367776
node_122: feature_name=GO:0042391	GO:0042391.value <= threshold=0.38280558586120605
node_123: feature_name=GO:0005886	GO:0005886.value <= threshold=0.42232681810855865
node_124: feature_name=hsa04726	hsa04726.value <= threshold=0.9402436017990112
node_125: feature_name=GO:0048869	GO:0048869.value <= threshold=1.0812776684761047
node_126: feature_name=w45	w45.value <= threshold=0.3547459989786148
node_127: feature_name=GO:0005261	GO:0005261.value <= threshold=0.5224916040897369
node_128: feature_name=GO:1990440	GO:1990440.value <= threshold=0.6382570266723633
node_129: feature_name=w34	w34.value > threshold=-0.11230599880218506
node_143: feature_name=GO:0007063	GO:0007063.value <= threshold=1.8215383887290955
node_144: feature_name=GO:0098590	GO:0098590.value <= threshold=1.4683318734169006
node_145: feature_name=GO:0035176	GO:0035176.value <= threshold=1.1258912086486816
node_146: feature_name=GO:0040014	GO:0040014.value <= threshold=1.0648278892040253
node_147: feature_name=hsa05414	hsa05414.value <= threshold=1.6563720703125
node_148: feature_name=GO:0007268	GO:0007268.value <= threshold=1.13457453250885
node_149: feature_name=w189	w189.value > threshold=0.02042499929666519
node_157: feature_name=hsa05218	hsa05218.value <= threshold=0.9688911437988281
node_158: feature_name=GO:0098609	GO:0098609.value <= threshold=2.516038656234741
node_159: feature_name=GO:0003306	GO:0003306.value <= threshold=1.6652093529701233
node_160: feature_name=GO:0048644	GO:0048644.value <= threshold=1.9317954778671265
node_161: feature_name=GO:0007399	GO:0007399.value > threshold=0.0046656071208417416
node_163: feature_name=hsa04668	hsa04668.value <= threshold=0.8578968644142151
Class: KIRC
Rules_4	passed counts:66
node_0: feature_name=GO:0019002	GO:0019002.value <= threshold=0.44260887801647186
node_1: feature_name=GO:0031052	GO:0031052.value > threshold=1.5308658480644226
node_1395: feature_name=hsa05214	hsa05214.value <= threshold=1.511171042919159
node_1396: feature_name=GO:0042772	GO:0042772.value > threshold=1.405928909778595
node_1554: feature_name=GO:0001508	GO:0001508.value <= threshold=1.8742843270301819
node_1555: feature_name=GO:0010484	GO:0010484.value <= threshold=1.9488680958747864
node_1556: feature_name=GO:2000378	GO:2000378.value > threshold=0.9872501492500305
node_1574: feature_name=GO:0007399	GO:0007399.value > threshold=0.16499362885951996
node_1598: feature_name=GO:0046872	GO:0046872.value > threshold=0.3268098682165146
node_1612: feature_name=GO:0010718	GO:0010718.value <= threshold=0.28714585304260254
node_1613: feature_name=w34	w34.value <= threshold=-0.05662799999117851
node_1614: feature_name=GO:0005218	GO:0005218.value <= threshold=1.6784935593605042
node_1615: feature_name=GO:0050803	GO:0050803.value <= threshold=1.5598508715629578
node_1616: feature_name=GO:0065009	GO:0065009.value <= threshold=1.500328779220581
node_1617: feature_name=GO:0010560	GO:0010560.value <= threshold=0.6494271755218506
node_1618: feature_name=GO:0042771	GO:0042771.value <= threshold=2.4345216751098633
node_1619: feature_name=GO:0036211	GO:0036211.value <= threshold=1.2838587164878845
node_1620: feature_name=GO:0034594	GO:0034594.value <= threshold=1.0228062868118286
node_1621: feature_name=GO:0060415	GO:0060415.value <= threshold=1.588742434978485
node_1622: feature_name=n419	n419.value <= threshold=-0.011272999690845609
node_1623: feature_name=GO:0007062	GO:0007062.value <= threshold=1.5100874304771423
node_1624: feature_name=w41	w41.value <= threshold=-0.0817744992673397
node_1625: feature_name=GO:0009628	GO:0009628.value > threshold=0.043740030378103256
node_1627: feature_name=GO:0030154	GO:0030154.value > threshold=0.09911063872277737
Class: OV
Rules_5	passed counts:53
node_0: feature_name=GO:0019002	GO:0019002.value <= threshold=0.44260887801647186
node_1: feature_name=GO:0031052	GO:0031052.value > threshold=1.5308658480644226
node_1395: feature_name=hsa05214	hsa05214.value <= threshold=1.511171042919159
node_1396: feature_name=GO:0042772	GO:0042772.value > threshold=1.405928909778595
node_1554: feature_name=GO:0001508	GO:0001508.value <= threshold=1.8742843270301819
node_1555: feature_name=GO:0010484	GO:0010484.value > threshold=1.9488680958747864
node_1723: feature_name=GO:0036211	GO:0036211.value <= threshold=1.6254581809043884
node_1724: feature_name=GO:0060429	GO:0060429.value > threshold=0.3456886261701584
node_1732: feature_name=GO:0045992	GO:0045992.value <= threshold=1.1439657807350159
node_1733: feature_name=GO:0051455	GO:0051455.value <= threshold=3.870649218559265
node_1734: feature_name=GO:0045475	GO:0045475.value <= threshold=1.5866779685020447
Class: OV
Rules_6	passed counts:48
node_0: feature_name=GO:0019002	GO:0019002.value <= threshold=0.44260887801647186
node_1: feature_name=GO:0031052	GO:0031052.value > threshold=1.5308658480644226
node_1395: feature_name=hsa05214	hsa05214.value <= threshold=1.511171042919159
node_1396: feature_name=GO:0042772	GO:0042772.value > threshold=1.405928909778595
node_1554: feature_name=GO:0001508	GO:0001508.value <= threshold=1.8742843270301819
node_1555: feature_name=GO:0010484	GO:0010484.value <= threshold=1.9488680958747864
node_1556: feature_name=GO:2000378	GO:2000378.value > threshold=0.9872501492500305
node_1574: feature_name=GO:0007399	GO:0007399.value > threshold=0.16499362885951996
node_1598: feature_name=GO:0046872	GO:0046872.value <= threshold=0.3268098682165146
node_1599: feature_name=GO:0001508	GO:0001508.value <= threshold=1.5689859986305237
node_1600: feature_name=GO:0048731	GO:0048731.value > threshold=0.09385724738240242
node_1604: feature_name=GO:0048715	GO:0048715.value <= threshold=1.7180817127227783
node_1605: feature_name=GO:0006661	GO:0006661.value <= threshold=0.9911278486251831
node_1606: feature_name=GO:0070601	GO:0070601.value <= threshold=2.0891120433807373
Class: OV
Rules_7	passed counts:47
node_0: feature_name=GO:0019002	GO:0019002.value <= threshold=0.44260887801647186
node_1: feature_name=GO:0031052	GO:0031052.value <= threshold=1.5308658480644226
node_2: feature_name=GO:0044028	GO:0044028.value <= threshold=2.612712264060974
node_3: feature_name=GO:0061428	GO:0061428.value <= threshold=1.6541950702667236
node_4: feature_name=hsa05210	hsa05210.value <= threshold=0.010015622712671757
node_5: feature_name=GO:0051049	GO:0051049.value > threshold=0.001117223291657865
node_85: feature_name=GO:0031657	GO:0031657.value > threshold=1.516840398311615
node_793: feature_name=GO:0005886	GO:0005886.value > threshold=0.3016975224018097
node_805: feature_name=GO:0031645	GO:0031645.value <= threshold=1.7989141941070557
node_806: feature_name=GO:0003159	GO:0003159.value <= threshold=0.6591152548789978
node_807: feature_name=GO:0010092	GO:0010092.value <= threshold=1.2332872152328491
node_808: feature_name=GO:0030016	GO:0030016.value <= threshold=3.2980750799179077
node_809: feature_name=GO:0051606	GO:0051606.value > threshold=0.017848659306764603
node_817: feature_name=GO:0005575	GO:0005575.value <= threshold=0.9542773067951202
node_818: feature_name=GO:0005549	GO:0005549.value <= threshold=0.9189085066318512
node_819: feature_name=GO:2000026	GO:2000026.value <= threshold=2.307054340839386
Class: GBM
Rules_8	passed counts:40
node_0: feature_name=GO:0019002	GO:0019002.value <= threshold=0.44260887801647186
node_1: feature_name=GO:0031052	GO:0031052.value <= threshold=1.5308658480644226
node_2: feature_name=GO:0044028	GO:0044028.value <= threshold=2.612712264060974
node_3: feature_name=GO:0061428	GO:0061428.value <= threshold=1.6541950702667236
node_4: feature_name=hsa05210	hsa05210.value > threshold=0.010015622712671757
node_842: feature_name=GO:0051717	GO:0051717.value <= threshold=0.5213537216186523
node_843: feature_name=hsa04740	hsa04740.value <= threshold=0.4976523220539093
node_844: feature_name=GO:0007608	GO:0007608.value > threshold=4.729525570201787e-05
node_940: feature_name=GO:0007275	GO:0007275.value <= threshold=3.126664400100708
node_941: feature_name=GO:0006306	GO:0006306.value > threshold=0.3354291766881943
node_1061: feature_name=hsa05218	hsa05218.value > threshold=0.3431559354066849
node_1087: feature_name=GO:0048812	GO:0048812.value > threshold=0.37602490186691284
node_1109: feature_name=GO:0030539	GO:0030539.value <= threshold=0.9518836438655853
node_1110: feature_name=GO:0065009	GO:0065009.value > threshold=0.22621223330497742
node_1128: feature_name=hsa04740	hsa04740.value > threshold=0.00947558181360364
node_1132: feature_name=GO:0098590	GO:0098590.value > threshold=0.4255889356136322
node_1144: feature_name=GO:0007600	GO:0007600.value > threshold=0.038353798910975456
node_1150: feature_name=GO:0046872	GO:0046872.value > threshold=0.25897540897130966
node_1154: feature_name=GO:0001508	GO:0001508.value <= threshold=2.059730887413025
Class: HNSC
Rules_9	passed counts:38
node_0: feature_name=GO:0019002	GO:0019002.value <= threshold=0.44260887801647186
node_1: feature_name=GO:0031052	GO:0031052.value <= threshold=1.5308658480644226
node_2: feature_name=GO:0044028	GO:0044028.value <= threshold=2.612712264060974
node_3: feature_name=GO:0061428	GO:0061428.value <= threshold=1.6541950702667236
node_4: feature_name=hsa05210	hsa05210.value > threshold=0.010015622712671757
node_842: feature_name=GO:0051717	GO:0051717.value > threshold=0.5213537216186523
node_1332: feature_name=GO:0097252	GO:0097252.value <= threshold=0.2932630777359009
node_1333: feature_name=GO:0005575	GO:0005575.value > threshold=0.08128957077860832
node_1339: feature_name=GO:0007420	GO:0007420.value > threshold=0.3572447746992111
node_1345: feature_name=GO:0044028	GO:0044028.value <= threshold=2.2415701150894165
Class: UCEC
Rules_10	passed counts:33
node_0: feature_name=GO:0019002	GO:0019002.value <= threshold=0.44260887801647186
node_1: feature_name=GO:0031052	GO:0031052.value <= threshold=1.5308658480644226
node_2: feature_name=GO:0044028	GO:0044028.value <= threshold=2.612712264060974
node_3: feature_name=GO:0061428	GO:0061428.value <= threshold=1.6541950702667236
node_4: feature_name=hsa05210	hsa05210.value > threshold=0.010015622712671757
node_842: feature_name=GO:0051717	GO:0051717.value <= threshold=0.5213537216186523
node_843: feature_name=hsa04740	hsa04740.value <= threshold=0.4976523220539093
node_844: feature_name=GO:0007608	GO:0007608.value > threshold=4.729525570201787e-05
node_940: feature_name=GO:0007275	GO:0007275.value > threshold=3.126664400100708
node_1162: feature_name=GO:0016021	GO:0016021.value > threshold=0.35144393146038055
node_1174: feature_name=hsa04973	hsa04973.value <= threshold=0.8747977316379547
node_1175: feature_name=GO:0008630	GO:0008630.value <= threshold=1.226047396659851
node_1176: feature_name=GO:0051198	GO:0051198.value <= threshold=1.669399619102478
node_1177: feature_name=GO:0006305	GO:0006305.value <= threshold=1.387952446937561
node_1178: feature_name=GO:0097107	GO:0097107.value <= threshold=0.929146409034729
Class: COADREAD
Rules_11	passed counts:31
node_0: feature_name=GO:0019002	GO:0019002.value > threshold=0.44260887801647186
node_1878: feature_name=GO:0019002	GO:0019002.value <= threshold=1.837906301021576
node_1879: feature_name=GO:0007608	GO:0007608.value > threshold=0.7746693193912506
node_1907: feature_name=GO:0005943	GO:0005943.value <= threshold=0.24364860355854034
node_1908: feature_name=GO:0097107	GO:0097107.value <= threshold=1.1399232149124146
Class: LUAD
Rules_12	passed counts:25
node_0: feature_name=GO:0019002	GO:0019002.value <= threshold=0.44260887801647186
node_1: feature_name=GO:0031052	GO:0031052.value > threshold=1.5308658480644226
node_1395: feature_name=hsa05214	hsa05214.value <= threshold=1.511171042919159
node_1396: feature_name=GO:0042772	GO:0042772.value <= threshold=1.405928909778595
node_1397: feature_name=GO:0010661	GO:0010661.value <= threshold=0.293410062789917
node_1398: feature_name=GO:0050821	GO:0050821.value <= threshold=0.07515227049589157
node_1399: feature_name=GO:0007420	GO:0007420.value > threshold=0.09043607115745544
node_1409: feature_name=GO:0044346	GO:0044346.value <= threshold=0.5568181872367859
node_1410: feature_name=GO:0048869	GO:0048869.value > threshold=0.13266774266958237
node_1414: feature_name=GO:0007606	GO:0007606.value <= threshold=1.0170639753341675
Class: OV
Rules_13	passed counts:25
node_0: feature_name=GO:0019002	GO:0019002.value <= threshold=0.44260887801647186
node_1: feature_name=GO:0031052	GO:0031052.value <= threshold=1.5308658480644226
node_2: feature_name=GO:0044028	GO:0044028.value <= threshold=2.612712264060974
node_3: feature_name=GO:0061428	GO:0061428.value <= threshold=1.6541950702667236
node_4: feature_name=hsa05210	hsa05210.value > threshold=0.010015622712671757
node_842: feature_name=GO:0051717	GO:0051717.value <= threshold=0.5213537216186523
node_843: feature_name=hsa04740	hsa04740.value > threshold=0.4976523220539093
node_1195: feature_name=hsa05210	hsa05210.value <= threshold=0.4788101613521576
node_1196: feature_name=GO:0009648	GO:0009648.value > threshold=0.6887803077697754
node_1230: feature_name=hsa04730	hsa04730.value <= threshold=1.604251205921173
node_1231: feature_name=GO:0050803	GO:0050803.value > threshold=0.06393948756158352
Class: LUSC
Rules_14	passed counts:25
node_0: feature_name=GO:0019002	GO:0019002.value <= threshold=0.44260887801647186
node_1: feature_name=GO:0031052	GO:0031052.value <= threshold=1.5308658480644226
node_2: feature_name=GO:0044028	GO:0044028.value <= threshold=2.612712264060974
node_3: feature_name=GO:0061428	GO:0061428.value <= threshold=1.6541950702667236
node_4: feature_name=hsa05210	hsa05210.value <= threshold=0.010015622712671757
node_5: feature_name=GO:0051049	GO:0051049.value <= threshold=0.001117223291657865
node_6: feature_name=hsa05221	hsa05221.value > threshold=1.3642892241477966
Class: LAML
Rules_15	passed counts:23
node_0: feature_name=GO:0019002	GO:0019002.value <= threshold=0.44260887801647186
node_1: feature_name=GO:0031052	GO:0031052.value > threshold=1.5308658480644226
node_1395: feature_name=hsa05214	hsa05214.value > threshold=1.511171042919159
node_1751: feature_name=GO:0043560	GO:0043560.value <= threshold=1.633065402507782
node_1752: feature_name=GO:0031657	GO:0031657.value > threshold=1.520110011100769
node_1826: feature_name=GO:0048599	GO:0048599.value <= threshold=0.41843128204345703
node_1827: feature_name=GO:0071944	GO:0071944.value > threshold=0.47054363787174225
node_1837: feature_name=GO:0007610	GO:0007610.value <= threshold=2.2490274906158447
node_1838: feature_name=GO:0098590	GO:0098590.value <= threshold=3.014926791191101
node_1839: feature_name=GO:0022610	GO:0022610.value > threshold=0.17508062347769737
Class: GBM
Rules_16	passed counts:23
node_0: feature_name=GO:0019002	GO:0019002.value <= threshold=0.44260887801647186
node_1: feature_name=GO:0031052	GO:0031052.value <= threshold=1.5308658480644226
node_2: feature_name=GO:0044028	GO:0044028.value > threshold=2.612712264060974
node_1368: feature_name=GO:0035112	GO:0035112.value > threshold=0.8113309741020203
Class: UCEC
Rules_17	passed counts:23
node_0: feature_name=GO:0019002	GO:0019002.value <= threshold=0.44260887801647186
node_1: feature_name=GO:0031052	GO:0031052.value <= threshold=1.5308658480644226
node_2: feature_name=GO:0044028	GO:0044028.value <= threshold=2.612712264060974
node_3: feature_name=GO:0061428	GO:0061428.value <= threshold=1.6541950702667236
node_4: feature_name=hsa05210	hsa05210.value <= threshold=0.010015622712671757
node_5: feature_name=GO:0051049	GO:0051049.value <= threshold=0.001117223291657865
node_6: feature_name=hsa05221	hsa05221.value <= threshold=1.3642892241477966
node_7: feature_name=GO:0032990	GO:0032990.value <= threshold=0.04031727463006973
node_8: feature_name=GO:0065009	GO:0065009.value <= threshold=0.6329489052295685
node_9: feature_name=GO:0031012	GO:0031012.value <= threshold=1.4408089518547058
node_10: feature_name=GO:0005886	GO:0005886.value <= threshold=0.782217800617218
node_11: feature_name=GO:0005575	GO:0005575.value > threshold=0.03577663376927376
node_31: feature_name=GO:0048699	GO:0048699.value <= threshold=0.6653110682964325
Class: LAML
Rules_18	passed counts:22
node_0: feature_name=GO:0019002	GO:0019002.value <= threshold=0.44260887801647186
node_1: feature_name=GO:0031052	GO:0031052.value <= threshold=1.5308658480644226
node_2: feature_name=GO:0044028	GO:0044028.value <= threshold=2.612712264060974
node_3: feature_name=GO:0061428	GO:0061428.value <= threshold=1.6541950702667236
node_4: feature_name=hsa05210	hsa05210.value > threshold=0.010015622712671757
node_842: feature_name=GO:0051717	GO:0051717.value <= threshold=0.5213537216186523
node_843: feature_name=hsa04740	hsa04740.value > threshold=0.4976523220539093
node_1195: feature_name=hsa05210	hsa05210.value <= threshold=0.4788101613521576
node_1196: feature_name=GO:0009648	GO:0009648.value <= threshold=0.6887803077697754
node_1197: feature_name=GO:0007416	GO:0007416.value <= threshold=1.1743865609169006
node_1198: feature_name=GO:0000904	GO:0000904.value <= threshold=1.7905704379081726
node_1199: feature_name=GO:2000573	GO:2000573.value <= threshold=0.8695433139801025
node_1200: feature_name=GO:0048643	GO:0048643.value <= threshold=0.435030460357666
node_1201: feature_name=GO:0030154	GO:0030154.value > threshold=0.3104184567928314
node_1205: feature_name=GO:0061324	GO:0061324.value <= threshold=0.5562925338745117
Class: LUSC
Rules_19	passed counts:21
node_0: feature_name=GO:0019002	GO:0019002.value <= threshold=0.44260887801647186
node_1: feature_name=GO:0031052	GO:0031052.value <= threshold=1.5308658480644226
node_2: feature_name=GO:0044028	GO:0044028.value <= threshold=2.612712264060974
node_3: feature_name=GO:0061428	GO:0061428.value <= threshold=1.6541950702667236
node_4: feature_name=hsa05210	hsa05210.value > threshold=0.010015622712671757
node_842: feature_name=GO:0051717	GO:0051717.value <= threshold=0.5213537216186523
node_843: feature_name=hsa04740	hsa04740.value > threshold=0.4976523220539093
node_1195: feature_name=hsa05210	hsa05210.value > threshold=0.4788101613521576
node_1237: feature_name=GO:0005218	GO:0005218.value > threshold=0.7114565074443817
node_1295: feature_name=GO:0031294	GO:0031294.value <= threshold=0.4541195034980774
node_1296: feature_name=GO:0060571	GO:0060571.value <= threshold=0.1679871380329132
node_1297: feature_name=GO:0006113	GO:0006113.value <= threshold=1.7104033827781677
node_1298: feature_name=GO:0044456	GO:0044456.value > threshold=0.3023900240659714
node_1302: feature_name=GO:2000144	GO:2000144.value <= threshold=0.5966947972774506
node_1303: feature_name=n419	n419.value > threshold=-0.041195500642061234
node_1307: feature_name=GO:0010225	GO:0010225.value <= threshold=1.5362359285354614
Class: LUSC
Rules_20	passed counts:21
node_0: feature_name=GO:0019002	GO:0019002.value <= threshold=0.44260887801647186
node_1: feature_name=GO:0031052	GO:0031052.value <= threshold=1.5308658480644226
node_2: feature_name=GO:0044028	GO:0044028.value <= threshold=2.612712264060974
node_3: feature_name=GO:0061428	GO:0061428.value <= threshold=1.6541950702667236
node_4: feature_name=hsa05210	hsa05210.value > threshold=0.010015622712671757
node_842: feature_name=GO:0051717	GO:0051717.value <= threshold=0.5213537216186523
node_843: feature_name=hsa04740	hsa04740.value <= threshold=0.4976523220539093
node_844: feature_name=GO:0007608	GO:0007608.value <= threshold=4.729525570201787e-05
node_845: feature_name=GO:0060572	GO:0060572.value <= threshold=0.08363711833953857
node_846: feature_name=GO:0090199	GO:0090199.value <= threshold=0.9668825268745422
node_847: feature_name=GO:0048715	GO:0048715.value <= threshold=1.045529842376709
node_848: feature_name=w182	w182.value <= threshold=0.2845204919576645
node_849: feature_name=GO:0046873	GO:0046873.value <= threshold=0.4909472167491913
node_850: feature_name=hsa04930	hsa04930.value <= threshold=0.8952702581882477
node_851: feature_name=GO:0022610	GO:0022610.value <= threshold=2.43313729763031
node_852: feature_name=GO:0044449	GO:0044449.value <= threshold=2.559023141860962
node_853: feature_name=GO:0009653	GO:0009653.value > threshold=0.05581622198224068
node_855: feature_name=GO:0042762	GO:0042762.value <= threshold=1.4634478688240051
Class: KIRC
Rules_21	passed counts:20
node_0: feature_name=GO:0019002	GO:0019002.value > threshold=0.44260887801647186
node_1878: feature_name=GO:0019002	GO:0019002.value <= threshold=1.837906301021576
node_1879: feature_name=GO:0007608	GO:0007608.value <= threshold=0.7746693193912506
node_1880: feature_name=GO:0007275	GO:0007275.value > threshold=2.779351592063904
node_1898: feature_name=GO:0007610	GO:0007610.value > threshold=0.47150708734989166
node_1902: feature_name=GO:0031224	GO:0031224.value > threshold=0.09846900030970573
node_1904: feature_name=hsa04923	hsa04923.value > threshold=0.07611863315105438
Class: COADREAD
Rules_22	passed counts:20
node_0: feature_name=GO:0019002	GO:0019002.value <= threshold=0.44260887801647186
node_1: feature_name=GO:0031052	GO:0031052.value > threshold=1.5308658480644226
node_1395: feature_name=hsa05214	hsa05214.value > threshold=1.511171042919159
node_1751: feature_name=GO:0043560	GO:0043560.value <= threshold=1.633065402507782
node_1752: feature_name=GO:0031657	GO:0031657.value <= threshold=1.520110011100769
node_1753: feature_name=GO:0010225	GO:0010225.value <= threshold=3.0487908124923706
node_1754: feature_name=GO:0003266	GO:0003266.value <= threshold=1.4739093780517578
node_1755: feature_name=GO:0050807	GO:0050807.value > threshold=0.2123531550168991
node_1793: feature_name=hsa05100	hsa05100.value <= threshold=0.6015401780605316
node_1794: feature_name=GO:0060571	GO:0060571.value <= threshold=1.0067874193191528
node_1795: feature_name=GO:0043218	GO:0043218.value <= threshold=0.6651293635368347
node_1796: feature_name=GO:0006928	GO:0006928.value > threshold=0.30935145169496536
Class: COADREAD
Rules_23	passed counts:19
node_0: feature_name=GO:0019002	GO:0019002.value > threshold=0.44260887801647186
node_1878: feature_name=GO:0019002	GO:0019002.value <= threshold=1.837906301021576
node_1879: feature_name=GO:0007608	GO:0007608.value <= threshold=0.7746693193912506
node_1880: feature_name=GO:0007275	GO:0007275.value <= threshold=2.779351592063904
node_1881: feature_name=hsa00562	hsa00562.value > threshold=0.5940376818180084
node_1893: feature_name=hsa05218	hsa05218.value > threshold=0.38684506714344025
node_1895: feature_name=hsa04620	hsa04620.value <= threshold=1.3346280455589294
Class: UCEC
Rules_24	passed counts:18
node_0: feature_name=GO:0019002	GO:0019002.value <= threshold=0.44260887801647186
node_1: feature_name=GO:0031052	GO:0031052.value <= threshold=1.5308658480644226
node_2: feature_name=GO:0044028	GO:0044028.value <= threshold=2.612712264060974
node_3: feature_name=GO:0061428	GO:0061428.value <= threshold=1.6541950702667236
node_4: feature_name=hsa05210	hsa05210.value > threshold=0.010015622712671757
node_842: feature_name=GO:0051717	GO:0051717.value <= threshold=0.5213537216186523
node_843: feature_name=hsa04740	hsa04740.value > threshold=0.4976523220539093
node_1195: feature_name=hsa05210	hsa05210.value <= threshold=0.4788101613521576
node_1196: feature_name=GO:0009648	GO:0009648.value <= threshold=0.6887803077697754
node_1197: feature_name=GO:0007416	GO:0007416.value > threshold=1.1743865609169006
node_1217: feature_name=GO:0071322	GO:0071322.value <= threshold=0.6149432063102722
node_1218: feature_name=w41	w41.value > threshold=-0.14639049768447876
node_1222: feature_name=hsa05214	hsa05214.value <= threshold=0.9501020312309265
node_1223: feature_name=GO:0035112	GO:0035112.value <= threshold=0.8407403230667114
Class: LUAD
Rules_25	passed counts:18
node_0: feature_name=GO:0019002	GO:0019002.value <= threshold=0.44260887801647186
node_1: feature_name=GO:0031052	GO:0031052.value <= threshold=1.5308658480644226
node_2: feature_name=GO:0044028	GO:0044028.value <= threshold=2.612712264060974
node_3: feature_name=GO:0061428	GO:0061428.value <= threshold=1.6541950702667236
node_4: feature_name=hsa05210	hsa05210.value <= threshold=0.010015622712671757
node_5: feature_name=GO:0051049	GO:0051049.value > threshold=0.001117223291657865
node_85: feature_name=GO:0031657	GO:0031657.value <= threshold=1.516840398311615
node_86: feature_name=GO:0044030	GO:0044030.value > threshold=1.7840761542320251
Class: LAML
Rules_26	passed counts:18
node_0: feature_name=GO:0019002	GO:0019002.value <= threshold=0.44260887801647186
node_1: feature_name=GO:0031052	GO:0031052.value <= threshold=1.5308658480644226
node_2: feature_name=GO:0044028	GO:0044028.value <= threshold=2.612712264060974
node_3: feature_name=GO:0061428	GO:0061428.value <= threshold=1.6541950702667236
node_4: feature_name=hsa05210	hsa05210.value <= threshold=0.010015622712671757
node_5: feature_name=GO:0051049	GO:0051049.value > threshold=0.001117223291657865
node_85: feature_name=GO:0031657	GO:0031657.value <= threshold=1.516840398311615
node_86: feature_name=GO:0044030	GO:0044030.value <= threshold=1.7840761542320251
node_87: feature_name=GO:0004872	GO:0004872.value > threshold=0.6798067986965179
node_575: feature_name=GO:0050907	GO:0050907.value <= threshold=1.8050302863121033
node_576: feature_name=n419	n419.value <= threshold=-0.044234998524188995
node_577: feature_name=GO:0031224	GO:0031224.value > threshold=0.4298471510410309
node_587: feature_name=GO:0051606	GO:0051606.value > threshold=0.1275605857372284
node_593: feature_name=GO:0007399	GO:0007399.value <= threshold=1.8710623979568481
node_594: feature_name=GO:0044085	GO:0044085.value > threshold=0.008928653551265597
Class: GBM
Rules_27	passed counts:17
node_0: feature_name=GO:0019002	GO:0019002.value <= threshold=0.44260887801647186
node_1: feature_name=GO:0031052	GO:0031052.value <= threshold=1.5308658480644226
node_2: feature_name=GO:0044028	GO:0044028.value <= threshold=2.612712264060974
node_3: feature_name=GO:0061428	GO:0061428.value <= threshold=1.6541950702667236
node_4: feature_name=hsa05210	hsa05210.value <= threshold=0.010015622712671757
node_5: feature_name=GO:0051049	GO:0051049.value > threshold=0.001117223291657865
node_85: feature_name=GO:0031657	GO:0031657.value <= threshold=1.516840398311615
node_86: feature_name=GO:0044030	GO:0044030.value <= threshold=1.7840761542320251
node_87: feature_name=GO:0004872	GO:0004872.value <= threshold=0.6798067986965179
node_88: feature_name=GO:0019899	GO:0019899.value > threshold=0.005233323434367776
node_122: feature_name=GO:0042391	GO:0042391.value > threshold=0.38280558586120605
node_394: feature_name=GO:0048589	GO:0048589.value <= threshold=0.0312800258398056
node_395: feature_name=GO:0051049	GO:0051049.value <= threshold=0.2129829227924347
node_396: feature_name=GO:0031674	GO:0031674.value <= threshold=1.336029291152954
node_397: feature_name=w145	w145.value > threshold=-0.15956750512123108
node_399: feature_name=GO:0002052	GO:0002052.value <= threshold=0.770967423915863
Class: BRCA
Rules_28	passed counts:17
node_0: feature_name=GO:0019002	GO:0019002.value <= threshold=0.44260887801647186
node_1: feature_name=GO:0031052	GO:0031052.value <= threshold=1.5308658480644226
node_2: feature_name=GO:0044028	GO:0044028.value <= threshold=2.612712264060974
node_3: feature_name=GO:0061428	GO:0061428.value <= threshold=1.6541950702667236
node_4: feature_name=hsa05210	hsa05210.value <= threshold=0.010015622712671757
node_5: feature_name=GO:0051049	GO:0051049.value > threshold=0.001117223291657865
node_85: feature_name=GO:0031657	GO:0031657.value <= threshold=1.516840398311615
node_86: feature_name=GO:0044030	GO:0044030.value <= threshold=1.7840761542320251
node_87: feature_name=GO:0004872	GO:0004872.value <= threshold=0.6798067986965179
node_88: feature_name=GO:0019899	GO:0019899.value > threshold=0.005233323434367776
node_122: feature_name=GO:0042391	GO:0042391.value <= threshold=0.38280558586120605
node_123: feature_name=GO:0005886	GO:0005886.value > threshold=0.42232681810855865
node_263: feature_name=GO:0043167	GO:0043167.value <= threshold=1.177414894104004
node_264: feature_name=GO:0010661	GO:0010661.value <= threshold=0.6713261604309082
node_265: feature_name=GO:0005575	GO:0005575.value > threshold=0.4431428909301758
node_327: feature_name=GO:0005509	GO:0005509.value <= threshold=0.6392751932144165
node_328: feature_name=GO:0023052	GO:0023052.value <= threshold=0.4051365852355957
Class: KIRC
Rules_29	passed counts:17
node_0: feature_name=GO:0019002	GO:0019002.value <= threshold=0.44260887801647186
node_1: feature_name=GO:0031052	GO:0031052.value <= threshold=1.5308658480644226
node_2: feature_name=GO:0044028	GO:0044028.value <= threshold=2.612712264060974
node_3: feature_name=GO:0061428	GO:0061428.value <= threshold=1.6541950702667236
node_4: feature_name=hsa05210	hsa05210.value <= threshold=0.010015622712671757
node_5: feature_name=GO:0051049	GO:0051049.value > threshold=0.001117223291657865
node_85: feature_name=GO:0031657	GO:0031657.value <= threshold=1.516840398311615
node_86: feature_name=GO:0044030	GO:0044030.value <= threshold=1.7840761542320251
node_87: feature_name=GO:0004872	GO:0004872.value <= threshold=0.6798067986965179
node_88: feature_name=GO:0019899	GO:0019899.value <= threshold=0.005233323434367776
node_89: feature_name=GO:0022803	GO:0022803.value <= threshold=0.5915473103523254
node_90: feature_name=GO:0006928	GO:0006928.value <= threshold=0.4957195371389389
node_91: feature_name=GO:0007420	GO:0007420.value <= threshold=0.7886840999126434
node_92: feature_name=GO:0035176	GO:0035176.value <= threshold=0.7347389459609985
Class: BRCA
Rules_30	passed counts:16
node_0: feature_name=GO:0019002	GO:0019002.value <= threshold=0.44260887801647186
node_1: feature_name=GO:0031052	GO:0031052.value > threshold=1.5308658480644226
node_1395: feature_name=hsa05214	hsa05214.value <= threshold=1.511171042919159
node_1396: feature_name=GO:0042772	GO:0042772.value > threshold=1.405928909778595
node_1554: feature_name=GO:0001508	GO:0001508.value <= threshold=1.8742843270301819
node_1555: feature_name=GO:0010484	GO:0010484.value <= threshold=1.9488680958747864
node_1556: feature_name=GO:2000378	GO:2000378.value > threshold=0.9872501492500305
node_1574: feature_name=GO:0007399	GO:0007399.value > threshold=0.16499362885951996
node_1598: feature_name=GO:0046872	GO:0046872.value > threshold=0.3268098682165146
node_1612: feature_name=GO:0010718	GO:0010718.value <= threshold=0.28714585304260254
node_1613: feature_name=w34	w34.value > threshold=-0.05662799999117851
node_1651: feature_name=GO:0018193	GO:0018193.value <= threshold=0.2722988724708557
node_1652: feature_name=GO:0048468	GO:0048468.value > threshold=0.15883290767669678
node_1654: feature_name=hsa04151	hsa04151.value > threshold=0.2954972982406616
Class: OV
Rules_31	passed counts:16
node_0: feature_name=GO:0019002	GO:0019002.value <= threshold=0.44260887801647186
node_1: feature_name=GO:0031052	GO:0031052.value <= threshold=1.5308658480644226
node_2: feature_name=GO:0044028	GO:0044028.value <= threshold=2.612712264060974
node_3: feature_name=GO:0061428	GO:0061428.value <= threshold=1.6541950702667236
node_4: feature_name=hsa05210	hsa05210.value <= threshold=0.010015622712671757
node_5: feature_name=GO:0051049	GO:0051049.value <= threshold=0.001117223291657865
node_6: feature_name=hsa05221	hsa05221.value <= threshold=1.3642892241477966
node_7: feature_name=GO:0032990	GO:0032990.value > threshold=0.04031727463006973
node_41: feature_name=GO:0032990	GO:0032990.value <= threshold=0.7532182037830353
node_42: feature_name=GO:0018193	GO:0018193.value <= threshold=0.3025086969137192
node_43: feature_name=GO:0043167	GO:0043167.value <= threshold=0.9739439785480499
node_44: feature_name=GO:0007610	GO:0007610.value <= threshold=0.7863469123840332
node_45: feature_name=GO:0044459	GO:0044459.value <= threshold=0.9784388542175293
node_46: feature_name=GO:0007399	GO:0007399.value > threshold=0.16791487485170364
node_50: feature_name=GO:0044346	GO:0044346.value <= threshold=1.0185585021972656
Class: BRCA
Rules_32	passed counts:15
node_0: feature_name=GO:0019002	GO:0019002.value <= threshold=0.44260887801647186
node_1: feature_name=GO:0031052	GO:0031052.value > threshold=1.5308658480644226
node_1395: feature_name=hsa05214	hsa05214.value <= threshold=1.511171042919159
node_1396: feature_name=GO:0042772	GO:0042772.value <= threshold=1.405928909778595
node_1397: feature_name=GO:0010661	GO:0010661.value > threshold=0.293410062789917
node_1427: feature_name=GO:1900119	GO:1900119.value > threshold=1.3893239498138428
node_1465: feature_name=GO:0042391	GO:0042391.value <= threshold=1.1939783096313477
node_1466: feature_name=GO:0007399	GO:0007399.value > threshold=0.13430748134851456
node_1470: feature_name=GO:0098655	GO:0098655.value > threshold=0.08384867757558823
node_1486: feature_name=GO:1902578	GO:1902578.value > threshold=0.21491818130016327
node_1494: feature_name=GO:0030018	GO:0030018.value <= threshold=0.4843136668205261
node_1495: feature_name=GO:0045333	GO:0045333.value <= threshold=0.4037990868091583
node_1496: feature_name=GO:0007167	GO:0007167.value > threshold=0.16650868952274323
node_1506: feature_name=GO:0048644	GO:0048644.value <= threshold=0.7279018759727478
Class: OV
Rules_33	passed counts:14
node_0: feature_name=GO:0019002	GO:0019002.value > threshold=0.44260887801647186
node_1878: feature_name=GO:0019002	GO:0019002.value > threshold=1.837906301021576
node_1916: feature_name=GO:0005943	GO:0005943.value > threshold=2.334170937538147
node_1978: feature_name=GO:0009611	GO:0009611.value <= threshold=2.143209218978882
node_1979: feature_name=GO:1902578	GO:1902578.value <= threshold=1.8699904084205627
Class: UCEC
Rules_34	passed counts:14
node_0: feature_name=GO:0019002	GO:0019002.value <= threshold=0.44260887801647186
node_1: feature_name=GO:0031052	GO:0031052.value <= threshold=1.5308658480644226
node_2: feature_name=GO:0044028	GO:0044028.value <= threshold=2.612712264060974
node_3: feature_name=GO:0061428	GO:0061428.value <= threshold=1.6541950702667236
node_4: feature_name=hsa05210	hsa05210.value > threshold=0.010015622712671757
node_842: feature_name=GO:0051717	GO:0051717.value <= threshold=0.5213537216186523
node_843: feature_name=hsa04740	hsa04740.value <= threshold=0.4976523220539093
node_844: feature_name=GO:0007608	GO:0007608.value > threshold=4.729525570201787e-05
node_940: feature_name=GO:0007275	GO:0007275.value <= threshold=3.126664400100708
node_941: feature_name=GO:0006306	GO:0006306.value <= threshold=0.3354291766881943
node_942: feature_name=GO:1902108	GO:1902108.value > threshold=0.09483636170625687
node_994: feature_name=GO:0035033	GO:0035033.value <= threshold=1.4224371314048767
node_995: feature_name=GO:0051606	GO:0051606.value > threshold=0.17514579743146896
node_1011: feature_name=GO:0051703	GO:0051703.value > threshold=0.24546979367733002
node_1033: feature_name=GO:0050907	GO:0050907.value > threshold=0.10338149964809418
Class: LUSC
Rules_35	passed counts:14
node_0: feature_name=GO:0019002	GO:0019002.value <= threshold=0.44260887801647186
node_1: feature_name=GO:0031052	GO:0031052.value <= threshold=1.5308658480644226
node_2: feature_name=GO:0044028	GO:0044028.value <= threshold=2.612712264060974
node_3: feature_name=GO:0061428	GO:0061428.value <= threshold=1.6541950702667236
node_4: feature_name=hsa05210	hsa05210.value > threshold=0.010015622712671757
node_842: feature_name=GO:0051717	GO:0051717.value <= threshold=0.5213537216186523
node_843: feature_name=hsa04740	hsa04740.value <= threshold=0.4976523220539093
node_844: feature_name=GO:0007608	GO:0007608.value > threshold=4.729525570201787e-05
node_940: feature_name=GO:0007275	GO:0007275.value <= threshold=3.126664400100708
node_941: feature_name=GO:0006306	GO:0006306.value <= threshold=0.3354291766881943
node_942: feature_name=GO:1902108	GO:1902108.value > threshold=0.09483636170625687
node_994: feature_name=GO:0035033	GO:0035033.value <= threshold=1.4224371314048767
node_995: feature_name=GO:0051606	GO:0051606.value <= threshold=0.17514579743146896
node_996: feature_name=w145	w145.value <= threshold=-0.11281650140881538
node_997: feature_name=hsa04919	hsa04919.value > threshold=0.25473929569125175
Class: BLCA
Rules_36	passed counts:13
node_0: feature_name=GO:0019002	GO:0019002.value > threshold=0.44260887801647186
node_1878: feature_name=GO:0019002	GO:0019002.value > threshold=1.837906301021576
node_1916: feature_name=GO:0005943	GO:0005943.value <= threshold=2.334170937538147
node_1917: feature_name=GO:0019002	GO:0019002.value <= threshold=2.587051510810852
node_1918: feature_name=hsa05215	hsa05215.value <= threshold=0.49044638872146606
node_1919: feature_name=hsa04740	hsa04740.value > threshold=0.12822064012289047
node_1923: feature_name=hsa04650	hsa04650.value > threshold=0.29127107560634613
Class: LUAD
Rules_37	passed counts:13
node_0: feature_name=GO:0019002	GO:0019002.value <= threshold=0.44260887801647186
node_1: feature_name=GO:0031052	GO:0031052.value <= threshold=1.5308658480644226
node_2: feature_name=GO:0044028	GO:0044028.value <= threshold=2.612712264060974
node_3: feature_name=GO:0061428	GO:0061428.value <= threshold=1.6541950702667236
node_4: feature_name=hsa05210	hsa05210.value <= threshold=0.010015622712671757
node_5: feature_name=GO:0051049	GO:0051049.value > threshold=0.001117223291657865
node_85: feature_name=GO:0031657	GO:0031657.value <= threshold=1.516840398311615
node_86: feature_name=GO:0044030	GO:0044030.value <= threshold=1.7840761542320251
node_87: feature_name=GO:0004872	GO:0004872.value > threshold=0.6798067986965179
node_575: feature_name=GO:0050907	GO:0050907.value <= threshold=1.8050302863121033
node_576: feature_name=n419	n419.value > threshold=-0.044234998524188995
node_598: feature_name=GO:0022838	GO:0022838.value > threshold=0.062499335035681725
node_634: feature_name=GO:0022008	GO:0022008.value <= threshold=2.9196107387542725
node_635: feature_name=GO:0043167	GO:0043167.value <= threshold=1.1558712124824524
node_636: feature_name=GO:0007186	GO:0007186.value <= threshold=0.8086933195590973
node_637: feature_name=w45	w45.value <= threshold=0.3224470019340515
node_638: feature_name=w34	w34.value <= threshold=-0.061434000730514526
node_639: feature_name=GO:0009628	GO:0009628.value > threshold=0.15095724910497665
Class: BRCA
Rules_38	passed counts:13
node_0: feature_name=GO:0019002	GO:0019002.value <= threshold=0.44260887801647186
node_1: feature_name=GO:0031052	GO:0031052.value <= threshold=1.5308658480644226
node_2: feature_name=GO:0044028	GO:0044028.value <= threshold=2.612712264060974
node_3: feature_name=GO:0061428	GO:0061428.value <= threshold=1.6541950702667236
node_4: feature_name=hsa05210	hsa05210.value <= threshold=0.010015622712671757
node_5: feature_name=GO:0051049	GO:0051049.value > threshold=0.001117223291657865
node_85: feature_name=GO:0031657	GO:0031657.value <= threshold=1.516840398311615
node_86: feature_name=GO:0044030	GO:0044030.value <= threshold=1.7840761542320251
node_87: feature_name=GO:0004872	GO:0004872.value <= threshold=0.6798067986965179
node_88: feature_name=GO:0019899	GO:0019899.value > threshold=0.005233323434367776
node_122: feature_name=GO:0042391	GO:0042391.value > threshold=0.38280558586120605
node_394: feature_name=GO:0048589	GO:0048589.value > threshold=0.0312800258398056
node_434: feature_name=GO:0048731	GO:0048731.value > threshold=0.19495543837547302
node_452: feature_name=hsa04530	hsa04530.value <= threshold=0.5746428370475769
node_453: feature_name=GO:0045595	GO:0045595.value <= threshold=1.769000768661499
node_454: feature_name=GO:0007156	GO:0007156.value <= threshold=1.0433965921401978
node_455: feature_name=GO:2000026	GO:2000026.value > threshold=0.18738730996847153
node_473: feature_name=GO:0098590	GO:0098590.value <= threshold=0.2749122530221939
node_474: feature_name=GO:0098589	GO:0098589.value > threshold=0.06498528085649014
Class: BRCA
Rules_39	passed counts:13
node_0: feature_name=GO:0019002	GO:0019002.value <= threshold=0.44260887801647186
node_1: feature_name=GO:0031052	GO:0031052.value <= threshold=1.5308658480644226
node_2: feature_name=GO:0044028	GO:0044028.value <= threshold=2.612712264060974
node_3: feature_name=GO:0061428	GO:0061428.value <= threshold=1.6541950702667236
node_4: feature_name=hsa05210	hsa05210.value <= threshold=0.010015622712671757
node_5: feature_name=GO:0051049	GO:0051049.value > threshold=0.001117223291657865
node_85: feature_name=GO:0031657	GO:0031657.value <= threshold=1.516840398311615
node_86: feature_name=GO:0044030	GO:0044030.value <= threshold=1.7840761542320251
node_87: feature_name=GO:0004872	GO:0004872.value <= threshold=0.6798067986965179
node_88: feature_name=GO:0019899	GO:0019899.value > threshold=0.005233323434367776
node_122: feature_name=GO:0042391	GO:0042391.value > threshold=0.38280558586120605
node_394: feature_name=GO:0048589	GO:0048589.value > threshold=0.0312800258398056
node_434: feature_name=GO:0048731	GO:0048731.value <= threshold=0.19495543837547302
node_435: feature_name=GO:0048731	GO:0048731.value > threshold=0.0868581235408783
node_447: feature_name=hsa04919	hsa04919.value <= threshold=1.1911337077617645
node_448: feature_name=GO:0015012	GO:0015012.value <= threshold=0.7635602951049805
Class: KIRC
Rules_40	passed counts:12
node_0: feature_name=GO:0019002	GO:0019002.value <= threshold=0.44260887801647186
node_1: feature_name=GO:0031052	GO:0031052.value > threshold=1.5308658480644226
node_1395: feature_name=hsa05214	hsa05214.value <= threshold=1.511171042919159
node_1396: feature_name=GO:0042772	GO:0042772.value <= threshold=1.405928909778595
node_1397: feature_name=GO:0010661	GO:0010661.value > threshold=0.293410062789917
node_1427: feature_name=GO:1900119	GO:1900119.value > threshold=1.3893239498138428
node_1465: feature_name=GO:0042391	GO:0042391.value > threshold=1.1939783096313477
node_1543: feature_name=GO:0009653	GO:0009653.value <= threshold=1.6952845454216003
node_1544: feature_name=GO:0048869	GO:0048869.value > threshold=0.2864624857902527
node_1548: feature_name=GO:0006302	GO:0006302.value <= threshold=2.2125394344329834
Class: COADREAD
Rules_41	passed counts:12
node_0: feature_name=GO:0019002	GO:0019002.value <= threshold=0.44260887801647186
node_1: feature_name=GO:0031052	GO:0031052.value <= threshold=1.5308658480644226
node_2: feature_name=GO:0044028	GO:0044028.value <= threshold=2.612712264060974
node_3: feature_name=GO:0061428	GO:0061428.value <= threshold=1.6541950702667236
node_4: feature_name=hsa05210	hsa05210.value > threshold=0.010015622712671757
node_842: feature_name=GO:0051717	GO:0051717.value <= threshold=0.5213537216186523
node_843: feature_name=hsa04740	hsa04740.value > threshold=0.4976523220539093
node_1195: feature_name=hsa05210	hsa05210.value > threshold=0.4788101613521576
node_1237: feature_name=GO:0005218	GO:0005218.value > threshold=0.7114565074443817
node_1295: feature_name=GO:0031294	GO:0031294.value <= threshold=0.4541195034980774
node_1296: feature_name=GO:0060571	GO:0060571.value > threshold=0.1679871380329132
node_1314: feature_name=GO:2000811	GO:2000811.value <= threshold=0.43714772164821625
node_1315: feature_name=GO:0060736	GO:0060736.value <= threshold=0.6384731531143188
Class: LUAD
Rules_42	passed counts:12
node_0: feature_name=GO:0019002	GO:0019002.value <= threshold=0.44260887801647186
node_1: feature_name=GO:0031052	GO:0031052.value <= threshold=1.5308658480644226
node_2: feature_name=GO:0044028	GO:0044028.value <= threshold=2.612712264060974
node_3: feature_name=GO:0061428	GO:0061428.value <= threshold=1.6541950702667236
node_4: feature_name=hsa05210	hsa05210.value <= threshold=0.010015622712671757
node_5: feature_name=GO:0051049	GO:0051049.value > threshold=0.001117223291657865
node_85: feature_name=GO:0031657	GO:0031657.value <= threshold=1.516840398311615
node_86: feature_name=GO:0044030	GO:0044030.value <= threshold=1.7840761542320251
node_87: feature_name=GO:0004872	GO:0004872.value <= threshold=0.6798067986965179
node_88: feature_name=GO:0019899	GO:0019899.value <= threshold=0.005233323434367776
node_89: feature_name=GO:0022803	GO:0022803.value > threshold=0.5915473103523254
node_105: feature_name=GO:0004930	GO:0004930.value <= threshold=0.02774178609251976
node_106: feature_name=w131	w131.value > threshold=0.10477250069379807
node_110: feature_name=GO:0031674	GO:0031674.value <= threshold=0.3557929992675781
Class: LAML
Rules_43	passed counts:12
node_0: feature_name=GO:0019002	GO:0019002.value <= threshold=0.44260887801647186
node_1: feature_name=GO:0031052	GO:0031052.value <= threshold=1.5308658480644226
node_2: feature_name=GO:0044028	GO:0044028.value <= threshold=2.612712264060974
node_3: feature_name=GO:0061428	GO:0061428.value <= threshold=1.6541950702667236
node_4: feature_name=hsa05210	hsa05210.value <= threshold=0.010015622712671757
node_5: feature_name=GO:0051049	GO:0051049.value <= threshold=0.001117223291657865
node_6: feature_name=hsa05221	hsa05221.value <= threshold=1.3642892241477966
node_7: feature_name=GO:0032990	GO:0032990.value <= threshold=0.04031727463006973
node_8: feature_name=GO:0065009	GO:0065009.value <= threshold=0.6329489052295685
node_9: feature_name=GO:0031012	GO:0031012.value <= threshold=1.4408089518547058
node_10: feature_name=GO:0005886	GO:0005886.value <= threshold=0.782217800617218
node_11: feature_name=GO:0005575	GO:0005575.value <= threshold=0.03577663376927376
node_12: feature_name=GO:0018193	GO:0018193.value <= threshold=0.6916398406028748
node_13: feature_name=GO:0051606	GO:0051606.value <= threshold=0.45754408836364746
node_14: feature_name=GO:0032501	GO:0032501.value > threshold=0.018109413445927203
Class: LAML
Rules_44	passed counts:11
node_0: feature_name=GO:0019002	GO:0019002.value <= threshold=0.44260887801647186
node_1: feature_name=GO:0031052	GO:0031052.value > threshold=1.5308658480644226
node_1395: feature_name=hsa05214	hsa05214.value > threshold=1.511171042919159
node_1751: feature_name=GO:0043560	GO:0043560.value > threshold=1.633065402507782
node_1851: feature_name=w182	w182.value > threshold=0.2966039925813675
node_1859: feature_name=hsa05213	hsa05213.value <= threshold=2.6327033042907715
node_1860: feature_name=GO:0004871	GO:0004871.value <= threshold=0.7568103969097137
Class: BRCA
Rules_45	passed counts:11
node_0: feature_name=GO:0019002	GO:0019002.value <= threshold=0.44260887801647186
node_1: feature_name=GO:0031052	GO:0031052.value <= threshold=1.5308658480644226
node_2: feature_name=GO:0044028	GO:0044028.value <= threshold=2.612712264060974
node_3: feature_name=GO:0061428	GO:0061428.value <= threshold=1.6541950702667236
node_4: feature_name=hsa05210	hsa05210.value > threshold=0.010015622712671757
node_842: feature_name=GO:0051717	GO:0051717.value <= threshold=0.5213537216186523
node_843: feature_name=hsa04740	hsa04740.value > threshold=0.4976523220539093
node_1195: feature_name=hsa05210	hsa05210.value > threshold=0.4788101613521576
node_1237: feature_name=GO:0005218	GO:0005218.value <= threshold=0.7114565074443817
node_1238: feature_name=GO:0007606	GO:0007606.value <= threshold=1.7004631757736206
node_1239: feature_name=GO:0006734	GO:0006734.value > threshold=0.3861302584409714
node_1277: feature_name=GO:0098590	GO:0098590.value > threshold=0.670199453830719
Class: HNSC
Rules_46	passed counts:11
node_0: feature_name=GO:0019002	GO:0019002.value <= threshold=0.44260887801647186
node_1: feature_name=GO:0031052	GO:0031052.value <= threshold=1.5308658480644226
node_2: feature_name=GO:0044028	GO:0044028.value <= threshold=2.612712264060974
node_3: feature_name=GO:0061428	GO:0061428.value <= threshold=1.6541950702667236
node_4: feature_name=hsa05210	hsa05210.value > threshold=0.010015622712671757
node_842: feature_name=GO:0051717	GO:0051717.value <= threshold=0.5213537216186523
node_843: feature_name=hsa04740	hsa04740.value <= threshold=0.4976523220539093
node_844: feature_name=GO:0007608	GO:0007608.value > threshold=4.729525570201787e-05
node_940: feature_name=GO:0007275	GO:0007275.value <= threshold=3.126664400100708
node_941: feature_name=GO:0006306	GO:0006306.value <= threshold=0.3354291766881943
node_942: feature_name=GO:1902108	GO:1902108.value <= threshold=0.09483636170625687
node_943: feature_name=hsa04150	hsa04150.value <= threshold=0.8822639584541321
node_944: feature_name=hsa05210	hsa05210.value <= threshold=1.2284520268440247
node_945: feature_name=GO:0097651	GO:0097651.value <= threshold=1.4858229756355286
node_946: feature_name=GO:0071313	GO:0071313.value <= threshold=0.709622859954834
node_947: feature_name=hsa04152	hsa04152.value > threshold=0.3257712870836258
node_969: feature_name=GO:0060612	GO:0060612.value <= threshold=0.5819870829582214
Class: COADREAD
Rules_47	passed counts:11
node_0: feature_name=GO:0019002	GO:0019002.value <= threshold=0.44260887801647186
node_1: feature_name=GO:0031052	GO:0031052.value <= threshold=1.5308658480644226
node_2: feature_name=GO:0044028	GO:0044028.value <= threshold=2.612712264060974
node_3: feature_name=GO:0061428	GO:0061428.value <= threshold=1.6541950702667236
node_4: feature_name=hsa05210	hsa05210.value <= threshold=0.010015622712671757
node_5: feature_name=GO:0051049	GO:0051049.value > threshold=0.001117223291657865
node_85: feature_name=GO:0031657	GO:0031657.value <= threshold=1.516840398311615
node_86: feature_name=GO:0044030	GO:0044030.value <= threshold=1.7840761542320251
node_87: feature_name=GO:0004872	GO:0004872.value > threshold=0.6798067986965179
node_575: feature_name=GO:0050907	GO:0050907.value > threshold=1.8050302863121033
node_775: feature_name=GO:0046854	GO:0046854.value <= threshold=0.33894410729408264
node_776: feature_name=GO:0050803	GO:0050803.value > threshold=0.0712827667593956
node_784: feature_name=GO:0046621	GO:0046621.value <= threshold=0.3264657258987427
node_785: feature_name=GO:0000904	GO:0000904.value > threshold=0.06332086864858866
Class: LUAD
Rules_48	passed counts:11
node_0: feature_name=GO:0019002	GO:0019002.value <= threshold=0.44260887801647186
node_1: feature_name=GO:0031052	GO:0031052.value <= threshold=1.5308658480644226
node_2: feature_name=GO:0044028	GO:0044028.value <= threshold=2.612712264060974
node_3: feature_name=GO:0061428	GO:0061428.value <= threshold=1.6541950702667236
node_4: feature_name=hsa05210	hsa05210.value <= threshold=0.010015622712671757
node_5: feature_name=GO:0051049	GO:0051049.value > threshold=0.001117223291657865
node_85: feature_name=GO:0031657	GO:0031657.value <= threshold=1.516840398311615
node_86: feature_name=GO:0044030	GO:0044030.value <= threshold=1.7840761542320251
node_87: feature_name=GO:0004872	GO:0004872.value <= threshold=0.6798067986965179
node_88: feature_name=GO:0019899	GO:0019899.value > threshold=0.005233323434367776
node_122: feature_name=GO:0042391	GO:0042391.value <= threshold=0.38280558586120605
node_123: feature_name=GO:0005886	GO:0005886.value > threshold=0.42232681810855865
node_263: feature_name=GO:0043167	GO:0043167.value <= threshold=1.177414894104004
node_264: feature_name=GO:0010661	GO:0010661.value <= threshold=0.6713261604309082
node_265: feature_name=GO:0005575	GO:0005575.value <= threshold=0.4431428909301758
node_266: feature_name=GO:0032879	GO:0032879.value > threshold=0.11541628837585449
node_284: feature_name=hsa04620	hsa04620.value <= threshold=0.4165951758623123
node_285: feature_name=w239	w239.value > threshold=0.08639749884605408
node_293: feature_name=w182	w182.value <= threshold=0.27764999866485596
node_294: feature_name=GO:0030182	GO:0030182.value <= threshold=0.6487957835197449
node_295: feature_name=hsa04150	hsa04150.value <= threshold=0.8655423820018768
Class: KIRC
Rules_49	passed counts:10
node_0: feature_name=GO:0019002	GO:0019002.value <= threshold=0.44260887801647186
node_1: feature_name=GO:0031052	GO:0031052.value > threshold=1.5308658480644226
node_1395: feature_name=hsa05214	hsa05214.value > threshold=1.511171042919159
node_1751: feature_name=GO:0043560	GO:0043560.value > threshold=1.633065402507782
node_1851: feature_name=w182	w182.value <= threshold=0.2966039925813675
node_1852: feature_name=GO:1902108	GO:1902108.value > threshold=1.0053118169307709
Class: UCEC
Rules_50	passed counts:10
node_0: feature_name=GO:0019002	GO:0019002.value <= threshold=0.44260887801647186
node_1: feature_name=GO:0031052	GO:0031052.value > threshold=1.5308658480644226
node_1395: feature_name=hsa05214	hsa05214.value > threshold=1.511171042919159
node_1751: feature_name=GO:0043560	GO:0043560.value <= threshold=1.633065402507782
node_1752: feature_name=GO:0031657	GO:0031657.value <= threshold=1.520110011100769
node_1753: feature_name=GO:0010225	GO:0010225.value > threshold=3.0487908124923706
node_1821: feature_name=GO:0022836	GO:0022836.value <= threshold=0.6064285635948181
Class: OV
Rules_51	passed counts:10
node_0: feature_name=GO:0019002	GO:0019002.value <= threshold=0.44260887801647186
node_1: feature_name=GO:0031052	GO:0031052.value > threshold=1.5308658480644226
node_1395: feature_name=hsa05214	hsa05214.value <= threshold=1.511171042919159
node_1396: feature_name=GO:0042772	GO:0042772.value <= threshold=1.405928909778595
node_1397: feature_name=GO:0010661	GO:0010661.value > threshold=0.293410062789917
node_1427: feature_name=GO:1900119	GO:1900119.value > threshold=1.3893239498138428
node_1465: feature_name=GO:0042391	GO:0042391.value <= threshold=1.1939783096313477
node_1466: feature_name=GO:0007399	GO:0007399.value > threshold=0.13430748134851456
node_1470: feature_name=GO:0098655	GO:0098655.value > threshold=0.08384867757558823
node_1486: feature_name=GO:1902578	GO:1902578.value > threshold=0.21491818130016327
node_1494: feature_name=GO:0030018	GO:0030018.value > threshold=0.4843136668205261
node_1512: feature_name=w189	w189.value <= threshold=0.03830749914050102
node_1513: feature_name=GO:0050808	GO:0050808.value > threshold=0.12644951045513153
Class: COADREAD
Rules_52	passed counts:10
node_0: feature_name=GO:0019002	GO:0019002.value <= threshold=0.44260887801647186
node_1: feature_name=GO:0031052	GO:0031052.value > threshold=1.5308658480644226
node_1395: feature_name=hsa05214	hsa05214.value <= threshold=1.511171042919159
node_1396: feature_name=GO:0042772	GO:0042772.value <= threshold=1.405928909778595
node_1397: feature_name=GO:0010661	GO:0010661.value > threshold=0.293410062789917
node_1427: feature_name=GO:1900119	GO:1900119.value > threshold=1.3893239498138428
node_1465: feature_name=GO:0042391	GO:0042391.value <= threshold=1.1939783096313477
node_1466: feature_name=GO:0007399	GO:0007399.value > threshold=0.13430748134851456
node_1470: feature_name=GO:0098655	GO:0098655.value > threshold=0.08384867757558823
node_1486: feature_name=GO:1902578	GO:1902578.value <= threshold=0.21491818130016327
node_1487: feature_name=GO:0009628	GO:0009628.value <= threshold=0.8155331313610077
node_1488: feature_name=GO:0061323	GO:0061323.value <= threshold=0.6491987109184265
Class: BRCA
Rules_53	passed counts:10
node_0: feature_name=GO:0019002	GO:0019002.value <= threshold=0.44260887801647186
node_1: feature_name=GO:0031052	GO:0031052.value <= threshold=1.5308658480644226
node_2: feature_name=GO:0044028	GO:0044028.value <= threshold=2.612712264060974
node_3: feature_name=GO:0061428	GO:0061428.value <= threshold=1.6541950702667236
node_4: feature_name=hsa05210	hsa05210.value > threshold=0.010015622712671757
node_842: feature_name=GO:0051717	GO:0051717.value <= threshold=0.5213537216186523
node_843: feature_name=hsa04740	hsa04740.value <= threshold=0.4976523220539093
node_844: feature_name=GO:0007608	GO:0007608.value > threshold=4.729525570201787e-05
node_940: feature_name=GO:0007275	GO:0007275.value <= threshold=3.126664400100708
node_941: feature_name=GO:0006306	GO:0006306.value <= threshold=0.3354291766881943
node_942: feature_name=GO:1902108	GO:1902108.value > threshold=0.09483636170625687
node_994: feature_name=GO:0035033	GO:0035033.value > threshold=1.4224371314048767
node_1040: feature_name=GO:0006302	GO:0006302.value > threshold=0.3897097557783127
node_1048: feature_name=GO:0008630	GO:0008630.value <= threshold=0.4150038957595825
node_1049: feature_name=GO:2000026	GO:2000026.value <= threshold=1.4547579884529114
Class: HNSC
Rules_54	passed counts:10
node_0: feature_name=GO:0019002	GO:0019002.value <= threshold=0.44260887801647186
node_1: feature_name=GO:0031052	GO:0031052.value <= threshold=1.5308658480644226
node_2: feature_name=GO:0044028	GO:0044028.value <= threshold=2.612712264060974
node_3: feature_name=GO:0061428	GO:0061428.value <= threshold=1.6541950702667236
node_4: feature_name=hsa05210	hsa05210.value > threshold=0.010015622712671757
node_842: feature_name=GO:0051717	GO:0051717.value <= threshold=0.5213537216186523
node_843: feature_name=hsa04740	hsa04740.value <= threshold=0.4976523220539093
node_844: feature_name=GO:0007608	GO:0007608.value <= threshold=4.729525570201787e-05
node_845: feature_name=GO:0060572	GO:0060572.value <= threshold=0.08363711833953857
node_846: feature_name=GO:0090199	GO:0090199.value > threshold=0.9668825268745422
node_922: feature_name=GO:0022834	GO:0022834.value <= threshold=1.5054198503494263
Class: BRCA
Rules_55	passed counts:10
node_0: feature_name=GO:0019002	GO:0019002.value <= threshold=0.44260887801647186
node_1: feature_name=GO:0031052	GO:0031052.value <= threshold=1.5308658480644226
node_2: feature_name=GO:0044028	GO:0044028.value <= threshold=2.612712264060974
node_3: feature_name=GO:0061428	GO:0061428.value <= threshold=1.6541950702667236
node_4: feature_name=hsa05210	hsa05210.value <= threshold=0.010015622712671757
node_5: feature_name=GO:0051049	GO:0051049.value > threshold=0.001117223291657865
node_85: feature_name=GO:0031657	GO:0031657.value <= threshold=1.516840398311615
node_86: feature_name=GO:0044030	GO:0044030.value <= threshold=1.7840761542320251
node_87: feature_name=GO:0004872	GO:0004872.value > threshold=0.6798067986965179
node_575: feature_name=GO:0050907	GO:0050907.value <= threshold=1.8050302863121033
node_576: feature_name=n419	n419.value > threshold=-0.044234998524188995
node_598: feature_name=GO:0022838	GO:0022838.value > threshold=0.062499335035681725
node_634: feature_name=GO:0022008	GO:0022008.value <= threshold=2.9196107387542725
node_635: feature_name=GO:0043167	GO:0043167.value <= threshold=1.1558712124824524
node_636: feature_name=GO:0007186	GO:0007186.value <= threshold=0.8086933195590973
node_637: feature_name=w45	w45.value > threshold=0.3224470019340515
node_653: feature_name=w34	w34.value <= threshold=-0.03440850041806698
node_654: feature_name=GO:0098662	GO:0098662.value <= threshold=1.4258143305778503
node_655: feature_name=GO:0001508	GO:0001508.value <= threshold=1.402309536933899
node_656: feature_name=GO:2000026	GO:2000026.value > threshold=0.4782547503709793
node_678: feature_name=GO:0005887	GO:0005887.value > threshold=0.7007404863834381
node_684: feature_name=GO:0097060	GO:0097060.value <= threshold=1.4607828259468079
node_685: feature_name=GO:0007416	GO:0007416.value <= threshold=1.5705451965332031
Class: OV
Rules_56	passed counts:10
node_0: feature_name=GO:0019002	GO:0019002.value <= threshold=0.44260887801647186
node_1: feature_name=GO:0031052	GO:0031052.value <= threshold=1.5308658480644226
node_2: feature_name=GO:0044028	GO:0044028.value <= threshold=2.612712264060974
node_3: feature_name=GO:0061428	GO:0061428.value <= threshold=1.6541950702667236
node_4: feature_name=hsa05210	hsa05210.value <= threshold=0.010015622712671757
node_5: feature_name=GO:0051049	GO:0051049.value > threshold=0.001117223291657865
node_85: feature_name=GO:0031657	GO:0031657.value <= threshold=1.516840398311615
node_86: feature_name=GO:0044030	GO:0044030.value <= threshold=1.7840761542320251
node_87: feature_name=GO:0004872	GO:0004872.value > threshold=0.6798067986965179
node_575: feature_name=GO:0050907	GO:0050907.value <= threshold=1.8050302863121033
node_576: feature_name=n419	n419.value > threshold=-0.044234998524188995
node_598: feature_name=GO:0022838	GO:0022838.value <= threshold=0.062499335035681725
node_599: feature_name=GO:0005942	GO:0005942.value <= threshold=1.260486900806427
node_600: feature_name=GO:0040007	GO:0040007.value <= threshold=0.4254797399044037
node_601: feature_name=GO:0009628	GO:0009628.value > threshold=0.023499231785535812
node_605: feature_name=GO:0007186	GO:0007186.value <= threshold=0.3567918539047241
node_606: feature_name=GO:0071514	GO:0071514.value <= threshold=0.44867056608200073
node_607: feature_name=GO:0022610	GO:0022610.value > threshold=0.14840877801179886
Class: OV
Rules_57	passed counts:10
node_0: feature_name=GO:0019002	GO:0019002.value <= threshold=0.44260887801647186
node_1: feature_name=GO:0031052	GO:0031052.value <= threshold=1.5308658480644226
node_2: feature_name=GO:0044028	GO:0044028.value <= threshold=2.612712264060974
node_3: feature_name=GO:0061428	GO:0061428.value <= threshold=1.6541950702667236
node_4: feature_name=hsa05210	hsa05210.value <= threshold=0.010015622712671757
node_5: feature_name=GO:0051049	GO:0051049.value > threshold=0.001117223291657865
node_85: feature_name=GO:0031657	GO:0031657.value <= threshold=1.516840398311615
node_86: feature_name=GO:0044030	GO:0044030.value <= threshold=1.7840761542320251
node_87: feature_name=GO:0004872	GO:0004872.value <= threshold=0.6798067986965179
node_88: feature_name=GO:0019899	GO:0019899.value > threshold=0.005233323434367776
node_122: feature_name=GO:0042391	GO:0042391.value > threshold=0.38280558586120605
node_394: feature_name=GO:0048589	GO:0048589.value > threshold=0.0312800258398056
node_434: feature_name=GO:0048731	GO:0048731.value > threshold=0.19495543837547302
node_452: feature_name=hsa04530	hsa04530.value > threshold=0.5746428370475769
node_548: feature_name=w131	w131.value > threshold=0.1733195036649704
node_568: feature_name=GO:0001508	GO:0001508.value > threshold=0.29491911828517914
Class: HNSC
Rules_58	passed counts:10
node_0: feature_name=GO:0019002	GO:0019002.value <= threshold=0.44260887801647186
node_1: feature_name=GO:0031052	GO:0031052.value <= threshold=1.5308658480644226
node_2: feature_name=GO:0044028	GO:0044028.value <= threshold=2.612712264060974
node_3: feature_name=GO:0061428	GO:0061428.value <= threshold=1.6541950702667236
node_4: feature_name=hsa05210	hsa05210.value <= threshold=0.010015622712671757
node_5: feature_name=GO:0051049	GO:0051049.value > threshold=0.001117223291657865
node_85: feature_name=GO:0031657	GO:0031657.value <= threshold=1.516840398311615
node_86: feature_name=GO:0044030	GO:0044030.value <= threshold=1.7840761542320251
node_87: feature_name=GO:0004872	GO:0004872.value <= threshold=0.6798067986965179
node_88: feature_name=GO:0019899	GO:0019899.value > threshold=0.005233323434367776
node_122: feature_name=GO:0042391	GO:0042391.value > threshold=0.38280558586120605
node_394: feature_name=GO:0048589	GO:0048589.value <= threshold=0.0312800258398056
node_395: feature_name=GO:0051049	GO:0051049.value > threshold=0.2129829227924347
node_405: feature_name=GO:0032502	GO:0032502.value > threshold=0.12256435304880142
node_407: feature_name=GO:2000026	GO:2000026.value <= threshold=0.8363295793533325
node_408: feature_name=GO:0032989	GO:0032989.value > threshold=0.021905455738306046
node_410: feature_name=GO:0097060	GO:0097060.value <= threshold=0.6892344355583191
node_411: feature_name=GO:0022610	GO:0022610.value <= threshold=0.64247065782547
node_412: feature_name=w145	w145.value > threshold=-0.1825380027294159
Class: BRCA
Rules_59	passed counts:10
node_0: feature_name=GO:0019002	GO:0019002.value <= threshold=0.44260887801647186
node_1: feature_name=GO:0031052	GO:0031052.value <= threshold=1.5308658480644226
node_2: feature_name=GO:0044028	GO:0044028.value <= threshold=2.612712264060974
node_3: feature_name=GO:0061428	GO:0061428.value <= threshold=1.6541950702667236
node_4: feature_name=hsa05210	hsa05210.value <= threshold=0.010015622712671757
node_5: feature_name=GO:0051049	GO:0051049.value > threshold=0.001117223291657865
node_85: feature_name=GO:0031657	GO:0031657.value <= threshold=1.516840398311615
node_86: feature_name=GO:0044030	GO:0044030.value <= threshold=1.7840761542320251
node_87: feature_name=GO:0004872	GO:0004872.value <= threshold=0.6798067986965179
node_88: feature_name=GO:0019899	GO:0019899.value > threshold=0.005233323434367776
node_122: feature_name=GO:0042391	GO:0042391.value <= threshold=0.38280558586120605
node_123: feature_name=GO:0005886	GO:0005886.value <= threshold=0.42232681810855865
node_124: feature_name=hsa04726	hsa04726.value <= threshold=0.9402436017990112
node_125: feature_name=GO:0048869	GO:0048869.value <= threshold=1.0812776684761047
node_126: feature_name=w45	w45.value > threshold=0.3547459989786148
node_204: feature_name=GO:0044456	GO:0044456.value <= threshold=0.23617876321077347
node_205: feature_name=GO:0023052	GO:0023052.value <= threshold=0.15498481690883636
Class: KIRC
Rules_60	passed counts:10
node_0: feature_name=GO:0019002	GO:0019002.value <= threshold=0.44260887801647186
node_1: feature_name=GO:0031052	GO:0031052.value <= threshold=1.5308658480644226
node_2: feature_name=GO:0044028	GO:0044028.value <= threshold=2.612712264060974
node_3: feature_name=GO:0061428	GO:0061428.value <= threshold=1.6541950702667236
node_4: feature_name=hsa05210	hsa05210.value <= threshold=0.010015622712671757
node_5: feature_name=GO:0051049	GO:0051049.value <= threshold=0.001117223291657865
node_6: feature_name=hsa05221	hsa05221.value <= threshold=1.3642892241477966
node_7: feature_name=GO:0032990	GO:0032990.value > threshold=0.04031727463006973
node_41: feature_name=GO:0032990	GO:0032990.value > threshold=0.7532182037830353
node_75: feature_name=GO:0044459	GO:0044459.value <= threshold=0.5840856432914734
node_76: feature_name=w182	w182.value <= threshold=0.3882494866847992
Class: LAML
Rules_61	passed counts:10
node_0: feature_name=GO:0019002	GO:0019002.value <= threshold=0.44260887801647186
node_1: feature_name=GO:0031052	GO:0031052.value <= threshold=1.5308658480644226
node_2: feature_name=GO:0044028	GO:0044028.value <= threshold=2.612712264060974
node_3: feature_name=GO:0061428	GO:0061428.value <= threshold=1.6541950702667236
node_4: feature_name=hsa05210	hsa05210.value <= threshold=0.010015622712671757
node_5: feature_name=GO:0051049	GO:0051049.value <= threshold=0.001117223291657865
node_6: feature_name=hsa05221	hsa05221.value <= threshold=1.3642892241477966
node_7: feature_name=GO:0032990	GO:0032990.value > threshold=0.04031727463006973
node_41: feature_name=GO:0032990	GO:0032990.value <= threshold=0.7532182037830353
node_42: feature_name=GO:0018193	GO:0018193.value > threshold=0.3025086969137192
node_62: feature_name=GO:0098590	GO:0098590.value > threshold=0.0544092133641243
node_68: feature_name=GO:0050803	GO:0050803.value <= threshold=0.5311486124992371
node_69: feature_name=GO:0048468	GO:0048468.value <= threshold=1.3370396494865417
Class: KIRC
Rules_62	passed counts:9
node_0: feature_name=GO:0019002	GO:0019002.value > threshold=0.44260887801647186
node_1878: feature_name=GO:0019002	GO:0019002.value > threshold=1.837906301021576
node_1916: feature_name=GO:0005943	GO:0005943.value <= threshold=2.334170937538147
node_1917: feature_name=GO:0019002	GO:0019002.value > threshold=2.587051510810852
node_1967: feature_name=GO:0098742	GO:0098742.value <= threshold=0.35720568895339966
node_1968: feature_name=GO:0065009	GO:0065009.value <= threshold=0.6743719279766083
Class: LAML
Rules_63	passed counts:9
node_0: feature_name=GO:0019002	GO:0019002.value <= threshold=0.44260887801647186
node_1: feature_name=GO:0031052	GO:0031052.value > threshold=1.5308658480644226
node_1395: feature_name=hsa05214	hsa05214.value <= threshold=1.511171042919159
node_1396: feature_name=GO:0042772	GO:0042772.value > threshold=1.405928909778595
node_1554: feature_name=GO:0001508	GO:0001508.value <= threshold=1.8742843270301819
node_1555: feature_name=GO:0010484	GO:0010484.value <= threshold=1.9488680958747864
node_1556: feature_name=GO:2000378	GO:2000378.value > threshold=0.9872501492500305
node_1574: feature_name=GO:0007399	GO:0007399.value > threshold=0.16499362885951996
node_1598: feature_name=GO:0046872	GO:0046872.value > threshold=0.3268098682165146
node_1612: feature_name=GO:0010718	GO:0010718.value <= threshold=0.28714585304260254
node_1613: feature_name=w34	w34.value > threshold=-0.05662799999117851
node_1651: feature_name=GO:0018193	GO:0018193.value > threshold=0.2722988724708557
node_1657: feature_name=GO:0006302	GO:0006302.value <= threshold=1.8755057454109192
node_1658: feature_name=GO:0009611	GO:0009611.value > threshold=0.15191232413053513
node_1662: feature_name=GO:0019899	GO:0019899.value > threshold=0.9850790798664093
node_1702: feature_name=GO:2000573	GO:2000573.value <= threshold=0.6799144744873047
Class: OV
Rules_64	passed counts:9
node_0: feature_name=GO:0019002	GO:0019002.value <= threshold=0.44260887801647186
node_1: feature_name=GO:0031052	GO:0031052.value > threshold=1.5308658480644226
node_1395: feature_name=hsa05214	hsa05214.value <= threshold=1.511171042919159
node_1396: feature_name=GO:0042772	GO:0042772.value > threshold=1.405928909778595
node_1554: feature_name=GO:0001508	GO:0001508.value <= threshold=1.8742843270301819
node_1555: feature_name=GO:0010484	GO:0010484.value <= threshold=1.9488680958747864
node_1556: feature_name=GO:2000378	GO:2000378.value > threshold=0.9872501492500305
node_1574: feature_name=GO:0007399	GO:0007399.value > threshold=0.16499362885951996
node_1598: feature_name=GO:0046872	GO:0046872.value > threshold=0.3268098682165146
node_1612: feature_name=GO:0010718	GO:0010718.value <= threshold=0.28714585304260254
node_1613: feature_name=w34	w34.value > threshold=-0.05662799999117851
node_1651: feature_name=GO:0018193	GO:0018193.value > threshold=0.2722988724708557
node_1657: feature_name=GO:0006302	GO:0006302.value <= threshold=1.8755057454109192
node_1658: feature_name=GO:0009611	GO:0009611.value > threshold=0.15191232413053513
node_1662: feature_name=GO:0019899	GO:0019899.value <= threshold=0.9850790798664093
node_1663: feature_name=GO:0044707	GO:0044707.value <= threshold=1.8703078031539917
node_1664: feature_name=GO:0006302	GO:0006302.value > threshold=0.6015291810035706
node_1668: feature_name=GO:0060089	GO:0060089.value > threshold=0.4789392203092575
node_1694: feature_name=GO:0044728	GO:0044728.value <= threshold=0.7857014238834381
node_1695: feature_name=GO:0044707	GO:0044707.value > threshold=0.22104264050722122
Class: OV
Rules_65	passed counts:9
node_0: feature_name=GO:0019002	GO:0019002.value <= threshold=0.44260887801647186
node_1: feature_name=GO:0031052	GO:0031052.value > threshold=1.5308658480644226
node_1395: feature_name=hsa05214	hsa05214.value <= threshold=1.511171042919159
node_1396: feature_name=GO:0042772	GO:0042772.value <= threshold=1.405928909778595
node_1397: feature_name=GO:0010661	GO:0010661.value > threshold=0.293410062789917
node_1427: feature_name=GO:1900119	GO:1900119.value <= threshold=1.3893239498138428
node_1428: feature_name=GO:0048856	GO:0048856.value > threshold=0.25651074945926666
node_1434: feature_name=GO:0033028	GO:0033028.value <= threshold=0.44549858570098877
node_1435: feature_name=GO:0005261	GO:0005261.value <= threshold=0.2745572403073311
node_1436: feature_name=GO:0048468	GO:0048468.value > threshold=0.2632344290614128
Class: HNSC
Rules_66	passed counts:9
node_0: feature_name=GO:0019002	GO:0019002.value <= threshold=0.44260887801647186
node_1: feature_name=GO:0031052	GO:0031052.value <= threshold=1.5308658480644226
node_2: feature_name=GO:0044028	GO:0044028.value <= threshold=2.612712264060974
node_3: feature_name=GO:0061428	GO:0061428.value <= threshold=1.6541950702667236
node_4: feature_name=hsa05210	hsa05210.value > threshold=0.010015622712671757
node_842: feature_name=GO:0051717	GO:0051717.value <= threshold=0.5213537216186523
node_843: feature_name=hsa04740	hsa04740.value <= threshold=0.4976523220539093
node_844: feature_name=GO:0007608	GO:0007608.value > threshold=4.729525570201787e-05
node_940: feature_name=GO:0007275	GO:0007275.value <= threshold=3.126664400100708
node_941: feature_name=GO:0006306	GO:0006306.value <= threshold=0.3354291766881943
node_942: feature_name=GO:1902108	GO:1902108.value <= threshold=0.09483636170625687
node_943: feature_name=hsa04150	hsa04150.value <= threshold=0.8822639584541321
node_944: feature_name=hsa05210	hsa05210.value > threshold=1.2284520268440247
Class: COADREAD
Rules_67	passed counts:9
node_0: feature_name=GO:0019002	GO:0019002.value <= threshold=0.44260887801647186
node_1: feature_name=GO:0031052	GO:0031052.value <= threshold=1.5308658480644226
node_2: feature_name=GO:0044028	GO:0044028.value <= threshold=2.612712264060974
node_3: feature_name=GO:0061428	GO:0061428.value <= threshold=1.6541950702667236
node_4: feature_name=hsa05210	hsa05210.value > threshold=0.010015622712671757
node_842: feature_name=GO:0051717	GO:0051717.value <= threshold=0.5213537216186523
node_843: feature_name=hsa04740	hsa04740.value <= threshold=0.4976523220539093
node_844: feature_name=GO:0007608	GO:0007608.value <= threshold=4.729525570201787e-05
node_845: feature_name=GO:0060572	GO:0060572.value > threshold=0.08363711833953857
node_927: feature_name=GO:0098662	GO:0098662.value > threshold=0.242763489484787
node_937: feature_name=hsa04620	hsa04620.value <= threshold=0.23237821739166975
Class: UCEC
Rules_68	passed counts:9
node_0: feature_name=GO:0019002	GO:0019002.value <= threshold=0.44260887801647186
node_1: feature_name=GO:0031052	GO:0031052.value <= threshold=1.5308658480644226
node_2: feature_name=GO:0044028	GO:0044028.value <= threshold=2.612712264060974
node_3: feature_name=GO:0061428	GO:0061428.value <= threshold=1.6541950702667236
node_4: feature_name=hsa05210	hsa05210.value <= threshold=0.010015622712671757
node_5: feature_name=GO:0051049	GO:0051049.value > threshold=0.001117223291657865
node_85: feature_name=GO:0031657	GO:0031657.value <= threshold=1.516840398311615
node_86: feature_name=GO:0044030	GO:0044030.value <= threshold=1.7840761542320251
node_87: feature_name=GO:0004872	GO:0004872.value > threshold=0.6798067986965179
node_575: feature_name=GO:0050907	GO:0050907.value <= threshold=1.8050302863121033
node_576: feature_name=n419	n419.value > threshold=-0.044234998524188995
node_598: feature_name=GO:0022838	GO:0022838.value > threshold=0.062499335035681725
node_634: feature_name=GO:0022008	GO:0022008.value <= threshold=2.9196107387542725
node_635: feature_name=GO:0043167	GO:0043167.value > threshold=1.1558712124824524
node_729: feature_name=GO:0007409	GO:0007409.value <= threshold=2.1150132417678833
node_730: feature_name=GO:0051703	GO:0051703.value > threshold=0.5762815773487091
node_764: feature_name=GO:0098609	GO:0098609.value > threshold=0.37263745069503784
node_768: feature_name=GO:0060089	GO:0060089.value <= threshold=2.552048087120056
Class: HNSC
Rules_69	passed counts:9
node_0: feature_name=GO:0019002	GO:0019002.value <= threshold=0.44260887801647186
node_1: feature_name=GO:0031052	GO:0031052.value <= threshold=1.5308658480644226
node_2: feature_name=GO:0044028	GO:0044028.value <= threshold=2.612712264060974
node_3: feature_name=GO:0061428	GO:0061428.value <= threshold=1.6541950702667236
node_4: feature_name=hsa05210	hsa05210.value <= threshold=0.010015622712671757
node_5: feature_name=GO:0051049	GO:0051049.value > threshold=0.001117223291657865
node_85: feature_name=GO:0031657	GO:0031657.value <= threshold=1.516840398311615
node_86: feature_name=GO:0044030	GO:0044030.value <= threshold=1.7840761542320251
node_87: feature_name=GO:0004872	GO:0004872.value <= threshold=0.6798067986965179
node_88: feature_name=GO:0019899	GO:0019899.value > threshold=0.005233323434367776
node_122: feature_name=GO:0042391	GO:0042391.value > threshold=0.38280558586120605
node_394: feature_name=GO:0048589	GO:0048589.value <= threshold=0.0312800258398056
node_395: feature_name=GO:0051049	GO:0051049.value > threshold=0.2129829227924347
node_405: feature_name=GO:0032502	GO:0032502.value <= threshold=0.12256435304880142
Class: KIRC
Rules_70	passed counts:9
node_0: feature_name=GO:0019002	GO:0019002.value <= threshold=0.44260887801647186
node_1: feature_name=GO:0031052	GO:0031052.value <= threshold=1.5308658480644226
node_2: feature_name=GO:0044028	GO:0044028.value <= threshold=2.612712264060974
node_3: feature_name=GO:0061428	GO:0061428.value <= threshold=1.6541950702667236
node_4: feature_name=hsa05210	hsa05210.value <= threshold=0.010015622712671757
node_5: feature_name=GO:0051049	GO:0051049.value > threshold=0.001117223291657865
node_85: feature_name=GO:0031657	GO:0031657.value <= threshold=1.516840398311615
node_86: feature_name=GO:0044030	GO:0044030.value <= threshold=1.7840761542320251
node_87: feature_name=GO:0004872	GO:0004872.value <= threshold=0.6798067986965179
node_88: feature_name=GO:0019899	GO:0019899.value > threshold=0.005233323434367776
node_122: feature_name=GO:0042391	GO:0042391.value <= threshold=0.38280558586120605
node_123: feature_name=GO:0005886	GO:0005886.value > threshold=0.42232681810855865
node_263: feature_name=GO:0043167	GO:0043167.value > threshold=1.177414894104004
node_345: feature_name=hsa04919	hsa04919.value > threshold=0.21158312261104584
node_377: feature_name=w45	w45.value > threshold=0.32265399396419525
node_389: feature_name=GO:0003008	GO:0003008.value <= threshold=0.8657369911670685
Class: BLCA
Rules_71	passed counts:9
node_0: feature_name=GO:0019002	GO:0019002.value <= threshold=0.44260887801647186
node_1: feature_name=GO:0031052	GO:0031052.value <= threshold=1.5308658480644226
node_2: feature_name=GO:0044028	GO:0044028.value <= threshold=2.612712264060974
node_3: feature_name=GO:0061428	GO:0061428.value <= threshold=1.6541950702667236
node_4: feature_name=hsa05210	hsa05210.value <= threshold=0.010015622712671757
node_5: feature_name=GO:0051049	GO:0051049.value > threshold=0.001117223291657865
node_85: feature_name=GO:0031657	GO:0031657.value <= threshold=1.516840398311615
node_86: feature_name=GO:0044030	GO:0044030.value <= threshold=1.7840761542320251
node_87: feature_name=GO:0004872	GO:0004872.value <= threshold=0.6798067986965179
node_88: feature_name=GO:0019899	GO:0019899.value > threshold=0.005233323434367776
node_122: feature_name=GO:0042391	GO:0042391.value <= threshold=0.38280558586120605
node_123: feature_name=GO:0005886	GO:0005886.value <= threshold=0.42232681810855865
node_124: feature_name=hsa04726	hsa04726.value <= threshold=0.9402436017990112
node_125: feature_name=GO:0048869	GO:0048869.value <= threshold=1.0812776684761047
node_126: feature_name=w45	w45.value > threshold=0.3547459989786148
node_204: feature_name=GO:0044456	GO:0044456.value > threshold=0.23617876321077347
node_220: feature_name=GO:0005886	GO:0005886.value <= threshold=0.265213206410408
node_221: feature_name=GO:0030154	GO:0030154.value > threshold=0.1258123628795147
Class: BRCA
Rules_72	passed counts:8
node_0: feature_name=GO:0019002	GO:0019002.value <= threshold=0.44260887801647186
node_1: feature_name=GO:0031052	GO:0031052.value > threshold=1.5308658480644226
node_1395: feature_name=hsa05214	hsa05214.value > threshold=1.511171042919159
node_1751: feature_name=GO:0043560	GO:0043560.value <= threshold=1.633065402507782
node_1752: feature_name=GO:0031657	GO:0031657.value <= threshold=1.520110011100769
node_1753: feature_name=GO:0010225	GO:0010225.value <= threshold=3.0487908124923706
node_1754: feature_name=GO:0003266	GO:0003266.value <= threshold=1.4739093780517578
node_1755: feature_name=GO:0050807	GO:0050807.value <= threshold=0.2123531550168991
node_1756: feature_name=GO:0006302	GO:0006302.value <= threshold=1.3659553527832031
node_1757: feature_name=GO:0032879	GO:0032879.value <= threshold=1.462652862071991
node_1758: feature_name=GO:0007600	GO:0007600.value > threshold=0.09238758310675621
node_1768: feature_name=GO:0034349	GO:0034349.value <= threshold=2.0435250401496887
node_1769: feature_name=GO:0007167	GO:0007167.value > threshold=0.3548578917980194
node_1775: feature_name=w45	w45.value <= threshold=0.3458010107278824
node_1776: feature_name=GO:0031175	GO:0031175.value > threshold=0.263206347823143
Class: COADREAD
Rules_73	passed counts:8
node_0: feature_name=GO:0019002	GO:0019002.value <= threshold=0.44260887801647186
node_1: feature_name=GO:0031052	GO:0031052.value > threshold=1.5308658480644226
node_1395: feature_name=hsa05214	hsa05214.value <= threshold=1.511171042919159
node_1396: feature_name=GO:0042772	GO:0042772.value <= threshold=1.405928909778595
node_1397: feature_name=GO:0010661	GO:0010661.value > threshold=0.293410062789917
node_1427: feature_name=GO:1900119	GO:1900119.value > threshold=1.3893239498138428
node_1465: feature_name=GO:0042391	GO:0042391.value <= threshold=1.1939783096313477
node_1466: feature_name=GO:0007399	GO:0007399.value > threshold=0.13430748134851456
node_1470: feature_name=GO:0098655	GO:0098655.value > threshold=0.08384867757558823
node_1486: feature_name=GO:1902578	GO:1902578.value > threshold=0.21491818130016327
node_1494: feature_name=GO:0030018	GO:0030018.value > threshold=0.4843136668205261
node_1512: feature_name=w189	w189.value > threshold=0.03830749914050102
node_1520: feature_name=w34	w34.value > threshold=-0.05630499869585037
node_1532: feature_name=GO:0032989	GO:0032989.value > threshold=0.27448563277721405
node_1534: feature_name=GO:1902578	GO:1902578.value <= threshold=1.0746440887451172
node_1535: feature_name=GO:0050877	GO:0050877.value <= threshold=1.0256615281105042
Class: OV
Rules_74	passed counts:8
node_0: feature_name=GO:0019002	GO:0019002.value <= threshold=0.44260887801647186
node_1: feature_name=GO:0031052	GO:0031052.value <= threshold=1.5308658480644226
node_2: feature_name=GO:0044028	GO:0044028.value > threshold=2.612712264060974
node_1368: feature_name=GO:0035112	GO:0035112.value <= threshold=0.8113309741020203
node_1369: feature_name=hsa04914	hsa04914.value <= threshold=0.8201488554477692
node_1370: feature_name=GO:0023052	GO:0023052.value <= threshold=0.4763796478509903
node_1371: feature_name=GO:0007420	GO:0007420.value <= threshold=0.8483041226863861
Class: BRCA
Rules_75	passed counts:8
node_0: feature_name=GO:0019002	GO:0019002.value <= threshold=0.44260887801647186
node_1: feature_name=GO:0031052	GO:0031052.value <= threshold=1.5308658480644226
node_2: feature_name=GO:0044028	GO:0044028.value <= threshold=2.612712264060974
node_3: feature_name=GO:0061428	GO:0061428.value <= threshold=1.6541950702667236
node_4: feature_name=hsa05210	hsa05210.value <= threshold=0.010015622712671757
node_5: feature_name=GO:0051049	GO:0051049.value > threshold=0.001117223291657865
node_85: feature_name=GO:0031657	GO:0031657.value <= threshold=1.516840398311615
node_86: feature_name=GO:0044030	GO:0044030.value <= threshold=1.7840761542320251
node_87: feature_name=GO:0004872	GO:0004872.value <= threshold=0.6798067986965179
node_88: feature_name=GO:0019899	GO:0019899.value > threshold=0.005233323434367776
node_122: feature_name=GO:0042391	GO:0042391.value > threshold=0.38280558586120605
node_394: feature_name=GO:0048589	GO:0048589.value > threshold=0.0312800258398056
node_434: feature_name=GO:0048731	GO:0048731.value > threshold=0.19495543837547302
node_452: feature_name=hsa04530	hsa04530.value <= threshold=0.5746428370475769
node_453: feature_name=GO:0045595	GO:0045595.value <= threshold=1.769000768661499
node_454: feature_name=GO:0007156	GO:0007156.value <= threshold=1.0433965921401978
node_455: feature_name=GO:2000026	GO:2000026.value > threshold=0.18738730996847153
node_473: feature_name=GO:0098590	GO:0098590.value > threshold=0.2749122530221939
node_479: feature_name=GO:0043005	GO:0043005.value > threshold=0.48298998177051544
node_491: feature_name=w41	w41.value <= threshold=-0.13265500217676163
node_492: feature_name=GO:0005887	GO:0005887.value <= threshold=1.0353069305419922
Class: BRCA
Rules_76	passed counts:7
node_0: feature_name=GO:0019002	GO:0019002.value > threshold=0.44260887801647186
node_1878: feature_name=GO:0019002	GO:0019002.value > threshold=1.837906301021576
node_1916: feature_name=GO:0005943	GO:0005943.value <= threshold=2.334170937538147
node_1917: feature_name=GO:0019002	GO:0019002.value <= threshold=2.587051510810852
node_1918: feature_name=hsa05215	hsa05215.value > threshold=0.49044638872146606
node_1928: feature_name=GO:0035116	GO:0035116.value > threshold=1.0427671670913696
node_1958: feature_name=GO:0050808	GO:0050808.value > threshold=0.5861817896366119
node_1964: feature_name=GO:0048679	GO:0048679.value <= threshold=1.3671894073486328
Class: COADREAD
Rules_77	passed counts:7
node_0: feature_name=GO:0019002	GO:0019002.value > threshold=0.44260887801647186
node_1878: feature_name=GO:0019002	GO:0019002.value <= threshold=1.837906301021576
node_1879: feature_name=GO:0007608	GO:0007608.value <= threshold=0.7746693193912506
node_1880: feature_name=GO:0007275	GO:0007275.value <= threshold=2.779351592063904
node_1881: feature_name=hsa00562	hsa00562.value <= threshold=0.5940376818180084
node_1882: feature_name=hsa04740	hsa04740.value <= threshold=0.08753589168190956
node_1883: feature_name=GO:0036211	GO:0036211.value > threshold=0.2514350041747093
Class: COADREAD
Rules_78	passed counts:7
node_0: feature_name=GO:0019002	GO:0019002.value <= threshold=0.44260887801647186
node_1: feature_name=GO:0031052	GO:0031052.value > threshold=1.5308658480644226
node_1395: feature_name=hsa05214	hsa05214.value > threshold=1.511171042919159
node_1751: feature_name=GO:0043560	GO:0043560.value <= threshold=1.633065402507782
node_1752: feature_name=GO:0031657	GO:0031657.value <= threshold=1.520110011100769
node_1753: feature_name=GO:0010225	GO:0010225.value <= threshold=3.0487908124923706
node_1754: feature_name=GO:0003266	GO:0003266.value <= threshold=1.4739093780517578
node_1755: feature_name=GO:0050807	GO:0050807.value <= threshold=0.2123531550168991
node_1756: feature_name=GO:0006302	GO:0006302.value > threshold=1.3659553527832031
node_1788: feature_name=GO:0006306	GO:0006306.value <= threshold=0.3848620653152466
Class: OV
Rules_79	passed counts:7
node_0: feature_name=GO:0019002	GO:0019002.value <= threshold=0.44260887801647186
node_1: feature_name=GO:0031052	GO:0031052.value > threshold=1.5308658480644226
node_1395: feature_name=hsa05214	hsa05214.value <= threshold=1.511171042919159
node_1396: feature_name=GO:0042772	GO:0042772.value > threshold=1.405928909778595
node_1554: feature_name=GO:0001508	GO:0001508.value <= threshold=1.8742843270301819
node_1555: feature_name=GO:0010484	GO:0010484.value <= threshold=1.9488680958747864
node_1556: feature_name=GO:2000378	GO:2000378.value > threshold=0.9872501492500305
node_1574: feature_name=GO:0007399	GO:0007399.value <= threshold=0.16499362885951996
node_1575: feature_name=GO:0043292	GO:0043292.value > threshold=0.20629753172397614
node_1589: feature_name=GO:0005509	GO:0005509.value <= threshold=0.851055920124054
node_1590: feature_name=GO:1902688	GO:1902688.value <= threshold=2.858954668045044
Class: BRCA
Rules_80	passed counts:7
node_0: feature_name=GO:0019002	GO:0019002.value <= threshold=0.44260887801647186
node_1: feature_name=GO:0031052	GO:0031052.value > threshold=1.5308658480644226
node_1395: feature_name=hsa05214	hsa05214.value <= threshold=1.511171042919159
node_1396: feature_name=GO:0042772	GO:0042772.value > threshold=1.405928909778595
node_1554: feature_name=GO:0001508	GO:0001508.value <= threshold=1.8742843270301819
node_1555: feature_name=GO:0010484	GO:0010484.value <= threshold=1.9488680958747864
node_1556: feature_name=GO:2000378	GO:2000378.value <= threshold=0.9872501492500305
node_1557: feature_name=w182	w182.value > threshold=0.2662079930305481
node_1559: feature_name=hsa05410	hsa05410.value > threshold=0.9068654477596283
node_1569: feature_name=GO:0044425	GO:0044425.value > threshold=0.5353673696517944
Class: HNSC
Rules_81	passed counts:7
node_0: feature_name=GO:0019002	GO:0019002.value <= threshold=0.44260887801647186
node_1: feature_name=GO:0031052	GO:0031052.value > threshold=1.5308658480644226
node_1395: feature_name=hsa05214	hsa05214.value <= threshold=1.511171042919159
node_1396: feature_name=GO:0042772	GO:0042772.value <= threshold=1.405928909778595
node_1397: feature_name=GO:0010661	GO:0010661.value > threshold=0.293410062789917
node_1427: feature_name=GO:1900119	GO:1900119.value > threshold=1.3893239498138428
node_1465: feature_name=GO:0042391	GO:0042391.value <= threshold=1.1939783096313477
node_1466: feature_name=GO:0007399	GO:0007399.value > threshold=0.13430748134851456
node_1470: feature_name=GO:0098655	GO:0098655.value <= threshold=0.08384867757558823
node_1471: feature_name=GO:0000904	GO:0000904.value <= threshold=1.0061696767807007
node_1472: feature_name=GO:0097458	GO:0097458.value > threshold=0.3555719405412674
node_1482: feature_name=GO:0097252	GO:0097252.value <= threshold=2.076776146888733
Class: HNSC
Rules_82	passed counts:7
node_0: feature_name=GO:0019002	GO:0019002.value <= threshold=0.44260887801647186
node_1: feature_name=GO:0031052	GO:0031052.value > threshold=1.5308658480644226
node_1395: feature_name=hsa05214	hsa05214.value <= threshold=1.511171042919159
node_1396: feature_name=GO:0042772	GO:0042772.value <= threshold=1.405928909778595
node_1397: feature_name=GO:0010661	GO:0010661.value > threshold=0.293410062789917
node_1427: feature_name=GO:1900119	GO:1900119.value <= threshold=1.3893239498138428
node_1428: feature_name=GO:0048856	GO:0048856.value > threshold=0.25651074945926666
node_1434: feature_name=GO:0033028	GO:0033028.value > threshold=0.44549858570098877
Class: HNSC
Rules_83	passed counts:7
node_0: feature_name=GO:0019002	GO:0019002.value <= threshold=0.44260887801647186
node_1: feature_name=GO:0031052	GO:0031052.value <= threshold=1.5308658480644226
node_2: feature_name=GO:0044028	GO:0044028.value <= threshold=2.612712264060974
node_3: feature_name=GO:0061428	GO:0061428.value <= threshold=1.6541950702667236
node_4: feature_name=hsa05210	hsa05210.value > threshold=0.010015622712671757
node_842: feature_name=GO:0051717	GO:0051717.value <= threshold=0.5213537216186523
node_843: feature_name=hsa04740	hsa04740.value > threshold=0.4976523220539093
node_1195: feature_name=hsa05210	hsa05210.value > threshold=0.4788101613521576
node_1237: feature_name=GO:0005218	GO:0005218.value <= threshold=0.7114565074443817
node_1238: feature_name=GO:0007606	GO:0007606.value > threshold=1.7004631757736206
node_1290: feature_name=GO:0044449	GO:0044449.value <= threshold=2.45367968082428
Class: LUAD
Rules_84	passed counts:7
node_0: feature_name=GO:0019002	GO:0019002.value <= threshold=0.44260887801647186
node_1: feature_name=GO:0031052	GO:0031052.value <= threshold=1.5308658480644226
node_2: feature_name=GO:0044028	GO:0044028.value <= threshold=2.612712264060974
node_3: feature_name=GO:0061428	GO:0061428.value <= threshold=1.6541950702667236
node_4: feature_name=hsa05210	hsa05210.value > threshold=0.010015622712671757
node_842: feature_name=GO:0051717	GO:0051717.value <= threshold=0.5213537216186523
node_843: feature_name=hsa04740	hsa04740.value > threshold=0.4976523220539093
node_1195: feature_name=hsa05210	hsa05210.value > threshold=0.4788101613521576
node_1237: feature_name=GO:0005218	GO:0005218.value <= threshold=0.7114565074443817
node_1238: feature_name=GO:0007606	GO:0007606.value <= threshold=1.7004631757736206
node_1239: feature_name=GO:0006734	GO:0006734.value <= threshold=0.3861302584409714
node_1240: feature_name=GO:0051703	GO:0051703.value <= threshold=0.8428163230419159
node_1241: feature_name=GO:0021801	GO:0021801.value <= threshold=0.22415633499622345
node_1242: feature_name=GO:0071944	GO:0071944.value <= threshold=1.6467773914337158
node_1243: feature_name=GO:0071322	GO:0071322.value <= threshold=0.16985763609409332
node_1244: feature_name=GO:0023052	GO:0023052.value > threshold=0.25553081929683685
Class: KIRC
Rules_85	passed counts:7
node_0: feature_name=GO:0019002	GO:0019002.value <= threshold=0.44260887801647186
node_1: feature_name=GO:0031052	GO:0031052.value <= threshold=1.5308658480644226
node_2: feature_name=GO:0044028	GO:0044028.value <= threshold=2.612712264060974
node_3: feature_name=GO:0061428	GO:0061428.value <= threshold=1.6541950702667236
node_4: feature_name=hsa05210	hsa05210.value > threshold=0.010015622712671757
node_842: feature_name=GO:0051717	GO:0051717.value <= threshold=0.5213537216186523
node_843: feature_name=hsa04740	hsa04740.value <= threshold=0.4976523220539093
node_844: feature_name=GO:0007608	GO:0007608.value > threshold=4.729525570201787e-05
node_940: feature_name=GO:0007275	GO:0007275.value <= threshold=3.126664400100708
node_941: feature_name=GO:0006306	GO:0006306.value > threshold=0.3354291766881943
node_1061: feature_name=hsa05218	hsa05218.value > threshold=0.3431559354066849
node_1087: feature_name=GO:0048812	GO:0048812.value > threshold=0.37602490186691284
node_1109: feature_name=GO:0030539	GO:0030539.value <= threshold=0.9518836438655853
node_1110: feature_name=GO:0065009	GO:0065009.value > threshold=0.22621223330497742
node_1128: feature_name=hsa04740	hsa04740.value > threshold=0.00947558181360364
node_1132: feature_name=GO:0098590	GO:0098590.value <= threshold=0.4255889356136322
node_1133: feature_name=hsa05410	hsa05410.value <= threshold=0.4523991346359253
node_1134: feature_name=GO:0031294	GO:0031294.value > threshold=0.19281524419784546
Class: HNSC
Rules_86	passed counts:7
node_0: feature_name=GO:0019002	GO:0019002.value <= threshold=0.44260887801647186
node_1: feature_name=GO:0031052	GO:0031052.value <= threshold=1.5308658480644226
node_2: feature_name=GO:0044028	GO:0044028.value <= threshold=2.612712264060974
node_3: feature_name=GO:0061428	GO:0061428.value <= threshold=1.6541950702667236
node_4: feature_name=hsa05210	hsa05210.value > threshold=0.010015622712671757
node_842: feature_name=GO:0051717	GO:0051717.value <= threshold=0.5213537216186523
node_843: feature_name=hsa04740	hsa04740.value <= threshold=0.4976523220539093
node_844: feature_name=GO:0007608	GO:0007608.value > threshold=4.729525570201787e-05
node_940: feature_name=GO:0007275	GO:0007275.value <= threshold=3.126664400100708
node_941: feature_name=GO:0006306	GO:0006306.value > threshold=0.3354291766881943
node_1061: feature_name=hsa05218	hsa05218.value <= threshold=0.3431559354066849
node_1062: feature_name=w239	w239.value > threshold=0.10396400094032288
node_1064: feature_name=GO:0044346	GO:0044346.value > threshold=0.49414487183094025
node_1080: feature_name=GO:0007186	GO:0007186.value <= threshold=0.6027192175388336
node_1081: feature_name=GO:2000209	GO:2000209.value <= threshold=1.1423583328723907
Class: LUSC
Rules_87	passed counts:7
node_0: feature_name=GO:0019002	GO:0019002.value <= threshold=0.44260887801647186
node_1: feature_name=GO:0031052	GO:0031052.value <= threshold=1.5308658480644226
node_2: feature_name=GO:0044028	GO:0044028.value <= threshold=2.612712264060974
node_3: feature_name=GO:0061428	GO:0061428.value <= threshold=1.6541950702667236
node_4: feature_name=hsa05210	hsa05210.value <= threshold=0.010015622712671757
node_5: feature_name=GO:0051049	GO:0051049.value > threshold=0.001117223291657865
node_85: feature_name=GO:0031657	GO:0031657.value <= threshold=1.516840398311615
node_86: feature_name=GO:0044030	GO:0044030.value <= threshold=1.7840761542320251
node_87: feature_name=GO:0004872	GO:0004872.value > threshold=0.6798067986965179
node_575: feature_name=GO:0050907	GO:0050907.value > threshold=1.8050302863121033
node_775: feature_name=GO:0046854	GO:0046854.value > threshold=0.33894410729408264
node_789: feature_name=hsa05200	hsa05200.value <= threshold=0.6149373650550842
Class: LUSC
Rules_88	passed counts:7
node_0: feature_name=GO:0019002	GO:0019002.value <= threshold=0.44260887801647186
node_1: feature_name=GO:0031052	GO:0031052.value <= threshold=1.5308658480644226
node_2: feature_name=GO:0044028	GO:0044028.value <= threshold=2.612712264060974
node_3: feature_name=GO:0061428	GO:0061428.value <= threshold=1.6541950702667236
node_4: feature_name=hsa05210	hsa05210.value <= threshold=0.010015622712671757
node_5: feature_name=GO:0051049	GO:0051049.value > threshold=0.001117223291657865
node_85: feature_name=GO:0031657	GO:0031657.value <= threshold=1.516840398311615
node_86: feature_name=GO:0044030	GO:0044030.value <= threshold=1.7840761542320251
node_87: feature_name=GO:0004872	GO:0004872.value <= threshold=0.6798067986965179
node_88: feature_name=GO:0019899	GO:0019899.value > threshold=0.005233323434367776
node_122: feature_name=GO:0042391	GO:0042391.value <= threshold=0.38280558586120605
node_123: feature_name=GO:0005886	GO:0005886.value > threshold=0.42232681810855865
node_263: feature_name=GO:0043167	GO:0043167.value > threshold=1.177414894104004
node_345: feature_name=hsa04919	hsa04919.value <= threshold=0.21158312261104584
node_346: feature_name=GO:0031012	GO:0031012.value <= threshold=0.43924836814403534
node_347: feature_name=GO:0000904	GO:0000904.value > threshold=0.11430664733052254
node_355: feature_name=w45	w45.value <= threshold=0.3435869961977005
Class: BRCA
Rules_89	passed counts:7
node_0: feature_name=GO:0019002	GO:0019002.value <= threshold=0.44260887801647186
node_1: feature_name=GO:0031052	GO:0031052.value <= threshold=1.5308658480644226
node_2: feature_name=GO:0044028	GO:0044028.value <= threshold=2.612712264060974
node_3: feature_name=GO:0061428	GO:0061428.value <= threshold=1.6541950702667236
node_4: feature_name=hsa05210	hsa05210.value <= threshold=0.010015622712671757
node_5: feature_name=GO:0051049	GO:0051049.value > threshold=0.001117223291657865
node_85: feature_name=GO:0031657	GO:0031657.value <= threshold=1.516840398311615
node_86: feature_name=GO:0044030	GO:0044030.value <= threshold=1.7840761542320251
node_87: feature_name=GO:0004872	GO:0004872.value <= threshold=0.6798067986965179
node_88: feature_name=GO:0019899	GO:0019899.value > threshold=0.005233323434367776
node_122: feature_name=GO:0042391	GO:0042391.value <= threshold=0.38280558586120605
node_123: feature_name=GO:0005886	GO:0005886.value > threshold=0.42232681810855865
node_263: feature_name=GO:0043167	GO:0043167.value <= threshold=1.177414894104004
node_264: feature_name=GO:0010661	GO:0010661.value <= threshold=0.6713261604309082
node_265: feature_name=GO:0005575	GO:0005575.value <= threshold=0.4431428909301758
node_266: feature_name=GO:0032879	GO:0032879.value > threshold=0.11541628837585449
node_284: feature_name=hsa04620	hsa04620.value <= threshold=0.4165951758623123
node_285: feature_name=w239	w239.value > threshold=0.08639749884605408
node_293: feature_name=w182	w182.value > threshold=0.27764999866485596
node_303: feature_name=GO:0097458	GO:0097458.value <= threshold=0.5235969722270966
node_304: feature_name=GO:0005887	GO:0005887.value > threshold=0.27726835012435913
node_312: feature_name=GO:0007606	GO:0007606.value <= threshold=0.5798193067312241
Class: BRCA
Rules_90	passed counts:7
node_0: feature_name=GO:0019002	GO:0019002.value <= threshold=0.44260887801647186
node_1: feature_name=GO:0031052	GO:0031052.value <= threshold=1.5308658480644226
node_2: feature_name=GO:0044028	GO:0044028.value <= threshold=2.612712264060974
node_3: feature_name=GO:0061428	GO:0061428.value <= threshold=1.6541950702667236
node_4: feature_name=hsa05210	hsa05210.value <= threshold=0.010015622712671757
node_5: feature_name=GO:0051049	GO:0051049.value > threshold=0.001117223291657865
node_85: feature_name=GO:0031657	GO:0031657.value <= threshold=1.516840398311615
node_86: feature_name=GO:0044030	GO:0044030.value <= threshold=1.7840761542320251
node_87: feature_name=GO:0004872	GO:0004872.value <= threshold=0.6798067986965179
node_88: feature_name=GO:0019899	GO:0019899.value > threshold=0.005233323434367776
node_122: feature_name=GO:0042391	GO:0042391.value <= threshold=0.38280558586120605
node_123: feature_name=GO:0005886	GO:0005886.value > threshold=0.42232681810855865
node_263: feature_name=GO:0043167	GO:0043167.value <= threshold=1.177414894104004
node_264: feature_name=GO:0010661	GO:0010661.value <= threshold=0.6713261604309082
node_265: feature_name=GO:0005575	GO:0005575.value <= threshold=0.4431428909301758
node_266: feature_name=GO:0032879	GO:0032879.value <= threshold=0.11541628837585449
node_267: feature_name=GO:1902578	GO:1902578.value <= threshold=0.17411309480667114
node_268: feature_name=w182	w182.value <= threshold=0.3032954931259155
node_269: feature_name=GO:0050852	GO:0050852.value <= threshold=0.7076388597488403
Class: OV
Rules_91	passed counts:6
node_0: feature_name=GO:0019002	GO:0019002.value > threshold=0.44260887801647186
node_1878: feature_name=GO:0019002	GO:0019002.value <= threshold=1.837906301021576
node_1879: feature_name=GO:0007608	GO:0007608.value <= threshold=0.7746693193912506
node_1880: feature_name=GO:0007275	GO:0007275.value <= threshold=2.779351592063904
node_1881: feature_name=hsa00562	hsa00562.value <= threshold=0.5940376818180084
node_1882: feature_name=hsa04740	hsa04740.value > threshold=0.08753589168190956
node_1888: feature_name=GO:0006983	GO:0006983.value <= threshold=1.1732970178127289
Class: LUAD
Rules_92	passed counts:6
node_0: feature_name=GO:0019002	GO:0019002.value <= threshold=0.44260887801647186
node_1: feature_name=GO:0031052	GO:0031052.value > threshold=1.5308658480644226
node_1395: feature_name=hsa05214	hsa05214.value > threshold=1.511171042919159
node_1751: feature_name=GO:0043560	GO:0043560.value > threshold=1.633065402507782
node_1851: feature_name=w182	w182.value > threshold=0.2966039925813675
node_1859: feature_name=hsa05213	hsa05213.value > threshold=2.6327033042907715
node_1865: feature_name=GO:0044767	GO:0044767.value > threshold=1.1150805950164795
node_1873: feature_name=GO:0042391	GO:0042391.value <= threshold=1.2321107387542725
Class: UCEC
Rules_93	passed counts:6
node_0: feature_name=GO:0019002	GO:0019002.value <= threshold=0.44260887801647186
node_1: feature_name=GO:0031052	GO:0031052.value > threshold=1.5308658480644226
node_1395: feature_name=hsa05214	hsa05214.value > threshold=1.511171042919159
node_1751: feature_name=GO:0043560	GO:0043560.value <= threshold=1.633065402507782
node_1752: feature_name=GO:0031657	GO:0031657.value <= threshold=1.520110011100769
node_1753: feature_name=GO:0010225	GO:0010225.value <= threshold=3.0487908124923706
node_1754: feature_name=GO:0003266	GO:0003266.value <= threshold=1.4739093780517578
node_1755: feature_name=GO:0050807	GO:0050807.value <= threshold=0.2123531550168991
node_1756: feature_name=GO:0006302	GO:0006302.value <= threshold=1.3659553527832031
node_1757: feature_name=GO:0032879	GO:0032879.value <= threshold=1.462652862071991
node_1758: feature_name=GO:0007600	GO:0007600.value <= threshold=0.09238758310675621
node_1759: feature_name=hsa04550	hsa04550.value <= threshold=0.7176839709281921
node_1760: feature_name=GO:0072332	GO:0072332.value <= threshold=1.82169771194458
Class: BRCA
Rules_94	passed counts:6
node_0: feature_name=GO:0019002	GO:0019002.value <= threshold=0.44260887801647186
node_1: feature_name=GO:0031052	GO:0031052.value > threshold=1.5308658480644226
node_1395: feature_name=hsa05214	hsa05214.value <= threshold=1.511171042919159
node_1396: feature_name=GO:0042772	GO:0042772.value > threshold=1.405928909778595
node_1554: feature_name=GO:0001508	GO:0001508.value > threshold=1.8742843270301819
node_1744: feature_name=GO:0098742	GO:0098742.value <= threshold=0.6159619987010956
Class: BRCA
Rules_95	passed counts:6
node_0: feature_name=GO:0019002	GO:0019002.value <= threshold=0.44260887801647186
node_1: feature_name=GO:0031052	GO:0031052.value > threshold=1.5308658480644226
node_1395: feature_name=hsa05214	hsa05214.value <= threshold=1.511171042919159
node_1396: feature_name=GO:0042772	GO:0042772.value <= threshold=1.405928909778595
node_1397: feature_name=GO:0010661	GO:0010661.value > threshold=0.293410062789917
node_1427: feature_name=GO:1900119	GO:1900119.value <= threshold=1.3893239498138428
node_1428: feature_name=GO:0048856	GO:0048856.value > threshold=0.25651074945926666
node_1434: feature_name=GO:0033028	GO:0033028.value <= threshold=0.44549858570098877
node_1435: feature_name=GO:0005261	GO:0005261.value > threshold=0.2745572403073311
node_1443: feature_name=GO:0097458	GO:0097458.value <= threshold=0.5130167156457901
node_1444: feature_name=GO:0042391	GO:0042391.value > threshold=0.17883391305804253
Class: COADREAD
Rules_96	passed counts:6
node_0: feature_name=GO:0019002	GO:0019002.value <= threshold=0.44260887801647186
node_1: feature_name=GO:0031052	GO:0031052.value <= threshold=1.5308658480644226
node_2: feature_name=GO:0044028	GO:0044028.value > threshold=2.612712264060974
node_1368: feature_name=GO:0035112	GO:0035112.value <= threshold=0.8113309741020203
node_1369: feature_name=hsa04914	hsa04914.value <= threshold=0.8201488554477692
node_1370: feature_name=GO:0023052	GO:0023052.value > threshold=0.4763796478509903
node_1374: feature_name=GO:0009611	GO:0009611.value > threshold=0.6699075847864151
node_1378: feature_name=GO:0004888	GO:0004888.value > threshold=0.20677608251571655
Class: UCEC
Rules_97	passed counts:6
node_0: feature_name=GO:0019002	GO:0019002.value <= threshold=0.44260887801647186
node_1: feature_name=GO:0031052	GO:0031052.value <= threshold=1.5308658480644226
node_2: feature_name=GO:0044028	GO:0044028.value <= threshold=2.612712264060974
node_3: feature_name=GO:0061428	GO:0061428.value <= threshold=1.6541950702667236
node_4: feature_name=hsa05210	hsa05210.value > threshold=0.010015622712671757
node_842: feature_name=GO:0051717	GO:0051717.value <= threshold=0.5213537216186523
node_843: feature_name=hsa04740	hsa04740.value > threshold=0.4976523220539093
node_1195: feature_name=hsa05210	hsa05210.value > threshold=0.4788101613521576
node_1237: feature_name=GO:0005218	GO:0005218.value > threshold=0.7114565074443817
node_1295: feature_name=GO:0031294	GO:0031294.value > threshold=0.4541195034980774
node_1323: feature_name=GO:0048643	GO:0048643.value <= threshold=0.08269377052783966
node_1324: feature_name=hsa04666	hsa04666.value > threshold=0.07019010931253433
Class: HNSC
Rules_98	passed counts:6
node_0: feature_name=GO:0019002	GO:0019002.value <= threshold=0.44260887801647186
node_1: feature_name=GO:0031052	GO:0031052.value <= threshold=1.5308658480644226
node_2: feature_name=GO:0044028	GO:0044028.value <= threshold=2.612712264060974
node_3: feature_name=GO:0061428	GO:0061428.value <= threshold=1.6541950702667236
node_4: feature_name=hsa05210	hsa05210.value > threshold=0.010015622712671757
node_842: feature_name=GO:0051717	GO:0051717.value <= threshold=0.5213537216186523
node_843: feature_name=hsa04740	hsa04740.value <= threshold=0.4976523220539093
node_844: feature_name=GO:0007608	GO:0007608.value > threshold=4.729525570201787e-05
node_940: feature_name=GO:0007275	GO:0007275.value > threshold=3.126664400100708
node_1162: feature_name=GO:0016021	GO:0016021.value <= threshold=0.35144393146038055
node_1163: feature_name=hsa04740	hsa04740.value <= threshold=0.06710989587008953
node_1164: feature_name=hsa04932	hsa04932.value <= threshold=0.13133185356855392
Class: UCEC
Rules_99	passed counts:6
node_0: feature_name=GO:0019002	GO:0019002.value <= threshold=0.44260887801647186
node_1: feature_name=GO:0031052	GO:0031052.value <= threshold=1.5308658480644226
node_2: feature_name=GO:0044028	GO:0044028.value <= threshold=2.612712264060974
node_3: feature_name=GO:0061428	GO:0061428.value <= threshold=1.6541950702667236
node_4: feature_name=hsa05210	hsa05210.value > threshold=0.010015622712671757
node_842: feature_name=GO:0051717	GO:0051717.value <= threshold=0.5213537216186523
node_843: feature_name=hsa04740	hsa04740.value <= threshold=0.4976523220539093
node_844: feature_name=GO:0007608	GO:0007608.value > threshold=4.729525570201787e-05
node_940: feature_name=GO:0007275	GO:0007275.value <= threshold=3.126664400100708
node_941: feature_name=GO:0006306	GO:0006306.value <= threshold=0.3354291766881943
node_942: feature_name=GO:1902108	GO:1902108.value > threshold=0.09483636170625687
node_994: feature_name=GO:0035033	GO:0035033.value > threshold=1.4224371314048767
node_1040: feature_name=GO:0006302	GO:0006302.value <= threshold=0.3897097557783127
node_1041: feature_name=GO:0005886	GO:0005886.value > threshold=1.0470283031463623
Class: COADREAD
Rules_100	passed counts:6
node_0: feature_name=GO:0019002	GO:0019002.value <= threshold=0.44260887801647186
node_1: feature_name=GO:0031052	GO:0031052.value <= threshold=1.5308658480644226
node_2: feature_name=GO:0044028	GO:0044028.value <= threshold=2.612712264060974
node_3: feature_name=GO:0061428	GO:0061428.value <= threshold=1.6541950702667236
node_4: feature_name=hsa05210	hsa05210.value > threshold=0.010015622712671757
node_842: feature_name=GO:0051717	GO:0051717.value <= threshold=0.5213537216186523
node_843: feature_name=hsa04740	hsa04740.value <= threshold=0.4976523220539093
node_844: feature_name=GO:0007608	GO:0007608.value > threshold=4.729525570201787e-05
node_940: feature_name=GO:0007275	GO:0007275.value <= threshold=3.126664400100708
node_941: feature_name=GO:0006306	GO:0006306.value <= threshold=0.3354291766881943
node_942: feature_name=GO:1902108	GO:1902108.value <= threshold=0.09483636170625687
node_943: feature_name=hsa04150	hsa04150.value <= threshold=0.8822639584541321
node_944: feature_name=hsa05210	hsa05210.value <= threshold=1.2284520268440247
node_945: feature_name=GO:0097651	GO:0097651.value <= threshold=1.4858229756355286
node_946: feature_name=GO:0071313	GO:0071313.value <= threshold=0.709622859954834
node_947: feature_name=hsa04152	hsa04152.value <= threshold=0.3257712870836258
node_948: feature_name=GO:0045333	GO:0045333.value > threshold=0.004846309311687946
node_964: feature_name=GO:0060429	GO:0060429.value > threshold=0.09565235674381256
Class: COADREAD
Rules_101	passed counts:6
node_0: feature_name=GO:0019002	GO:0019002.value <= threshold=0.44260887801647186
node_1: feature_name=GO:0031052	GO:0031052.value <= threshold=1.5308658480644226
node_2: feature_name=GO:0044028	GO:0044028.value <= threshold=2.612712264060974
node_3: feature_name=GO:0061428	GO:0061428.value <= threshold=1.6541950702667236
node_4: feature_name=hsa05210	hsa05210.value > threshold=0.010015622712671757
node_842: feature_name=GO:0051717	GO:0051717.value <= threshold=0.5213537216186523
node_843: feature_name=hsa04740	hsa04740.value <= threshold=0.4976523220539093
node_844: feature_name=GO:0007608	GO:0007608.value <= threshold=4.729525570201787e-05
node_845: feature_name=GO:0060572	GO:0060572.value <= threshold=0.08363711833953857
node_846: feature_name=GO:0090199	GO:0090199.value <= threshold=0.9668825268745422
node_847: feature_name=GO:0048715	GO:0048715.value <= threshold=1.045529842376709
node_848: feature_name=w182	w182.value > threshold=0.2845204919576645
node_878: feature_name=GO:0048468	GO:0048468.value > threshold=0.201687753200531
node_882: feature_name=GO:0022836	GO:0022836.value > threshold=0.7722557187080383
node_910: feature_name=hsa05218	hsa05218.value <= threshold=0.6439429223537445
node_911: feature_name=GO:0005509	GO:0005509.value > threshold=0.61744424700737
Class: COADREAD
Rules_102	passed counts:6
node_0: feature_name=GO:0019002	GO:0019002.value <= threshold=0.44260887801647186
node_1: feature_name=GO:0031052	GO:0031052.value <= threshold=1.5308658480644226
node_2: feature_name=GO:0044028	GO:0044028.value <= threshold=2.612712264060974
node_3: feature_name=GO:0061428	GO:0061428.value <= threshold=1.6541950702667236
node_4: feature_name=hsa05210	hsa05210.value > threshold=0.010015622712671757
node_842: feature_name=GO:0051717	GO:0051717.value <= threshold=0.5213537216186523
node_843: feature_name=hsa04740	hsa04740.value <= threshold=0.4976523220539093
node_844: feature_name=GO:0007608	GO:0007608.value <= threshold=4.729525570201787e-05
node_845: feature_name=GO:0060572	GO:0060572.value <= threshold=0.08363711833953857
node_846: feature_name=GO:0090199	GO:0090199.value <= threshold=0.9668825268745422
node_847: feature_name=GO:0048715	GO:0048715.value <= threshold=1.045529842376709
node_848: feature_name=w182	w182.value > threshold=0.2845204919576645
node_878: feature_name=GO:0048468	GO:0048468.value > threshold=0.201687753200531
node_882: feature_name=GO:0022836	GO:0022836.value <= threshold=0.7722557187080383
node_883: feature_name=GO:0007420	GO:0007420.value > threshold=0.49322575330734253
node_901: feature_name=GO:0051606	GO:0051606.value > threshold=0.008787635713815689
node_905: feature_name=GO:0032879	GO:0032879.value <= threshold=1.0141392350196838
Class: HNSC
Rules_103	passed counts:6
node_0: feature_name=GO:0019002	GO:0019002.value <= threshold=0.44260887801647186
node_1: feature_name=GO:0031052	GO:0031052.value <= threshold=1.5308658480644226
node_2: feature_name=GO:0044028	GO:0044028.value <= threshold=2.612712264060974
node_3: feature_name=GO:0061428	GO:0061428.value <= threshold=1.6541950702667236
node_4: feature_name=hsa05210	hsa05210.value > threshold=0.010015622712671757
node_842: feature_name=GO:0051717	GO:0051717.value <= threshold=0.5213537216186523
node_843: feature_name=hsa04740	hsa04740.value <= threshold=0.4976523220539093
node_844: feature_name=GO:0007608	GO:0007608.value <= threshold=4.729525570201787e-05
node_845: feature_name=GO:0060572	GO:0060572.value <= threshold=0.08363711833953857
node_846: feature_name=GO:0090199	GO:0090199.value <= threshold=0.9668825268745422
node_847: feature_name=GO:0048715	GO:0048715.value <= threshold=1.045529842376709
node_848: feature_name=w182	w182.value > threshold=0.2845204919576645
node_878: feature_name=GO:0048468	GO:0048468.value > threshold=0.201687753200531
node_882: feature_name=GO:0022836	GO:0022836.value <= threshold=0.7722557187080383
node_883: feature_name=GO:0007420	GO:0007420.value <= threshold=0.49322575330734253
node_884: feature_name=hsa05213	hsa05213.value <= threshold=1.7228277325630188
node_885: feature_name=GO:0040007	GO:0040007.value > threshold=0.29149341583251953
node_893: feature_name=hsa04919	hsa04919.value <= threshold=1.2071317434310913
node_894: feature_name=w239	w239.value <= threshold=0.14541999995708466
Class: BRCA
Rules_104	passed counts:6
node_0: feature_name=GO:0019002	GO:0019002.value <= threshold=0.44260887801647186
node_1: feature_name=GO:0031052	GO:0031052.value <= threshold=1.5308658480644226
node_2: feature_name=GO:0044028	GO:0044028.value <= threshold=2.612712264060974
node_3: feature_name=GO:0061428	GO:0061428.value <= threshold=1.6541950702667236
node_4: feature_name=hsa05210	hsa05210.value > threshold=0.010015622712671757
node_842: feature_name=GO:0051717	GO:0051717.value <= threshold=0.5213537216186523
node_843: feature_name=hsa04740	hsa04740.value <= threshold=0.4976523220539093
node_844: feature_name=GO:0007608	GO:0007608.value <= threshold=4.729525570201787e-05
node_845: feature_name=GO:0060572	GO:0060572.value <= threshold=0.08363711833953857
node_846: feature_name=GO:0090199	GO:0090199.value <= threshold=0.9668825268745422
node_847: feature_name=GO:0048715	GO:0048715.value <= threshold=1.045529842376709
node_848: feature_name=w182	w182.value > threshold=0.2845204919576645
node_878: feature_name=GO:0048468	GO:0048468.value <= threshold=0.201687753200531
node_879: feature_name=GO:0005886	GO:0005886.value > threshold=0.10072563961148262
Class: BRCA
Rules_105	passed counts:6
node_0: feature_name=GO:0019002	GO:0019002.value <= threshold=0.44260887801647186
node_1: feature_name=GO:0031052	GO:0031052.value <= threshold=1.5308658480644226
node_2: feature_name=GO:0044028	GO:0044028.value <= threshold=2.612712264060974
node_3: feature_name=GO:0061428	GO:0061428.value <= threshold=1.6541950702667236
node_4: feature_name=hsa05210	hsa05210.value <= threshold=0.010015622712671757
node_5: feature_name=GO:0051049	GO:0051049.value > threshold=0.001117223291657865
node_85: feature_name=GO:0031657	GO:0031657.value <= threshold=1.516840398311615
node_86: feature_name=GO:0044030	GO:0044030.value <= threshold=1.7840761542320251
node_87: feature_name=GO:0004872	GO:0004872.value > threshold=0.6798067986965179
node_575: feature_name=GO:0050907	GO:0050907.value <= threshold=1.8050302863121033
node_576: feature_name=n419	n419.value > threshold=-0.044234998524188995
node_598: feature_name=GO:0022838	GO:0022838.value > threshold=0.062499335035681725
node_634: feature_name=GO:0022008	GO:0022008.value <= threshold=2.9196107387542725
node_635: feature_name=GO:0043167	GO:0043167.value <= threshold=1.1558712124824524
node_636: feature_name=GO:0007186	GO:0007186.value > threshold=0.8086933195590973
node_702: feature_name=hsa04932	hsa04932.value > threshold=0.27395470440387726
Class: GBM
Rules_106	passed counts:6
node_0: feature_name=GO:0019002	GO:0019002.value <= threshold=0.44260887801647186
node_1: feature_name=GO:0031052	GO:0031052.value <= threshold=1.5308658480644226
node_2: feature_name=GO:0044028	GO:0044028.value <= threshold=2.612712264060974
node_3: feature_name=GO:0061428	GO:0061428.value <= threshold=1.6541950702667236
node_4: feature_name=hsa05210	hsa05210.value <= threshold=0.010015622712671757
node_5: feature_name=GO:0051049	GO:0051049.value > threshold=0.001117223291657865
node_85: feature_name=GO:0031657	GO:0031657.value <= threshold=1.516840398311615
node_86: feature_name=GO:0044030	GO:0044030.value <= threshold=1.7840761542320251
node_87: feature_name=GO:0004872	GO:0004872.value > threshold=0.6798067986965179
node_575: feature_name=GO:0050907	GO:0050907.value <= threshold=1.8050302863121033
node_576: feature_name=n419	n419.value > threshold=-0.044234998524188995
node_598: feature_name=GO:0022838	GO:0022838.value > threshold=0.062499335035681725
node_634: feature_name=GO:0022008	GO:0022008.value <= threshold=2.9196107387542725
node_635: feature_name=GO:0043167	GO:0043167.value <= threshold=1.1558712124824524
node_636: feature_name=GO:0007186	GO:0007186.value <= threshold=0.8086933195590973
node_637: feature_name=w45	w45.value > threshold=0.3224470019340515
node_653: feature_name=w34	w34.value <= threshold=-0.03440850041806698
node_654: feature_name=GO:0098662	GO:0098662.value <= threshold=1.4258143305778503
node_655: feature_name=GO:0001508	GO:0001508.value > threshold=1.402309536933899
Class: COADREAD
Rules_107	passed counts:6
node_0: feature_name=GO:0019002	GO:0019002.value <= threshold=0.44260887801647186
node_1: feature_name=GO:0031052	GO:0031052.value <= threshold=1.5308658480644226
node_2: feature_name=GO:0044028	GO:0044028.value <= threshold=2.612712264060974
node_3: feature_name=GO:0061428	GO:0061428.value <= threshold=1.6541950702667236
node_4: feature_name=hsa05210	hsa05210.value <= threshold=0.010015622712671757
node_5: feature_name=GO:0051049	GO:0051049.value > threshold=0.001117223291657865
node_85: feature_name=GO:0031657	GO:0031657.value <= threshold=1.516840398311615
node_86: feature_name=GO:0044030	GO:0044030.value <= threshold=1.7840761542320251
node_87: feature_name=GO:0004872	GO:0004872.value > threshold=0.6798067986965179
node_575: feature_name=GO:0050907	GO:0050907.value <= threshold=1.8050302863121033
node_576: feature_name=n419	n419.value > threshold=-0.044234998524188995
node_598: feature_name=GO:0022838	GO:0022838.value > threshold=0.062499335035681725
node_634: feature_name=GO:0022008	GO:0022008.value <= threshold=2.9196107387542725
node_635: feature_name=GO:0043167	GO:0043167.value <= threshold=1.1558712124824524
node_636: feature_name=GO:0007186	GO:0007186.value <= threshold=0.8086933195590973
node_637: feature_name=w45	w45.value > threshold=0.3224470019340515
node_653: feature_name=w34	w34.value <= threshold=-0.03440850041806698
node_654: feature_name=GO:0098662	GO:0098662.value <= threshold=1.4258143305778503
node_655: feature_name=GO:0001508	GO:0001508.value <= threshold=1.402309536933899
node_656: feature_name=GO:2000026	GO:2000026.value <= threshold=0.4782547503709793
node_657: feature_name=GO:0055008	GO:0055008.value > threshold=0.8074085712432861
node_673: feature_name=GO:0044767	GO:0044767.value > threshold=0.4362826645374298
Class: COADREAD
Rules_108	passed counts:6
node_0: feature_name=GO:0019002	GO:0019002.value <= threshold=0.44260887801647186
node_1: feature_name=GO:0031052	GO:0031052.value <= threshold=1.5308658480644226
node_2: feature_name=GO:0044028	GO:0044028.value <= threshold=2.612712264060974
node_3: feature_name=GO:0061428	GO:0061428.value <= threshold=1.6541950702667236
node_4: feature_name=hsa05210	hsa05210.value <= threshold=0.010015622712671757
node_5: feature_name=GO:0051049	GO:0051049.value > threshold=0.001117223291657865
node_85: feature_name=GO:0031657	GO:0031657.value <= threshold=1.516840398311615
node_86: feature_name=GO:0044030	GO:0044030.value <= threshold=1.7840761542320251
node_87: feature_name=GO:0004872	GO:0004872.value <= threshold=0.6798067986965179
node_88: feature_name=GO:0019899	GO:0019899.value > threshold=0.005233323434367776
node_122: feature_name=GO:0042391	GO:0042391.value > threshold=0.38280558586120605
node_394: feature_name=GO:0048589	GO:0048589.value > threshold=0.0312800258398056
node_434: feature_name=GO:0048731	GO:0048731.value > threshold=0.19495543837547302
node_452: feature_name=hsa04530	hsa04530.value > threshold=0.5746428370475769
node_548: feature_name=w131	w131.value <= threshold=0.1733195036649704
node_549: feature_name=GO:0005161	GO:0005161.value <= threshold=0.4629119634628296
node_550: feature_name=GO:0005575	GO:0005575.value > threshold=0.11834193766117096
node_552: feature_name=GO:0050821	GO:0050821.value <= threshold=0.5012421011924744
node_553: feature_name=GO:0004872	GO:0004872.value <= threshold=0.1943340227007866
node_554: feature_name=GO:0032879	GO:0032879.value > threshold=0.15100274607539177
Class: HNSC
Rules_109	passed counts:6
node_0: feature_name=GO:0019002	GO:0019002.value <= threshold=0.44260887801647186
node_1: feature_name=GO:0031052	GO:0031052.value <= threshold=1.5308658480644226
node_2: feature_name=GO:0044028	GO:0044028.value <= threshold=2.612712264060974
node_3: feature_name=GO:0061428	GO:0061428.value <= threshold=1.6541950702667236
node_4: feature_name=hsa05210	hsa05210.value <= threshold=0.010015622712671757
node_5: feature_name=GO:0051049	GO:0051049.value > threshold=0.001117223291657865
node_85: feature_name=GO:0031657	GO:0031657.value <= threshold=1.516840398311615
node_86: feature_name=GO:0044030	GO:0044030.value <= threshold=1.7840761542320251
node_87: feature_name=GO:0004872	GO:0004872.value <= threshold=0.6798067986965179
node_88: feature_name=GO:0019899	GO:0019899.value > threshold=0.005233323434367776
node_122: feature_name=GO:0042391	GO:0042391.value > threshold=0.38280558586120605
node_394: feature_name=GO:0048589	GO:0048589.value > threshold=0.0312800258398056
node_434: feature_name=GO:0048731	GO:0048731.value > threshold=0.19495543837547302
node_452: feature_name=hsa04530	hsa04530.value <= threshold=0.5746428370475769
node_453: feature_name=GO:0045595	GO:0045595.value <= threshold=1.769000768661499
node_454: feature_name=GO:0007156	GO:0007156.value <= threshold=1.0433965921401978
node_455: feature_name=GO:2000026	GO:2000026.value > threshold=0.18738730996847153
node_473: feature_name=GO:0098590	GO:0098590.value > threshold=0.2749122530221939
node_479: feature_name=GO:0043005	GO:0043005.value <= threshold=0.48298998177051544
node_480: feature_name=GO:0022008	GO:0022008.value > threshold=0.3033222407102585
node_482: feature_name=GO:0032879	GO:0032879.value <= threshold=0.7292580306529999
node_483: feature_name=GO:2000008	GO:2000008.value <= threshold=1.186858892440796
Class: OV
Rules_110	passed counts:6
node_0: feature_name=GO:0019002	GO:0019002.value <= threshold=0.44260887801647186
node_1: feature_name=GO:0031052	GO:0031052.value <= threshold=1.5308658480644226
node_2: feature_name=GO:0044028	GO:0044028.value <= threshold=2.612712264060974
node_3: feature_name=GO:0061428	GO:0061428.value <= threshold=1.6541950702667236
node_4: feature_name=hsa05210	hsa05210.value <= threshold=0.010015622712671757
node_5: feature_name=GO:0051049	GO:0051049.value > threshold=0.001117223291657865
node_85: feature_name=GO:0031657	GO:0031657.value <= threshold=1.516840398311615
node_86: feature_name=GO:0044030	GO:0044030.value <= threshold=1.7840761542320251
node_87: feature_name=GO:0004872	GO:0004872.value <= threshold=0.6798067986965179
node_88: feature_name=GO:0019899	GO:0019899.value > threshold=0.005233323434367776
node_122: feature_name=GO:0042391	GO:0042391.value > threshold=0.38280558586120605
node_394: feature_name=GO:0048589	GO:0048589.value > threshold=0.0312800258398056
node_434: feature_name=GO:0048731	GO:0048731.value > threshold=0.19495543837547302
node_452: feature_name=hsa04530	hsa04530.value <= threshold=0.5746428370475769
node_453: feature_name=GO:0045595	GO:0045595.value <= threshold=1.769000768661499
node_454: feature_name=GO:0007156	GO:0007156.value <= threshold=1.0433965921401978
node_455: feature_name=GO:2000026	GO:2000026.value <= threshold=0.18738730996847153
node_456: feature_name=GO:0044085	GO:0044085.value <= threshold=0.36407409608364105
node_457: feature_name=GO:0019899	GO:0019899.value > threshold=0.054095955565571785
node_461: feature_name=GO:0098589	GO:0098589.value <= threshold=0.7955844700336456
Class: LAML
Rules_111	passed counts:6
node_0: feature_name=GO:0019002	GO:0019002.value <= threshold=0.44260887801647186
node_1: feature_name=GO:0031052	GO:0031052.value <= threshold=1.5308658480644226
node_2: feature_name=GO:0044028	GO:0044028.value <= threshold=2.612712264060974
node_3: feature_name=GO:0061428	GO:0061428.value <= threshold=1.6541950702667236
node_4: feature_name=hsa05210	hsa05210.value <= threshold=0.010015622712671757
node_5: feature_name=GO:0051049	GO:0051049.value > threshold=0.001117223291657865
node_85: feature_name=GO:0031657	GO:0031657.value <= threshold=1.516840398311615
node_86: feature_name=GO:0044030	GO:0044030.value <= threshold=1.7840761542320251
node_87: feature_name=GO:0004872	GO:0004872.value <= threshold=0.6798067986965179
node_88: feature_name=GO:0019899	GO:0019899.value > threshold=0.005233323434367776
node_122: feature_name=GO:0042391	GO:0042391.value <= threshold=0.38280558586120605
node_123: feature_name=GO:0005886	GO:0005886.value <= threshold=0.42232681810855865
node_124: feature_name=hsa04726	hsa04726.value > threshold=0.9402436017990112
node_258: feature_name=GO:0004984	GO:0004984.value <= threshold=0.1147647425532341
Class: BRCA
Rules_112	passed counts:6
node_0: feature_name=GO:0019002	GO:0019002.value <= threshold=0.44260887801647186
node_1: feature_name=GO:0031052	GO:0031052.value <= threshold=1.5308658480644226
node_2: feature_name=GO:0044028	GO:0044028.value <= threshold=2.612712264060974
node_3: feature_name=GO:0061428	GO:0061428.value <= threshold=1.6541950702667236
node_4: feature_name=hsa05210	hsa05210.value <= threshold=0.010015622712671757
node_5: feature_name=GO:0051049	GO:0051049.value > threshold=0.001117223291657865
node_85: feature_name=GO:0031657	GO:0031657.value <= threshold=1.516840398311615
node_86: feature_name=GO:0044030	GO:0044030.value <= threshold=1.7840761542320251
node_87: feature_name=GO:0004872	GO:0004872.value <= threshold=0.6798067986965179
node_88: feature_name=GO:0019899	GO:0019899.value > threshold=0.005233323434367776
node_122: feature_name=GO:0042391	GO:0042391.value <= threshold=0.38280558586120605
node_123: feature_name=GO:0005886	GO:0005886.value <= threshold=0.42232681810855865
node_124: feature_name=hsa04726	hsa04726.value <= threshold=0.9402436017990112
node_125: feature_name=GO:0048869	GO:0048869.value > threshold=1.0812776684761047
node_229: feature_name=GO:0007268	GO:0007268.value > threshold=0.36054185032844543
node_251: feature_name=GO:0016021	GO:0016021.value <= threshold=0.16964324563741684
node_252: feature_name=GO:0033057	GO:0033057.value <= threshold=0.6184920072555542
Class: OV
Rules_113	passed counts:6
node_0: feature_name=GO:0019002	GO:0019002.value <= threshold=0.44260887801647186
node_1: feature_name=GO:0031052	GO:0031052.value <= threshold=1.5308658480644226
node_2: feature_name=GO:0044028	GO:0044028.value <= threshold=2.612712264060974
node_3: feature_name=GO:0061428	GO:0061428.value <= threshold=1.6541950702667236
node_4: feature_name=hsa05210	hsa05210.value <= threshold=0.010015622712671757
node_5: feature_name=GO:0051049	GO:0051049.value > threshold=0.001117223291657865
node_85: feature_name=GO:0031657	GO:0031657.value <= threshold=1.516840398311615
node_86: feature_name=GO:0044030	GO:0044030.value <= threshold=1.7840761542320251
node_87: feature_name=GO:0004872	GO:0004872.value <= threshold=0.6798067986965179
node_88: feature_name=GO:0019899	GO:0019899.value > threshold=0.005233323434367776
node_122: feature_name=GO:0042391	GO:0042391.value <= threshold=0.38280558586120605
node_123: feature_name=GO:0005886	GO:0005886.value <= threshold=0.42232681810855865
node_124: feature_name=hsa04726	hsa04726.value <= threshold=0.9402436017990112
node_125: feature_name=GO:0048869	GO:0048869.value <= threshold=1.0812776684761047
node_126: feature_name=w45	w45.value <= threshold=0.3547459989786148
node_127: feature_name=GO:0005261	GO:0005261.value > threshold=0.5224916040897369
node_191: feature_name=GO:0009888	GO:0009888.value > threshold=0.5479658842086792
node_201: feature_name=GO:0051049	GO:0051049.value > threshold=0.18081451207399368
Class: KIRC
Rules_114	passed counts:6
node_0: feature_name=GO:0019002	GO:0019002.value <= threshold=0.44260887801647186
node_1: feature_name=GO:0031052	GO:0031052.value <= threshold=1.5308658480644226
node_2: feature_name=GO:0044028	GO:0044028.value <= threshold=2.612712264060974
node_3: feature_name=GO:0061428	GO:0061428.value <= threshold=1.6541950702667236
node_4: feature_name=hsa05210	hsa05210.value <= threshold=0.010015622712671757
node_5: feature_name=GO:0051049	GO:0051049.value > threshold=0.001117223291657865
node_85: feature_name=GO:0031657	GO:0031657.value <= threshold=1.516840398311615
node_86: feature_name=GO:0044030	GO:0044030.value <= threshold=1.7840761542320251
node_87: feature_name=GO:0004872	GO:0004872.value <= threshold=0.6798067986965179
node_88: feature_name=GO:0019899	GO:0019899.value > threshold=0.005233323434367776
node_122: feature_name=GO:0042391	GO:0042391.value <= threshold=0.38280558586120605
node_123: feature_name=GO:0005886	GO:0005886.value <= threshold=0.42232681810855865
node_124: feature_name=hsa04726	hsa04726.value <= threshold=0.9402436017990112
node_125: feature_name=GO:0048869	GO:0048869.value <= threshold=1.0812776684761047
node_126: feature_name=w45	w45.value <= threshold=0.3547459989786148
node_127: feature_name=GO:0005261	GO:0005261.value <= threshold=0.5224916040897369
node_128: feature_name=GO:1990440	GO:1990440.value <= threshold=0.6382570266723633
node_129: feature_name=w34	w34.value > threshold=-0.11230599880218506
node_143: feature_name=GO:0007063	GO:0007063.value <= threshold=1.8215383887290955
node_144: feature_name=GO:0098590	GO:0098590.value <= threshold=1.4683318734169006
node_145: feature_name=GO:0035176	GO:0035176.value <= threshold=1.1258912086486816
node_146: feature_name=GO:0040014	GO:0040014.value <= threshold=1.0648278892040253
node_147: feature_name=hsa05414	hsa05414.value <= threshold=1.6563720703125
node_148: feature_name=GO:0007268	GO:0007268.value <= threshold=1.13457453250885
node_149: feature_name=w189	w189.value <= threshold=0.02042499929666519
node_150: feature_name=GO:0065009	GO:0065009.value > threshold=0.09618088975548744
Class: KIRC
Rules_115	passed counts:5
node_0: feature_name=GO:0019002	GO:0019002.value > threshold=0.44260887801647186
node_1878: feature_name=GO:0019002	GO:0019002.value > threshold=1.837906301021576
node_1916: feature_name=GO:0005943	GO:0005943.value <= threshold=2.334170937538147
node_1917: feature_name=GO:0019002	GO:0019002.value <= threshold=2.587051510810852
node_1918: feature_name=hsa05215	hsa05215.value > threshold=0.49044638872146606
node_1928: feature_name=GO:0035116	GO:0035116.value <= threshold=1.0427671670913696
node_1929: feature_name=GO:0046872	GO:0046872.value > threshold=0.017841171007603407
node_1933: feature_name=GO:0001711	GO:0001711.value <= threshold=1.2391029596328735
node_1934: feature_name=GO:0048646	GO:0048646.value <= threshold=0.0765364058315754
node_1935: feature_name=w41	w41.value > threshold=-0.10593600198626518
Class: COADREAD
Rules_116	passed counts:5
node_0: feature_name=GO:0019002	GO:0019002.value > threshold=0.44260887801647186
node_1878: feature_name=GO:0019002	GO:0019002.value > threshold=1.837906301021576
node_1916: feature_name=GO:0005943	GO:0005943.value <= threshold=2.334170937538147
node_1917: feature_name=GO:0019002	GO:0019002.value <= threshold=2.587051510810852
node_1918: feature_name=hsa05215	hsa05215.value <= threshold=0.49044638872146606
node_1919: feature_name=hsa04740	hsa04740.value <= threshold=0.12822064012289047
node_1920: feature_name=GO:0048666	GO:0048666.value > threshold=0.48576119542121887
Class: COADREAD
Rules_117	passed counts:5
node_0: feature_name=GO:0019002	GO:0019002.value <= threshold=0.44260887801647186
node_1: feature_name=GO:0031052	GO:0031052.value > threshold=1.5308658480644226
node_1395: feature_name=hsa05214	hsa05214.value > threshold=1.511171042919159
node_1751: feature_name=GO:0043560	GO:0043560.value <= threshold=1.633065402507782
node_1752: feature_name=GO:0031657	GO:0031657.value <= threshold=1.520110011100769
node_1753: feature_name=GO:0010225	GO:0010225.value <= threshold=3.0487908124923706
node_1754: feature_name=GO:0003266	GO:0003266.value > threshold=1.4739093780517578
Class: HNSC
Rules_118	passed counts:5
node_0: feature_name=GO:0019002	GO:0019002.value <= threshold=0.44260887801647186
node_1: feature_name=GO:0031052	GO:0031052.value > threshold=1.5308658480644226
node_1395: feature_name=hsa05214	hsa05214.value <= threshold=1.511171042919159
node_1396: feature_name=GO:0042772	GO:0042772.value > threshold=1.405928909778595
node_1554: feature_name=GO:0001508	GO:0001508.value <= threshold=1.8742843270301819
node_1555: feature_name=GO:0010484	GO:0010484.value <= threshold=1.9488680958747864
node_1556: feature_name=GO:2000378	GO:2000378.value > threshold=0.9872501492500305
node_1574: feature_name=GO:0007399	GO:0007399.value > threshold=0.16499362885951996
node_1598: feature_name=GO:0046872	GO:0046872.value > threshold=0.3268098682165146
node_1612: feature_name=GO:0010718	GO:0010718.value <= threshold=0.28714585304260254
node_1613: feature_name=w34	w34.value > threshold=-0.05662799999117851
node_1651: feature_name=GO:0018193	GO:0018193.value > threshold=0.2722988724708557
node_1657: feature_name=GO:0006302	GO:0006302.value > threshold=1.8755057454109192
node_1707: feature_name=GO:0048468	GO:0048468.value > threshold=0.5097694545984268
Class: BRCA
Rules_119	passed counts:5
node_0: feature_name=GO:0019002	GO:0019002.value <= threshold=0.44260887801647186
node_1: feature_name=GO:0031052	GO:0031052.value > threshold=1.5308658480644226
node_1395: feature_name=hsa05214	hsa05214.value <= threshold=1.511171042919159
node_1396: feature_name=GO:0042772	GO:0042772.value > threshold=1.405928909778595
node_1554: feature_name=GO:0001508	GO:0001508.value <= threshold=1.8742843270301819
node_1555: feature_name=GO:0010484	GO:0010484.value <= threshold=1.9488680958747864
node_1556: feature_name=GO:2000378	GO:2000378.value > threshold=0.9872501492500305
node_1574: feature_name=GO:0007399	GO:0007399.value > threshold=0.16499362885951996
node_1598: feature_name=GO:0046872	GO:0046872.value > threshold=0.3268098682165146
node_1612: feature_name=GO:0010718	GO:0010718.value <= threshold=0.28714585304260254
node_1613: feature_name=w34	w34.value > threshold=-0.05662799999117851
node_1651: feature_name=GO:0018193	GO:0018193.value > threshold=0.2722988724708557
node_1657: feature_name=GO:0006302	GO:0006302.value <= threshold=1.8755057454109192
node_1658: feature_name=GO:0009611	GO:0009611.value > threshold=0.15191232413053513
node_1662: feature_name=GO:0019899	GO:0019899.value <= threshold=0.9850790798664093
node_1663: feature_name=GO:0044707	GO:0044707.value > threshold=1.8703078031539917
node_1699: feature_name=hsa05215	hsa05215.value <= threshold=1.4998268783092499
Class: COADREAD
Rules_120	passed counts:5
node_0: feature_name=GO:0019002	GO:0019002.value <= threshold=0.44260887801647186
node_1: feature_name=GO:0031052	GO:0031052.value > threshold=1.5308658480644226
node_1395: feature_name=hsa05214	hsa05214.value <= threshold=1.511171042919159
node_1396: feature_name=GO:0042772	GO:0042772.value > threshold=1.405928909778595
node_1554: feature_name=GO:0001508	GO:0001508.value <= threshold=1.8742843270301819
node_1555: feature_name=GO:0010484	GO:0010484.value <= threshold=1.9488680958747864
node_1556: feature_name=GO:2000378	GO:2000378.value > threshold=0.9872501492500305
node_1574: feature_name=GO:0007399	GO:0007399.value > threshold=0.16499362885951996
node_1598: feature_name=GO:0046872	GO:0046872.value > threshold=0.3268098682165146
node_1612: feature_name=GO:0010718	GO:0010718.value <= threshold=0.28714585304260254
node_1613: feature_name=w34	w34.value > threshold=-0.05662799999117851
node_1651: feature_name=GO:0018193	GO:0018193.value > threshold=0.2722988724708557
node_1657: feature_name=GO:0006302	GO:0006302.value <= threshold=1.8755057454109192
node_1658: feature_name=GO:0009611	GO:0009611.value > threshold=0.15191232413053513
node_1662: feature_name=GO:0019899	GO:0019899.value <= threshold=0.9850790798664093
node_1663: feature_name=GO:0044707	GO:0044707.value <= threshold=1.8703078031539917
node_1664: feature_name=GO:0006302	GO:0006302.value > threshold=0.6015291810035706
node_1668: feature_name=GO:0060089	GO:0060089.value <= threshold=0.4789392203092575
node_1669: feature_name=hsa05414	hsa05414.value > threshold=0.3516521453857422
node_1689: feature_name=GO:0045211	GO:0045211.value <= threshold=0.5905308425426483
Class: BRCA
Rules_121	passed counts:5
node_0: feature_name=GO:0019002	GO:0019002.value <= threshold=0.44260887801647186
node_1: feature_name=GO:0031052	GO:0031052.value > threshold=1.5308658480644226
node_1395: feature_name=hsa05214	hsa05214.value <= threshold=1.511171042919159
node_1396: feature_name=GO:0042772	GO:0042772.value > threshold=1.405928909778595
node_1554: feature_name=GO:0001508	GO:0001508.value <= threshold=1.8742843270301819
node_1555: feature_name=GO:0010484	GO:0010484.value <= threshold=1.9488680958747864
node_1556: feature_name=GO:2000378	GO:2000378.value > threshold=0.9872501492500305
node_1574: feature_name=GO:0007399	GO:0007399.value > threshold=0.16499362885951996
node_1598: feature_name=GO:0046872	GO:0046872.value > threshold=0.3268098682165146
node_1612: feature_name=GO:0010718	GO:0010718.value <= threshold=0.28714585304260254
node_1613: feature_name=w34	w34.value > threshold=-0.05662799999117851
node_1651: feature_name=GO:0018193	GO:0018193.value > threshold=0.2722988724708557
node_1657: feature_name=GO:0006302	GO:0006302.value <= threshold=1.8755057454109192
node_1658: feature_name=GO:0009611	GO:0009611.value > threshold=0.15191232413053513
node_1662: feature_name=GO:0019899	GO:0019899.value <= threshold=0.9850790798664093
node_1663: feature_name=GO:0044707	GO:0044707.value <= threshold=1.8703078031539917
node_1664: feature_name=GO:0006302	GO:0006302.value > threshold=0.6015291810035706
node_1668: feature_name=GO:0060089	GO:0060089.value <= threshold=0.4789392203092575
node_1669: feature_name=hsa05414	hsa05414.value <= threshold=0.3516521453857422
node_1670: feature_name=GO:0023052	GO:0023052.value > threshold=0.24069111794233322
node_1676: feature_name=GO:0004888	GO:0004888.value <= threshold=0.19981784373521805
node_1677: feature_name=GO:0003266	GO:0003266.value <= threshold=0.8959019780158997
Class: OV
Rules_122	passed counts:5
node_0: feature_name=GO:0019002	GO:0019002.value <= threshold=0.44260887801647186
node_1: feature_name=GO:0031052	GO:0031052.value > threshold=1.5308658480644226
node_1395: feature_name=hsa05214	hsa05214.value <= threshold=1.511171042919159
node_1396: feature_name=GO:0042772	GO:0042772.value > threshold=1.405928909778595
node_1554: feature_name=GO:0001508	GO:0001508.value <= threshold=1.8742843270301819
node_1555: feature_name=GO:0010484	GO:0010484.value <= threshold=1.9488680958747864
node_1556: feature_name=GO:2000378	GO:2000378.value <= threshold=0.9872501492500305
node_1557: feature_name=w182	w182.value <= threshold=0.2662079930305481
Class: COADREAD
Rules_123	passed counts:5
node_0: feature_name=GO:0019002	GO:0019002.value <= threshold=0.44260887801647186
node_1: feature_name=GO:0031052	GO:0031052.value > threshold=1.5308658480644226
node_1395: feature_name=hsa05214	hsa05214.value <= threshold=1.511171042919159
node_1396: feature_name=GO:0042772	GO:0042772.value <= threshold=1.405928909778595
node_1397: feature_name=GO:0010661	GO:0010661.value > threshold=0.293410062789917
node_1427: feature_name=GO:1900119	GO:1900119.value > threshold=1.3893239498138428
node_1465: feature_name=GO:0042391	GO:0042391.value <= threshold=1.1939783096313477
node_1466: feature_name=GO:0007399	GO:0007399.value > threshold=0.13430748134851456
node_1470: feature_name=GO:0098655	GO:0098655.value <= threshold=0.08384867757558823
node_1471: feature_name=GO:0000904	GO:0000904.value <= threshold=1.0061696767807007
node_1472: feature_name=GO:0097458	GO:0097458.value <= threshold=0.3555719405412674
node_1473: feature_name=GO:0045202	GO:0045202.value > threshold=0.13519750908017159
node_1479: feature_name=GO:0030182	GO:0030182.value > threshold=0.12143038865178823
Class: OV
Rules_124	passed counts:5
node_0: feature_name=GO:0019002	GO:0019002.value <= threshold=0.44260887801647186
node_1: feature_name=GO:0031052	GO:0031052.value <= threshold=1.5308658480644226
node_2: feature_name=GO:0044028	GO:0044028.value <= threshold=2.612712264060974
node_3: feature_name=GO:0061428	GO:0061428.value <= threshold=1.6541950702667236
node_4: feature_name=hsa05210	hsa05210.value > threshold=0.010015622712671757
node_842: feature_name=GO:0051717	GO:0051717.value <= threshold=0.5213537216186523
node_843: feature_name=hsa04740	hsa04740.value > threshold=0.4976523220539093
node_1195: feature_name=hsa05210	hsa05210.value > threshold=0.4788101613521576
node_1237: feature_name=GO:0005218	GO:0005218.value > threshold=0.7114565074443817
node_1295: feature_name=GO:0031294	GO:0031294.value <= threshold=0.4541195034980774
node_1296: feature_name=GO:0060571	GO:0060571.value > threshold=0.1679871380329132
node_1314: feature_name=GO:2000811	GO:2000811.value > threshold=0.43714772164821625
node_1318: feature_name=GO:0048667	GO:0048667.value <= threshold=3.5675381422042847
Class: LUSC
Rules_125	passed counts:5
node_0: feature_name=GO:0019002	GO:0019002.value <= threshold=0.44260887801647186
node_1: feature_name=GO:0031052	GO:0031052.value <= threshold=1.5308658480644226
node_2: feature_name=GO:0044028	GO:0044028.value <= threshold=2.612712264060974
node_3: feature_name=GO:0061428	GO:0061428.value <= threshold=1.6541950702667236
node_4: feature_name=hsa05210	hsa05210.value > threshold=0.010015622712671757
node_842: feature_name=GO:0051717	GO:0051717.value <= threshold=0.5213537216186523
node_843: feature_name=hsa04740	hsa04740.value > threshold=0.4976523220539093
node_1195: feature_name=hsa05210	hsa05210.value > threshold=0.4788101613521576
node_1237: feature_name=GO:0005218	GO:0005218.value <= threshold=0.7114565074443817
node_1238: feature_name=GO:0007606	GO:0007606.value <= threshold=1.7004631757736206
node_1239: feature_name=GO:0006734	GO:0006734.value <= threshold=0.3861302584409714
node_1240: feature_name=GO:0051703	GO:0051703.value > threshold=0.8428163230419159
node_1274: feature_name=GO:0046872	GO:0046872.value <= threshold=1.3213812112808228
Class: GBM
Rules_126	passed counts:5
node_0: feature_name=GO:0019002	GO:0019002.value <= threshold=0.44260887801647186
node_1: feature_name=GO:0031052	GO:0031052.value <= threshold=1.5308658480644226
node_2: feature_name=GO:0044028	GO:0044028.value <= threshold=2.612712264060974
node_3: feature_name=GO:0061428	GO:0061428.value <= threshold=1.6541950702667236
node_4: feature_name=hsa05210	hsa05210.value > threshold=0.010015622712671757
[truncated: 15,555 more rows]

## Sheet: Rules on MCFS feature list
Rules_0	passed counts:144
node_0: feature_name=hsa05216	hsa05216.value > threshold=0.008738384582102299
node_1064: feature_name=hsa05211	hsa05211.value > threshold=0.01115855760872364
node_1478: feature_name=hsa04730	hsa04730.value > threshold=0.4203944057226181
node_1668: feature_name=hsa04740	hsa04740.value <= threshold=1.529222011566162
node_1669: feature_name=n462	n462.value <= threshold=0.04168100096285343
node_1670: feature_name=hsa04320	hsa04320.value > threshold=0.7822191715240479
node_1742: feature_name=hsa00562	hsa00562.value <= threshold=1.9364370703697205
node_1743: feature_name=hsa05230	hsa05230.value > threshold=0.6107595264911652
node_1753: feature_name=hsa04213	hsa04213.value > threshold=0.1056622862815857
node_1763: feature_name=w42	w42.value > threshold=0.2646230012178421
node_1771: feature_name=n419	n419.value > threshold=-0.05169899947941303
node_1775: feature_name=w156	w156.value <= threshold=-0.16211050003767014
node_1776: feature_name=n265	n265.value > threshold=-0.020761500112712383
node_1782: feature_name=hsa04210	hsa04210.value > threshold=0.2996743619441986
node_1786: feature_name=n192	n192.value > threshold=0.0018289999570697546
node_1788: feature_name=w51	w51.value <= threshold=-0.19115000218153
node_1789: feature_name=hsa04726	hsa04726.value > threshold=0.19957439601421356
node_1791: feature_name=hsa05130	hsa05130.value <= threshold=1.8887968063354492
node_1792: feature_name=n378	n378.value <= threshold=-0.02360650058835745
Class: COADREAD
Rules_1	passed counts:117
node_0: feature_name=hsa05216	hsa05216.value > threshold=0.008738384582102299
node_1064: feature_name=hsa05211	hsa05211.value <= threshold=0.01115855760872364
node_1065: feature_name=w39	w39.value <= threshold=-0.04286150075495243
node_1066: feature_name=hsa05216	hsa05216.value > threshold=0.99088454246521
node_1098: feature_name=n282	n282.value <= threshold=0.03852050006389618
node_1099: feature_name=hsa05212	hsa05212.value > threshold=0.8910437226295471
node_1183: feature_name=hsa05218	hsa05218.value <= threshold=1.8006192445755005
node_1184: feature_name=n133	n133.value <= threshold=-0.03374200128018856
node_1185: feature_name=w148	w148.value > threshold=-0.03721199929714203
node_1205: feature_name=n264	n264.value > threshold=0.024240000173449516
node_1211: feature_name=n272	n272.value > threshold=0.03983650170266628
node_1215: feature_name=hsa04071	hsa04071.value > threshold=0.4727238118648529
node_1225: feature_name=n147	n147.value <= threshold=-0.03321300074458122
node_1226: feature_name=n428	n428.value > threshold=0.06328549981117249
node_1228: feature_name=n461	n461.value > threshold=0.05480250157415867
node_1236: feature_name=w37	w37.value > threshold=0.11638299748301506
node_1240: feature_name=w98	w98.value > threshold=0.2108355015516281
node_1244: feature_name=hsa05414	hsa05414.value <= threshold=2.9225293397903442
node_1245: feature_name=hsa05200	hsa05200.value > threshold=0.28433698415756226
node_1251: feature_name=n68	n68.value > threshold=-0.12713950127363205
node_1253: feature_name=hsa04022	hsa04022.value <= threshold=2.6120225191116333
node_1254: feature_name=w124	w124.value > threshold=0.004705999977886677
node_1256: feature_name=n378	n378.value > threshold=-0.08607399836182594
node_1258: feature_name=n488	n488.value > threshold=-0.0482184998691082
node_1260: feature_name=w234	w234.value > threshold=0.040729500353336334
node_1262: feature_name=w10	w10.value <= threshold=0.06938150152564049
Class: OV
Rules_2	passed counts:102
node_0: feature_name=hsa05216	hsa05216.value <= threshold=0.008738384582102299
node_1: feature_name=hsa04960	hsa04960.value > threshold=1.185187578201294
node_1001: feature_name=hsa05210	hsa05210.value > threshold=0.9842148423194885
node_1035: feature_name=w160	w160.value <= threshold=-0.029362499713897705
node_1036: feature_name=w189	w189.value <= threshold=0.17145299911499023
node_1037: feature_name=w5	w5.value <= threshold=0.12263749912381172
node_1038: feature_name=hsa04014	hsa04014.value > threshold=0.40501822531223297
node_1040: feature_name=n192	n192.value > threshold=-0.009014500072225928
node_1042: feature_name=hsa05214	hsa05214.value <= threshold=3.630691647529602
node_1043: feature_name=hsa00562	hsa00562.value > threshold=0.43969592452049255
Class: BRCA
Rules_3	passed counts:80
node_0: feature_name=hsa05216	hsa05216.value <= threshold=0.008738384582102299
node_1: feature_name=hsa04960	hsa04960.value <= threshold=1.185187578201294
node_2: feature_name=n361	n361.value <= threshold=0.009753999765962362
node_3: feature_name=w165	w165.value <= threshold=-0.04168100096285343
node_4: feature_name=hsa05211	hsa05211.value > threshold=0.6950022280216217
node_266: feature_name=hsa05212	hsa05212.value <= threshold=0.7019358277320862
node_267: feature_name=w145	w145.value <= threshold=-0.09962650015950203
node_268: feature_name=n102	n102.value > threshold=0.045843999832868576
node_272: feature_name=hsa04068	hsa04068.value <= threshold=2.876082181930542
node_273: feature_name=n248	n248.value <= threshold=0.019457499496638775
node_274: feature_name=w221	w221.value > threshold=0.20353499799966812
Class: KIRC
Rules_4	passed counts:70
node_0: feature_name=hsa05216	hsa05216.value <= threshold=0.008738384582102299
node_1: feature_name=hsa04960	hsa04960.value <= threshold=1.185187578201294
node_2: feature_name=n361	n361.value <= threshold=0.009753999765962362
node_3: feature_name=w165	w165.value <= threshold=-0.04168100096285343
node_4: feature_name=hsa05211	hsa05211.value <= threshold=0.6950022280216217
node_5: feature_name=hsa05221	hsa05221.value <= threshold=1.1011908054351807
node_6: feature_name=n112	n112.value <= threshold=0.05051000043749809
node_7: feature_name=hsa00562	hsa00562.value <= threshold=0.05919164419174194
node_8: feature_name=n236	n236.value <= threshold=0.013442500028759241
node_9: feature_name=n465	n465.value <= threshold=0.0699944980442524
node_10: feature_name=n212	n212.value <= threshold=0.025276999920606613
node_11: feature_name=n13	n13.value <= threshold=0.04890100099146366
node_12: feature_name=n413	n413.value <= threshold=-0.05739950016140938
node_13: feature_name=n397	n397.value > threshold=-0.10589800029993057
node_17: feature_name=hsa04530	hsa04530.value <= threshold=0.8452291786670685
node_18: feature_name=n203	n203.value <= threshold=-0.04892349988222122
node_19: feature_name=hsa05130	hsa05130.value <= threshold=1.0053118169307709
node_20: feature_name=n1	n1.value > threshold=0.035066500306129456
node_32: feature_name=w233	w233.value > threshold=0.029866999946534634
node_36: feature_name=n134	n134.value > threshold=-0.045159999281167984
node_40: feature_name=w1	w1.value <= threshold=0.08820749819278717
node_41: feature_name=n239	n239.value <= threshold=0.012733499985188246
node_42: feature_name=n330	n330.value > threshold=0.005186000082176179
node_44: feature_name=n121	n121.value <= threshold=0.034997498616576195
node_45: feature_name=n455	n455.value <= threshold=0.04354050010442734
node_46: feature_name=hsa05218	hsa05218.value <= threshold=0.868075430393219
Class: KIRC
Rules_5	passed counts:42
node_0: feature_name=hsa05216	hsa05216.value > threshold=0.008738384582102299
node_1064: feature_name=hsa05211	hsa05211.value <= threshold=0.01115855760872364
node_1065: feature_name=w39	w39.value <= threshold=-0.04286150075495243
node_1066: feature_name=hsa05216	hsa05216.value > threshold=0.99088454246521
node_1098: feature_name=n282	n282.value <= threshold=0.03852050006389618
node_1099: feature_name=hsa05212	hsa05212.value <= threshold=0.8910437226295471
node_1100: feature_name=n72	n72.value > threshold=0.015576499979943037
node_1110: feature_name=n197	n197.value <= threshold=0.02619349956512451
node_1111: feature_name=hsa05223	hsa05223.value > threshold=0.5584004521369934
node_1119: feature_name=hsa05222	hsa05222.value > threshold=0.5847902297973633
node_1121: feature_name=w253	w253.value > threshold=-0.3063270002603531
node_1133: feature_name=w97	w97.value > threshold=-0.02251149993389845
node_1137: feature_name=n60	n60.value <= threshold=0.1670914962887764
node_1138: feature_name=n102	n102.value <= threshold=0.07643600180745125
node_1139: feature_name=w135	w135.value > threshold=-0.08926200121641159
node_1145: feature_name=w135	w135.value <= threshold=-0.04747599922120571
node_1146: feature_name=hsa05218	hsa05218.value <= threshold=1.4766904711723328
node_1147: feature_name=hsa04919	hsa04919.value > threshold=0.4754810780286789
node_1149: feature_name=n103	n103.value <= threshold=-0.06805050000548363
node_1150: feature_name=n302	n302.value <= threshold=0.04327800124883652
Class: OV
Rules_6	passed counts:41
node_0: feature_name=hsa05216	hsa05216.value > threshold=0.008738384582102299
node_1064: feature_name=hsa05211	hsa05211.value > threshold=0.01115855760872364
node_1478: feature_name=hsa04730	hsa04730.value > threshold=0.4203944057226181
node_1668: feature_name=hsa04740	hsa04740.value <= threshold=1.529222011566162
node_1669: feature_name=n462	n462.value <= threshold=0.04168100096285343
node_1670: feature_name=hsa04320	hsa04320.value <= threshold=0.7822191715240479
node_1671: feature_name=n263	n263.value > threshold=-0.09555699676275253
node_1703: feature_name=n120	n120.value <= threshold=-0.06260449811816216
node_1704: feature_name=n120	n120.value > threshold=-0.07581949979066849
node_1716: feature_name=n295	n295.value > threshold=0.06736699864268303
node_1722: feature_name=n356	n356.value > threshold=-0.030515999533236027
node_1724: feature_name=n223	n223.value > threshold=0.011163499671965837
Class: COADREAD
Rules_7	passed counts:40
node_0: feature_name=hsa05216	hsa05216.value > threshold=0.008738384582102299
node_1064: feature_name=hsa05211	hsa05211.value > threshold=0.01115855760872364
node_1478: feature_name=hsa04730	hsa04730.value > threshold=0.4203944057226181
node_1668: feature_name=hsa04740	hsa04740.value > threshold=1.529222011566162
node_1952: feature_name=n326	n326.value <= threshold=0.04410549998283386
node_1953: feature_name=n141	n141.value > threshold=0.03825649991631508
node_1959: feature_name=n9	n9.value <= threshold=-0.04042050056159496
node_1960: feature_name=w48	w48.value > threshold=0.006778000155463815
node_1962: feature_name=n251	n251.value > threshold=-0.07094400003552437
node_1968: feature_name=hsa05212	hsa05212.value > threshold=0.019075434654951096
Class: LUAD
Rules_8	passed counts:35
node_0: feature_name=hsa05216	hsa05216.value > threshold=0.008738384582102299
node_1064: feature_name=hsa05211	hsa05211.value > threshold=0.01115855760872364
node_1478: feature_name=hsa04730	hsa04730.value <= threshold=0.4203944057226181
node_1479: feature_name=hsa04150	hsa04150.value > threshold=0.8959079086780548
node_1619: feature_name=hsa05130	hsa05130.value > threshold=0.07932376489043236
node_1655: feature_name=w190	w190.value > threshold=0.36073100566864014
node_1661: feature_name=n270	n270.value > threshold=0.10439350083470345
node_1665: feature_name=hsa05100	hsa05100.value > threshold=0.3925027996301651
Class: UCEC
Rules_9	passed counts:33
node_0: feature_name=hsa05216	hsa05216.value <= threshold=0.008738384582102299
node_1: feature_name=hsa04960	hsa04960.value <= threshold=1.185187578201294
node_2: feature_name=n361	n361.value <= threshold=0.009753999765962362
node_3: feature_name=w165	w165.value > threshold=-0.04168100096285343
node_307: feature_name=w171	w171.value <= threshold=-0.037789998576045036
node_308: feature_name=hsa05166	hsa05166.value <= threshold=0.9234459102153778
Class: LAML
Rules_10	passed counts:31
node_0: feature_name=hsa05216	hsa05216.value > threshold=0.008738384582102299
node_1064: feature_name=hsa05211	hsa05211.value > threshold=0.01115855760872364
node_1478: feature_name=hsa04730	hsa04730.value > threshold=0.4203944057226181
node_1668: feature_name=hsa04740	hsa04740.value <= threshold=1.529222011566162
node_1669: feature_name=n462	n462.value > threshold=0.04168100096285343
node_1801: feature_name=w59	w59.value > threshold=0.1346680000424385
node_1805: feature_name=hsa00562	hsa00562.value <= threshold=0.7899944186210632
node_1806: feature_name=hsa05213	hsa05213.value > threshold=1.5140634179115295
node_1880: feature_name=hsa04550	hsa04550.value > threshold=0.35046570003032684
node_1888: feature_name=n97	n97.value <= threshold=-0.028852000832557678
node_1889: feature_name=w253	w253.value <= threshold=-0.2559240013360977
node_1890: feature_name=n203	n203.value > threshold=-0.07018199935555458
node_1894: feature_name=w22	w22.value <= threshold=-0.04971499927341938
node_1895: feature_name=w153	w153.value <= threshold=0.06580650061368942
Class: COADREAD
Rules_11	passed counts:29
node_0: feature_name=hsa05216	hsa05216.value <= threshold=0.008738384582102299
node_1: feature_name=hsa04960	hsa04960.value <= threshold=1.185187578201294
node_2: feature_name=n361	n361.value <= threshold=0.009753999765962362
node_3: feature_name=w165	w165.value <= threshold=-0.04168100096285343
node_4: feature_name=hsa05211	hsa05211.value <= threshold=0.6950022280216217
node_5: feature_name=hsa05221	hsa05221.value <= threshold=1.1011908054351807
node_6: feature_name=n112	n112.value <= threshold=0.05051000043749809
node_7: feature_name=hsa00562	hsa00562.value <= threshold=0.05919164419174194
node_8: feature_name=n236	n236.value <= threshold=0.013442500028759241
node_9: feature_name=n465	n465.value <= threshold=0.0699944980442524
node_10: feature_name=n212	n212.value <= threshold=0.025276999920606613
node_11: feature_name=n13	n13.value <= threshold=0.04890100099146366
node_12: feature_name=n413	n413.value > threshold=-0.05739950016140938
node_80: feature_name=w41	w41.value > threshold=-0.12907050549983978
node_108: feature_name=n171	n171.value > threshold=0.030950999818742275
node_124: feature_name=w67	w67.value > threshold=0.04223550111055374
node_126: feature_name=hsa05034	hsa05034.value <= threshold=0.6058051884174347
node_127: feature_name=w97	w97.value <= threshold=0.019892499782145023
node_128: feature_name=w37	w37.value <= threshold=0.1952509954571724
node_129: feature_name=w126	w126.value > threshold=-0.19639550149440765
node_131: feature_name=hsa04923	hsa04923.value <= threshold=1.533176302909851
Class: KIRC
Rules_12	passed counts:27
node_0: feature_name=hsa05216	hsa05216.value <= threshold=0.008738384582102299
node_1: feature_name=hsa04960	hsa04960.value <= threshold=1.185187578201294
node_2: feature_name=n361	n361.value > threshold=0.009753999765962362
node_328: feature_name=n466	n466.value <= threshold=-0.05319850146770477
node_329: feature_name=hsa04261	hsa04261.value <= threshold=0.015952877700328827
node_330: feature_name=hsa05218	hsa05218.value > threshold=0.6024213135242462
node_618: feature_name=hsa05200	hsa05200.value <= threshold=0.6692508459091187
node_619: feature_name=n473	n473.value > threshold=-0.06016650050878525
node_627: feature_name=hsa04510	hsa04510.value > threshold=0.1710038036108017
Class: GBM
Rules_13	passed counts:26
node_0: feature_name=hsa05216	hsa05216.value <= threshold=0.008738384582102299
node_1: feature_name=hsa04960	hsa04960.value <= threshold=1.185187578201294
node_2: feature_name=n361	n361.value > threshold=0.009753999765962362
node_328: feature_name=n466	n466.value > threshold=-0.05319850146770477
node_978: feature_name=w67	w67.value <= threshold=0.1403224989771843
node_979: feature_name=hsa05212	hsa05212.value <= threshold=0.42597439885139465
node_980: feature_name=w10	w10.value > threshold=0.010047999676316977
Class: LAML
Rules_14	passed counts:26
node_0: feature_name=hsa05216	hsa05216.value <= threshold=0.008738384582102299
node_1: feature_name=hsa04960	hsa04960.value <= threshold=1.185187578201294
node_2: feature_name=n361	n361.value > threshold=0.009753999765962362
node_328: feature_name=n466	n466.value <= threshold=-0.05319850146770477
node_329: feature_name=hsa04261	hsa04261.value <= threshold=0.015952877700328827
node_330: feature_name=hsa05218	hsa05218.value <= threshold=0.6024213135242462
node_331: feature_name=hsa05211	hsa05211.value > threshold=0.6050123870372772
node_595: feature_name=w226	w226.value > threshold=0.0033855000510811806
node_609: feature_name=w177	w177.value <= threshold=0.1454400047659874
node_610: feature_name=n244	n244.value > threshold=0.03966649994254112
node_614: feature_name=hsa05203	hsa05203.value <= threshold=0.9703008234500885
Class: KIRC
Rules_15	passed counts:24
node_0: feature_name=hsa05216	hsa05216.value > threshold=0.008738384582102299
node_1064: feature_name=hsa05211	hsa05211.value > threshold=0.01115855760872364
node_1478: feature_name=hsa04730	hsa04730.value > threshold=0.4203944057226181
node_1668: feature_name=hsa04740	hsa04740.value <= threshold=1.529222011566162
node_1669: feature_name=n462	n462.value > threshold=0.04168100096285343
node_1801: feature_name=w59	w59.value > threshold=0.1346680000424385
node_1805: feature_name=hsa00562	hsa00562.value > threshold=0.7899944186210632
node_1903: feature_name=n447	n447.value <= threshold=-0.0701340027153492
node_1904: feature_name=w198	w198.value <= threshold=-0.045126501470804214
node_1905: feature_name=hsa04630	hsa04630.value <= threshold=1.2875046730041504
node_1906: feature_name=n182	n182.value > threshold=-0.010083000175654888
Class: UCEC
Rules_16	passed counts:23
node_0: feature_name=hsa05216	hsa05216.value <= threshold=0.008738384582102299
node_1: feature_name=hsa04960	hsa04960.value <= threshold=1.185187578201294
node_2: feature_name=n361	n361.value > threshold=0.009753999765962362
node_328: feature_name=n466	n466.value <= threshold=-0.05319850146770477
node_329: feature_name=hsa04261	hsa04261.value <= threshold=0.015952877700328827
node_330: feature_name=hsa05218	hsa05218.value <= threshold=0.6024213135242462
node_331: feature_name=hsa05211	hsa05211.value <= threshold=0.6050123870372772
node_332: feature_name=hsa03440	hsa03440.value <= threshold=0.826141357421875
node_333: feature_name=w78	w78.value > threshold=0.26707249879837036
node_495: feature_name=n299	n299.value <= threshold=-0.09224249795079231
node_496: feature_name=w214	w214.value <= threshold=0.14825550466775894
node_497: feature_name=w1	w1.value > threshold=0.051901498809456825
node_517: feature_name=hsa04320	hsa04320.value <= threshold=0.4051239788532257
node_518: feature_name=w145	w145.value <= threshold=-0.08544100075960159
Class: BRCA
Rules_17	passed counts:22
node_0: feature_name=hsa05216	hsa05216.value > threshold=0.008738384582102299
node_1064: feature_name=hsa05211	hsa05211.value <= threshold=0.01115855760872364
node_1065: feature_name=w39	w39.value > threshold=-0.04286150075495243
node_1305: feature_name=hsa05216	hsa05216.value <= threshold=0.7611925005912781
node_1306: feature_name=n132	n132.value <= threshold=-0.013973000459372997
node_1307: feature_name=hsa05203	hsa05203.value > threshold=0.1719512641429901
node_1319: feature_name=hsa05161	hsa05161.value > threshold=0.04577249940484762
Class: LUSC
Rules_18	passed counts:21
node_0: feature_name=hsa05216	hsa05216.value <= threshold=0.008738384582102299
node_1: feature_name=hsa04960	hsa04960.value <= threshold=1.185187578201294
node_2: feature_name=n361	n361.value > threshold=0.009753999765962362
node_328: feature_name=n466	n466.value <= threshold=-0.05319850146770477
node_329: feature_name=hsa04261	hsa04261.value <= threshold=0.015952877700328827
node_330: feature_name=hsa05218	hsa05218.value <= threshold=0.6024213135242462
node_331: feature_name=hsa05211	hsa05211.value <= threshold=0.6050123870372772
node_332: feature_name=hsa03440	hsa03440.value <= threshold=0.826141357421875
node_333: feature_name=w78	w78.value <= threshold=0.26707249879837036
node_334: feature_name=n89	n89.value <= threshold=0.03955399990081787
node_335: feature_name=n379	n379.value <= threshold=-0.013270499650388956
node_336: feature_name=n105	n105.value > threshold=-0.009290999732911587
node_436: feature_name=w60	w60.value <= threshold=-0.10628599673509598
node_437: feature_name=n437	n437.value <= threshold=0.048174500465393066
Class: KIRC
Rules_19	passed counts:20
node_0: feature_name=hsa05216	hsa05216.value > threshold=0.008738384582102299
node_1064: feature_name=hsa05211	hsa05211.value > threshold=0.01115855760872364
node_1478: feature_name=hsa04730	hsa04730.value > threshold=0.4203944057226181
node_1668: feature_name=hsa04740	hsa04740.value <= threshold=1.529222011566162
node_1669: feature_name=n462	n462.value > threshold=0.04168100096285343
node_1801: feature_name=w59	w59.value > threshold=0.1346680000424385
node_1805: feature_name=hsa00562	hsa00562.value <= threshold=0.7899944186210632
node_1806: feature_name=hsa05213	hsa05213.value <= threshold=1.5140634179115295
node_1807: feature_name=n115	n115.value > threshold=0.020373000763356686
node_1819: feature_name=hsa04360	hsa04360.value > threshold=0.9092052578926086
node_1861: feature_name=n128	n128.value > threshold=0.041934000328183174
node_1869: feature_name=w182	w182.value > threshold=0.26110200583934784
node_1875: feature_name=n12	n12.value > threshold=-0.03520449995994568
Class: COADREAD
Rules_20	passed counts:19
node_0: feature_name=hsa05216	hsa05216.value <= threshold=0.008738384582102299
node_1: feature_name=hsa04960	hsa04960.value <= threshold=1.185187578201294
node_2: feature_name=n361	n361.value > threshold=0.009753999765962362
node_328: feature_name=n466	n466.value <= threshold=-0.05319850146770477
node_329: feature_name=hsa04261	hsa04261.value <= threshold=0.015952877700328827
node_330: feature_name=hsa05218	hsa05218.value <= threshold=0.6024213135242462
node_331: feature_name=hsa05211	hsa05211.value <= threshold=0.6050123870372772
node_332: feature_name=hsa03440	hsa03440.value <= threshold=0.826141357421875
node_333: feature_name=w78	w78.value > threshold=0.26707249879837036
node_495: feature_name=n299	n299.value > threshold=-0.09224249795079231
node_529: feature_name=n328	n328.value <= threshold=-0.027710000053048134
node_530: feature_name=n465	n465.value <= threshold=0.07783699780702591
node_531: feature_name=hsa05206	hsa05206.value <= threshold=0.3189053237438202
node_532: feature_name=n243	n243.value <= threshold=0.02507700026035309
node_533: feature_name=w174	w174.value > threshold=0.26925499737262726
Class: LAML
Rules_21	passed counts:17
node_0: feature_name=hsa05216	hsa05216.value <= threshold=0.008738384582102299
node_1: feature_name=hsa04960	hsa04960.value <= threshold=1.185187578201294
node_2: feature_name=n361	n361.value > threshold=0.009753999765962362
node_328: feature_name=n466	n466.value <= threshold=-0.05319850146770477
node_329: feature_name=hsa04261	hsa04261.value <= threshold=0.015952877700328827
node_330: feature_name=hsa05218	hsa05218.value <= threshold=0.6024213135242462
node_331: feature_name=hsa05211	hsa05211.value <= threshold=0.6050123870372772
node_332: feature_name=hsa03440	hsa03440.value > threshold=0.826141357421875
node_566: feature_name=n106	n106.value <= threshold=-0.027768499217927456
node_567: feature_name=w177	w177.value <= threshold=0.11051600053906441
node_568: feature_name=n458	n458.value > threshold=-0.009758500382304192
Class: OV
Rules_22	passed counts:16
node_0: feature_name=hsa05216	hsa05216.value <= threshold=0.008738384582102299
node_1: feature_name=hsa04960	hsa04960.value <= threshold=1.185187578201294
node_2: feature_name=n361	n361.value > threshold=0.009753999765962362
node_328: feature_name=n466	n466.value <= threshold=-0.05319850146770477
node_329: feature_name=hsa04261	hsa04261.value > threshold=0.015952877700328827
node_659: feature_name=hsa04740	hsa04740.value > threshold=1.3273355960845947
node_947: feature_name=hsa04930	hsa04930.value > threshold=0.46177762746810913
node_963: feature_name=w245	w245.value > threshold=-0.13261599838733673
node_975: feature_name=n412	n412.value > threshold=-0.06176350079476833
Class: LUSC
Rules_23	passed counts:16
node_0: feature_name=hsa05216	hsa05216.value <= threshold=0.008738384582102299
node_1: feature_name=hsa04960	hsa04960.value <= threshold=1.185187578201294
node_2: feature_name=n361	n361.value > threshold=0.009753999765962362
node_328: feature_name=n466	n466.value <= threshold=-0.05319850146770477
node_329: feature_name=hsa04261	hsa04261.value <= threshold=0.015952877700328827
node_330: feature_name=hsa05218	hsa05218.value <= threshold=0.6024213135242462
node_331: feature_name=hsa05211	hsa05211.value <= threshold=0.6050123870372772
node_332: feature_name=hsa03440	hsa03440.value <= threshold=0.826141357421875
node_333: feature_name=w78	w78.value <= threshold=0.26707249879837036
node_334: feature_name=n89	n89.value > threshold=0.03955399990081787
node_452: feature_name=n102	n102.value <= threshold=0.06385499984025955
node_453: feature_name=n68	n68.value <= threshold=-0.11220549792051315
node_454: feature_name=n475	n475.value > threshold=0.08169599995017052
node_456: feature_name=n240	n240.value > threshold=-0.00794150005094707
node_458: feature_name=n210	n210.value > threshold=0.03823400102555752
node_466: feature_name=n345	n345.value <= threshold=0.05679699964821339
Class: GBM
Rules_24	passed counts:15
node_0: feature_name=hsa05216	hsa05216.value > threshold=0.008738384582102299
node_1064: feature_name=hsa05211	hsa05211.value > threshold=0.01115855760872364
node_1478: feature_name=hsa04730	hsa04730.value > threshold=0.4203944057226181
node_1668: feature_name=hsa04740	hsa04740.value <= threshold=1.529222011566162
node_1669: feature_name=n462	n462.value > threshold=0.04168100096285343
node_1801: feature_name=w59	w59.value <= threshold=0.1346680000424385
node_1802: feature_name=w12	w12.value <= threshold=-0.16688650101423264
Class: LAML
Rules_25	passed counts:15
node_0: feature_name=hsa05216	hsa05216.value > threshold=0.008738384582102299
node_1064: feature_name=hsa05211	hsa05211.value > threshold=0.01115855760872364
node_1478: feature_name=hsa04730	hsa04730.value <= threshold=0.4203944057226181
node_1479: feature_name=hsa04150	hsa04150.value <= threshold=0.8959079086780548
node_1480: feature_name=hsa04740	hsa04740.value > threshold=0.8457262516021729
node_1594: feature_name=w37	w37.value > threshold=0.1235475018620491
node_1604: feature_name=hsa04066	hsa04066.value <= threshold=0.37814486026763916
node_1605: feature_name=n44	n44.value > threshold=0.024834999814629555
Class: LUSC
Rules_26	passed counts:15
node_0: feature_name=hsa05216	hsa05216.value <= threshold=0.008738384582102299
node_1: feature_name=hsa04960	hsa04960.value <= threshold=1.185187578201294
node_2: feature_name=n361	n361.value > threshold=0.009753999765962362
node_328: feature_name=n466	n466.value <= threshold=-0.05319850146770477
node_329: feature_name=hsa04261	hsa04261.value > threshold=0.015952877700328827
node_659: feature_name=hsa04740	hsa04740.value <= threshold=1.3273355960845947
node_660: feature_name=n462	n462.value <= threshold=0.03411350026726723
node_661: feature_name=n312	n312.value > threshold=0.04324200004339218
node_763: feature_name=hsa04921	hsa04921.value > threshold=0.5790568590164185
Class: GBM
Rules_27	passed counts:15
node_0: feature_name=hsa05216	hsa05216.value <= threshold=0.008738384582102299
node_1: feature_name=hsa04960	hsa04960.value <= threshold=1.185187578201294
node_2: feature_name=n361	n361.value > threshold=0.009753999765962362
node_328: feature_name=n466	n466.value <= threshold=-0.05319850146770477
node_329: feature_name=hsa04261	hsa04261.value > threshold=0.015952877700328827
node_659: feature_name=hsa04740	hsa04740.value <= threshold=1.3273355960845947
node_660: feature_name=n462	n462.value <= threshold=0.03411350026726723
node_661: feature_name=n312	n312.value <= threshold=0.04324200004339218
node_662: feature_name=n216	n216.value > threshold=-0.020075999200344086
node_676: feature_name=n56	n56.value > threshold=-0.06908449903130531
node_678: feature_name=hsa04921	hsa04921.value <= threshold=0.42061077058315277
node_679: feature_name=n192	n192.value <= threshold=0.022944499738514423
node_680: feature_name=w108	w108.value > threshold=0.3202359974384308
node_688: feature_name=n234	n234.value > threshold=0.05039399862289429
node_690: feature_name=n212	n212.value <= threshold=-0.011497500352561474
Class: COADREAD
Rules_28	passed counts:15
node_0: feature_name=hsa05216	hsa05216.value <= threshold=0.008738384582102299
node_1: feature_name=hsa04960	hsa04960.value <= threshold=1.185187578201294
node_2: feature_name=n361	n361.value > threshold=0.009753999765962362
node_328: feature_name=n466	n466.value <= threshold=-0.05319850146770477
node_329: feature_name=hsa04261	hsa04261.value > threshold=0.015952877700328827
node_659: feature_name=hsa04740	hsa04740.value <= threshold=1.3273355960845947
node_660: feature_name=n462	n462.value <= threshold=0.03411350026726723
node_661: feature_name=n312	n312.value <= threshold=0.04324200004339218
node_662: feature_name=n216	n216.value <= threshold=-0.020075999200344086
node_663: feature_name=n201	n201.value <= threshold=-0.0005639999872073531
node_664: feature_name=n186	n186.value <= threshold=0.011578999925404787
node_665: feature_name=n72	n72.value > threshold=0.01682449970394373
Class: GBM
Rules_29	passed counts:14
node_0: feature_name=hsa05216	hsa05216.value > threshold=0.008738384582102299
node_1064: feature_name=hsa05211	hsa05211.value > threshold=0.01115855760872364
node_1478: feature_name=hsa04730	hsa04730.value <= threshold=0.4203944057226181
node_1479: feature_name=hsa04150	hsa04150.value <= threshold=0.8959079086780548
node_1480: feature_name=hsa04740	hsa04740.value > threshold=0.8457262516021729
node_1594: feature_name=w37	w37.value <= threshold=0.1235475018620491
node_1595: feature_name=n396	n396.value <= threshold=0.002315000048838556
node_1596: feature_name=w44	w44.value <= threshold=-0.2534260004758835
Class: LUAD
Rules_30	passed counts:14
node_0: feature_name=hsa05216	hsa05216.value > threshold=0.008738384582102299
node_1064: feature_name=hsa05211	hsa05211.value <= threshold=0.01115855760872364
node_1065: feature_name=w39	w39.value > threshold=-0.04286150075495243
node_1305: feature_name=hsa05216	hsa05216.value > threshold=0.7611925005912781
node_1335: feature_name=w232	w232.value > threshold=-0.12021699920296669
node_1343: feature_name=hsa05218	hsa05218.value <= threshold=1.6813135147094727
node_1344: feature_name=hsa05210	hsa05210.value > threshold=0.5064268708229065
node_1376: feature_name=n6	n6.value <= threshold=0.045470500364899635
node_1377: feature_name=n53	n53.value > threshold=-0.03459149971604347
node_1407: feature_name=hsa04310	hsa04310.value <= threshold=0.3557337373495102
node_1408: feature_name=n272	n272.value > threshold=0.0596110001206398
Class: HNSC
Rules_31	passed counts:14
node_0: feature_name=hsa05216	hsa05216.value <= threshold=0.008738384582102299
node_1: feature_name=hsa04960	hsa04960.value <= threshold=1.185187578201294
node_2: feature_name=n361	n361.value > threshold=0.009753999765962362
node_328: feature_name=n466	n466.value <= threshold=-0.05319850146770477
node_329: feature_name=hsa04261	hsa04261.value > threshold=0.015952877700328827
node_659: feature_name=hsa04740	hsa04740.value <= threshold=1.3273355960845947
node_660: feature_name=n462	n462.value > threshold=0.03411350026726723
node_774: feature_name=hsa05100	hsa05100.value <= threshold=1.0211573839187622
node_775: feature_name=hsa04620	hsa04620.value <= threshold=0.534568190574646
node_776: feature_name=n29	n29.value > threshold=0.03420750051736832
node_780: feature_name=n171	n171.value > threshold=0.0236395001411438
node_784: feature_name=n192	n192.value > threshold=0.007774000288918614
node_792: feature_name=n66	n66.value > threshold=0.03300449997186661
node_794: feature_name=n330	n330.value > threshold=0.028506500646471977
node_804: feature_name=w180	w180.value > threshold=0.04491250030696392
node_814: feature_name=hsa04261	hsa04261.value > threshold=0.09786725789308548
node_816: feature_name=hsa05220	hsa05220.value <= threshold=0.9063979089260101
node_817: feature_name=n481	n481.value > threshold=-0.04633349925279617
node_823: feature_name=n158	n158.value <= threshold=-0.021260499954223633
node_824: feature_name=n262	n262.value > threshold=0.0704055018723011
node_828: feature_name=n304	n304.value <= threshold=-0.05463600158691406
node_829: feature_name=w145	w145.value <= threshold=-0.11490200087428093
node_830: feature_name=n270	n270.value > threshold=0.1175365000963211
node_842: feature_name=n193	n193.value <= threshold=0.0616455003619194
Class: LUSC
Rules_32	passed counts:14
node_0: feature_name=hsa05216	hsa05216.value <= threshold=0.008738384582102299
node_1: feature_name=hsa04960	hsa04960.value <= threshold=1.185187578201294
node_2: feature_name=n361	n361.value <= threshold=0.009753999765962362
node_3: feature_name=w165	w165.value <= threshold=-0.04168100096285343
node_4: feature_name=hsa05211	hsa05211.value <= threshold=0.6950022280216217
node_5: feature_name=hsa05221	hsa05221.value <= threshold=1.1011908054351807
node_6: feature_name=n112	n112.value > threshold=0.05051000043749809
node_244: feature_name=n432	n432.value <= threshold=-0.022601500153541565
node_245: feature_name=w167	w167.value <= threshold=0.030672499909996986
node_246: feature_name=n445	n445.value <= threshold=0.031444999389350414
Class: OV
Rules_33	passed counts:13
node_0: feature_name=hsa05216	hsa05216.value > threshold=0.008738384582102299
node_1064: feature_name=hsa05211	hsa05211.value > threshold=0.01115855760872364
node_1478: feature_name=hsa04730	hsa04730.value <= threshold=0.4203944057226181
node_1479: feature_name=hsa04150	hsa04150.value > threshold=0.8959079086780548
node_1619: feature_name=hsa05130	hsa05130.value <= threshold=0.07932376489043236
node_1620: feature_name=w169	w169.value <= threshold=0.3342739939689636
node_1621: feature_name=hsa05216	hsa05216.value > threshold=1.2325550317764282
Class: BRCA
Rules_34	passed counts:13
node_0: feature_name=hsa05216	hsa05216.value > threshold=0.008738384582102299
node_1064: feature_name=hsa05211	hsa05211.value > threshold=0.01115855760872364
node_1478: feature_name=hsa04730	hsa04730.value <= threshold=0.4203944057226181
node_1479: feature_name=hsa04150	hsa04150.value <= threshold=0.8959079086780548
node_1480: feature_name=hsa04740	hsa04740.value <= threshold=0.8457262516021729
node_1481: feature_name=w39	w39.value <= threshold=-0.059428999200463295
node_1482: feature_name=n100	n100.value > threshold=-0.03869449906051159
node_1490: feature_name=n279	n279.value <= threshold=-0.07343199849128723
Class: OV
Rules_35	passed counts:13
node_0: feature_name=hsa05216	hsa05216.value > threshold=0.008738384582102299
node_1064: feature_name=hsa05211	hsa05211.value <= threshold=0.01115855760872364
node_1065: feature_name=w39	w39.value <= threshold=-0.04286150075495243
node_1066: feature_name=hsa05216	hsa05216.value > threshold=0.99088454246521
node_1098: feature_name=n282	n282.value <= threshold=0.03852050006389618
node_1099: feature_name=hsa05212	hsa05212.value > threshold=0.8910437226295471
node_1183: feature_name=hsa05218	hsa05218.value <= threshold=1.8006192445755005
node_1184: feature_name=n133	n133.value <= threshold=-0.03374200128018856
node_1185: feature_name=w148	w148.value <= threshold=-0.03721199929714203
node_1186: feature_name=n246	n246.value <= threshold=-0.016512500122189522
node_1187: feature_name=n473	n473.value > threshold=-0.0650320015847683
Class: OV
Rules_36	passed counts:13
node_0: feature_name=hsa05216	hsa05216.value <= threshold=0.008738384582102299
node_1: feature_name=hsa04960	hsa04960.value <= threshold=1.185187578201294
node_2: feature_name=n361	n361.value > threshold=0.009753999765962362
node_328: feature_name=n466	n466.value <= threshold=-0.05319850146770477
node_329: feature_name=hsa04261	hsa04261.value > threshold=0.015952877700328827
node_659: feature_name=hsa04740	hsa04740.value <= threshold=1.3273355960845947
node_660: feature_name=n462	n462.value > threshold=0.03411350026726723
node_774: feature_name=hsa05100	hsa05100.value > threshold=1.0211573839187622
node_932: feature_name=hsa04919	hsa04919.value > threshold=0.6593039929866791
Class: HNSC
Rules_37	passed counts:13
node_0: feature_name=hsa05216	hsa05216.value <= threshold=0.008738384582102299
node_1: feature_name=hsa04960	hsa04960.value <= threshold=1.185187578201294
node_2: feature_name=n361	n361.value > threshold=0.009753999765962362
node_328: feature_name=n466	n466.value <= threshold=-0.05319850146770477
node_329: feature_name=hsa04261	hsa04261.value <= threshold=0.015952877700328827
node_330: feature_name=hsa05218	hsa05218.value <= threshold=0.6024213135242462
node_331: feature_name=hsa05211	hsa05211.value <= threshold=0.6050123870372772
node_332: feature_name=hsa03440	hsa03440.value <= threshold=0.826141357421875
node_333: feature_name=w78	w78.value <= threshold=0.26707249879837036
node_334: feature_name=n89	n89.value <= threshold=0.03955399990081787
node_335: feature_name=n379	n379.value <= threshold=-0.013270499650388956
node_336: feature_name=n105	n105.value <= threshold=-0.009290999732911587
node_337: feature_name=n355	n355.value > threshold=0.051767999306321144
node_423: feature_name=n481	n481.value > threshold=-0.05572600103914738
node_427: feature_name=n44	n44.value <= threshold=0.03428400121629238
node_428: feature_name=hsa04620	hsa04620.value <= threshold=0.17126011848449707
Class: BRCA
Rules_38	passed counts:13
node_0: feature_name=hsa05216	hsa05216.value <= threshold=0.008738384582102299
node_1: feature_name=hsa04960	hsa04960.value <= threshold=1.185187578201294
node_2: feature_name=n361	n361.value <= threshold=0.009753999765962362
node_3: feature_name=w165	w165.value <= threshold=-0.04168100096285343
node_4: feature_name=hsa05211	hsa05211.value <= threshold=0.6950022280216217
node_5: feature_name=hsa05221	hsa05221.value > threshold=1.1011908054351807
node_261: feature_name=hsa04012	hsa04012.value <= threshold=0.20775344967842102
Class: LAML
Rules_39	passed counts:12
node_0: feature_name=hsa05216	hsa05216.value > threshold=0.008738384582102299
node_1064: feature_name=hsa05211	hsa05211.value > threshold=0.01115855760872364
node_1478: feature_name=hsa04730	hsa04730.value > threshold=0.4203944057226181
node_1668: feature_name=hsa04740	hsa04740.value <= threshold=1.529222011566162
node_1669: feature_name=n462	n462.value > threshold=0.04168100096285343
node_1801: feature_name=w59	w59.value > threshold=0.1346680000424385
node_1805: feature_name=hsa00562	hsa00562.value > threshold=0.7899944186210632
node_1903: feature_name=n447	n447.value > threshold=-0.0701340027153492
node_1929: feature_name=hsa04666	hsa04666.value <= threshold=0.5750432908535004
node_1930: feature_name=n368	n368.value <= threshold=0.020759000442922115
Class: COADREAD
Rules_40	passed counts:12
node_0: feature_name=hsa05216	hsa05216.value > threshold=0.008738384582102299
node_1064: feature_name=hsa05211	hsa05211.value > threshold=0.01115855760872364
node_1478: feature_name=hsa04730	hsa04730.value <= threshold=0.4203944057226181
node_1479: feature_name=hsa04150	hsa04150.value <= threshold=0.8959079086780548
node_1480: feature_name=hsa04740	hsa04740.value <= threshold=0.8457262516021729
node_1481: feature_name=w39	w39.value > threshold=-0.059428999200463295
node_1497: feature_name=hsa05212	hsa05212.value > threshold=0.022007528692483902
node_1505: feature_name=n102	n102.value > threshold=0.062161000445485115
node_1549: feature_name=n360	n360.value > threshold=-0.0414854995906353
node_1555: feature_name=hsa04666	hsa04666.value <= threshold=0.8284739255905151
node_1556: feature_name=w245	w245.value <= threshold=-0.1068740002810955
node_1557: feature_name=hsa04380	hsa04380.value > threshold=0.01892276667058468
node_1567: feature_name=n29	n29.value <= threshold=0.042861999943852425
node_1568: feature_name=n392	n392.value <= threshold=0.013789499644190073
node_1569: feature_name=w245	w245.value <= threshold=-0.11387600004673004
node_1570: feature_name=hsa04015	hsa04015.value <= threshold=1.8731772899627686
Class: BLCA
Rules_41	passed counts:12
node_0: feature_name=hsa05216	hsa05216.value > threshold=0.008738384582102299
node_1064: feature_name=hsa05211	hsa05211.value <= threshold=0.01115855760872364
node_1065: feature_name=w39	w39.value > threshold=-0.04286150075495243
node_1305: feature_name=hsa05216	hsa05216.value > threshold=0.7611925005912781
node_1335: feature_name=w232	w232.value > threshold=-0.12021699920296669
node_1343: feature_name=hsa05218	hsa05218.value <= threshold=1.6813135147094727
node_1344: feature_name=hsa05210	hsa05210.value > threshold=0.5064268708229065
node_1376: feature_name=n6	n6.value > threshold=0.045470500364899635
node_1462: feature_name=n165	n165.value <= threshold=0.0301919998601079
Class: COADREAD
Rules_42	passed counts:12
node_0: feature_name=hsa05216	hsa05216.value > threshold=0.008738384582102299
node_1064: feature_name=hsa05211	hsa05211.value <= threshold=0.01115855760872364
node_1065: feature_name=w39	w39.value > threshold=-0.04286150075495243
node_1305: feature_name=hsa05216	hsa05216.value > threshold=0.7611925005912781
node_1335: feature_name=w232	w232.value > threshold=-0.12021699920296669
node_1343: feature_name=hsa05218	hsa05218.value <= threshold=1.6813135147094727
node_1344: feature_name=hsa05210	hsa05210.value > threshold=0.5064268708229065
node_1376: feature_name=n6	n6.value <= threshold=0.045470500364899635
node_1377: feature_name=n53	n53.value <= threshold=-0.03459149971604347
node_1378: feature_name=w119	w119.value <= threshold=-0.08481550216674805
node_1379: feature_name=hsa04670	hsa04670.value <= threshold=0.14666104316711426
Class: BRCA
Rules_43	passed counts:12
node_0: feature_name=hsa05216	hsa05216.value > threshold=0.008738384582102299
node_1064: feature_name=hsa05211	hsa05211.value <= threshold=0.01115855760872364
node_1065: feature_name=w39	w39.value > threshold=-0.04286150075495243
node_1305: feature_name=hsa05216	hsa05216.value > threshold=0.7611925005912781
node_1335: feature_name=w232	w232.value <= threshold=-0.12021699920296669
node_1336: feature_name=hsa04919	hsa04919.value > threshold=0.5852255821228027
node_1340: feature_name=n212	n212.value <= threshold=-0.0012424999149516225
Class: UCEC
Rules_44	passed counts:12
node_0: feature_name=hsa05216	hsa05216.value <= threshold=0.008738384582102299
node_1: feature_name=hsa04960	hsa04960.value <= threshold=1.185187578201294
node_2: feature_name=n361	n361.value > threshold=0.009753999765962362
node_328: feature_name=n466	n466.value <= threshold=-0.05319850146770477
node_329: feature_name=hsa04261	hsa04261.value > threshold=0.015952877700328827
node_659: feature_name=hsa04740	hsa04740.value > threshold=1.3273355960845947
node_947: feature_name=hsa04930	hsa04930.value <= threshold=0.46177762746810913
node_948: feature_name=hsa04020	hsa04020.value > threshold=0.40477143228054047
node_958: feature_name=n323	n323.value <= threshold=0.03883599862456322
Class: LUAD
Rules_45	passed counts:12
node_0: feature_name=hsa05216	hsa05216.value <= threshold=0.008738384582102299
node_1: feature_name=hsa04960	hsa04960.value <= threshold=1.185187578201294
node_2: feature_name=n361	n361.value <= threshold=0.009753999765962362
node_3: feature_name=w165	w165.value <= threshold=-0.04168100096285343
node_4: feature_name=hsa05211	hsa05211.value <= threshold=0.6950022280216217
node_5: feature_name=hsa05221	hsa05221.value <= threshold=1.1011908054351807
node_6: feature_name=n112	n112.value <= threshold=0.05051000043749809
node_7: feature_name=hsa00562	hsa00562.value > threshold=0.05919164419174194
node_181: feature_name=n397	n397.value > threshold=-0.09940899908542633
node_183: feature_name=hsa04010	hsa04010.value <= threshold=0.008739734999835491
node_184: feature_name=w97	w97.value > threshold=0.008147499989718199
node_196: feature_name=n461	n461.value > threshold=0.0702895000576973
node_198: feature_name=w39	w39.value <= threshold=0.0011900000972673297
Class: OV
Rules_46	passed counts:12
node_0: feature_name=hsa05216	hsa05216.value <= threshold=0.008738384582102299
node_1: feature_name=hsa04960	hsa04960.value <= threshold=1.185187578201294
node_2: feature_name=n361	n361.value <= threshold=0.009753999765962362
node_3: feature_name=w165	w165.value <= threshold=-0.04168100096285343
node_4: feature_name=hsa05211	hsa05211.value <= threshold=0.6950022280216217
node_5: feature_name=hsa05221	hsa05221.value <= threshold=1.1011908054351807
node_6: feature_name=n112	n112.value <= threshold=0.05051000043749809
node_7: feature_name=hsa00562	hsa00562.value <= threshold=0.05919164419174194
node_8: feature_name=n236	n236.value > threshold=0.013442500028759241
node_168: feature_name=n350	n350.value <= threshold=0.013260000385344028
node_169: feature_name=n250	n250.value > threshold=-0.010468999855220318
node_171: feature_name=w78	w78.value > threshold=0.24413099884986877
Class: BRCA
Rules_47	passed counts:12
node_0: feature_name=hsa05216	hsa05216.value <= threshold=0.008738384582102299
node_1: feature_name=hsa04960	hsa04960.value <= threshold=1.185187578201294
node_2: feature_name=n361	n361.value <= threshold=0.009753999765962362
node_3: feature_name=w165	w165.value <= threshold=-0.04168100096285343
node_4: feature_name=hsa05211	hsa05211.value <= threshold=0.6950022280216217
node_5: feature_name=hsa05221	hsa05221.value <= threshold=1.1011908054351807
node_6: feature_name=n112	n112.value <= threshold=0.05051000043749809
node_7: feature_name=hsa00562	hsa00562.value <= threshold=0.05919164419174194
node_8: feature_name=n236	n236.value <= threshold=0.013442500028759241
node_9: feature_name=n465	n465.value <= threshold=0.0699944980442524
node_10: feature_name=n212	n212.value <= threshold=0.025276999920606613
node_11: feature_name=n13	n13.value <= threshold=0.04890100099146366
node_12: feature_name=n413	n413.value > threshold=-0.05739950016140938
node_80: feature_name=w41	w41.value <= threshold=-0.12907050549983978
node_81: feature_name=n471	n471.value <= threshold=0.021368499845266342
node_82: feature_name=w44	w44.value > threshold=-0.26690949499607086
node_96: feature_name=w124	w124.value <= threshold=0.12206149846315384
Class: BRCA
Rules_48	passed counts:11
node_0: feature_name=hsa05216	hsa05216.value > threshold=0.008738384582102299
node_1064: feature_name=hsa05211	hsa05211.value > threshold=0.01115855760872364
node_1478: feature_name=hsa04730	hsa04730.value > threshold=0.4203944057226181
node_1668: feature_name=hsa04740	hsa04740.value <= threshold=1.529222011566162
node_1669: feature_name=n462	n462.value <= threshold=0.04168100096285343
node_1670: feature_name=hsa04320	hsa04320.value > threshold=0.7822191715240479
node_1742: feature_name=hsa00562	hsa00562.value <= threshold=1.9364370703697205
node_1743: feature_name=hsa05230	hsa05230.value <= threshold=0.6107595264911652
node_1744: feature_name=n222	n222.value <= threshold=-0.11944949999451637
node_1745: feature_name=hsa04370	hsa04370.value > threshold=0.21371382474899292
Class: LUAD
Rules_49	passed counts:11
node_0: feature_name=hsa05216	hsa05216.value > threshold=0.008738384582102299
node_1064: feature_name=hsa05211	hsa05211.value > threshold=0.01115855760872364
node_1478: feature_name=hsa04730	hsa04730.value > threshold=0.4203944057226181
node_1668: feature_name=hsa04740	hsa04740.value <= threshold=1.529222011566162
node_1669: feature_name=n462	n462.value <= threshold=0.04168100096285343
node_1670: feature_name=hsa04320	hsa04320.value <= threshold=0.7822191715240479
node_1671: feature_name=n263	n263.value <= threshold=-0.09555699676275253
node_1672: feature_name=w148	w148.value <= threshold=-0.0017140000127255917
node_1673: feature_name=hsa05162	hsa05162.value <= threshold=0.505336582660675
node_1674: feature_name=n68	n68.value > threshold=-0.1169234998524189
node_1678: feature_name=n235	n235.value > threshold=-0.0056859999895095825
Class: COADREAD
Rules_50	passed counts:11
node_0: feature_name=hsa05216	hsa05216.value <= threshold=0.008738384582102299
node_1: feature_name=hsa04960	hsa04960.value <= threshold=1.185187578201294
node_2: feature_name=n361	n361.value > threshold=0.009753999765962362
node_328: feature_name=n466	n466.value <= threshold=-0.05319850146770477
node_329: feature_name=hsa04261	hsa04261.value > threshold=0.015952877700328827
node_659: feature_name=hsa04740	hsa04740.value <= threshold=1.3273355960845947
node_660: feature_name=n462	n462.value > threshold=0.03411350026726723
node_774: feature_name=hsa05100	hsa05100.value <= threshold=1.0211573839187622
node_775: feature_name=hsa04620	hsa04620.value <= threshold=0.534568190574646
node_776: feature_name=n29	n29.value > threshold=0.03420750051736832
node_780: feature_name=n171	n171.value > threshold=0.0236395001411438
node_784: feature_name=n192	n192.value > threshold=0.007774000288918614
node_792: feature_name=n66	n66.value > threshold=0.03300449997186661
node_794: feature_name=n330	n330.value > threshold=0.028506500646471977
node_804: feature_name=w180	w180.value <= threshold=0.04491250030696392
node_805: feature_name=n360	n360.value > threshold=-0.027771499939262867
node_811: feature_name=n371	n371.value > threshold=0.002035000012256205
Class: HNSC
Rules_51	passed counts:11
node_0: feature_name=hsa05216	hsa05216.value <= threshold=0.008738384582102299
node_1: feature_name=hsa04960	hsa04960.value <= threshold=1.185187578201294
node_2: feature_name=n361	n361.value <= threshold=0.009753999765962362
node_3: feature_name=w165	w165.value <= threshold=-0.04168100096285343
node_4: feature_name=hsa05211	hsa05211.value > threshold=0.6950022280216217
node_266: feature_name=hsa05212	hsa05212.value > threshold=0.7019358277320862
node_286: feature_name=n318	n318.value > threshold=0.023229499347507954
node_294: feature_name=n286	n286.value > threshold=-0.007991500198841095
node_300: feature_name=w169	w169.value > threshold=0.3230750113725662
node_304: feature_name=hsa04380	hsa04380.value <= threshold=2.0781519412994385
Class: BRCA
Rules_52	passed counts:10
node_0: feature_name=hsa05216	hsa05216.value > threshold=0.008738384582102299
node_1064: feature_name=hsa05211	hsa05211.value > threshold=0.01115855760872364
node_1478: feature_name=hsa04730	hsa04730.value <= threshold=0.4203944057226181
node_1479: feature_name=hsa04150	hsa04150.value <= threshold=0.8959079086780548
node_1480: feature_name=hsa04740	hsa04740.value <= threshold=0.8457262516021729
node_1481: feature_name=w39	w39.value > threshold=-0.059428999200463295
node_1497: feature_name=hsa05212	hsa05212.value > threshold=0.022007528692483902
node_1505: feature_name=n102	n102.value <= threshold=0.062161000445485115
node_1506: feature_name=w82	w82.value > threshold=0.3311319947242737
node_1542: feature_name=w216	w216.value > threshold=-0.10944099724292755
Class: HNSC
Rules_53	passed counts:10
node_0: feature_name=hsa05216	hsa05216.value > threshold=0.008738384582102299
node_1064: feature_name=hsa05211	hsa05211.value <= threshold=0.01115855760872364
node_1065: feature_name=w39	w39.value > threshold=-0.04286150075495243
node_1305: feature_name=hsa05216	hsa05216.value > threshold=0.7611925005912781
node_1335: feature_name=w232	w232.value > threshold=-0.12021699920296669
node_1343: feature_name=hsa05218	hsa05218.value > threshold=1.6813135147094727
node_1469: feature_name=n229	n229.value > threshold=0.00824799994006753
node_1475: feature_name=n170	n170.value <= threshold=0.05022149905562401
Class: GBM
Rules_54	passed counts:10
node_0: feature_name=hsa05216	hsa05216.value <= threshold=0.008738384582102299
node_1: feature_name=hsa04960	hsa04960.value <= threshold=1.185187578201294
node_2: feature_name=n361	n361.value > threshold=0.009753999765962362
node_328: feature_name=n466	n466.value <= threshold=-0.05319850146770477
node_329: feature_name=hsa04261	hsa04261.value > threshold=0.015952877700328827
node_659: feature_name=hsa04740	hsa04740.value <= threshold=1.3273355960845947
node_660: feature_name=n462	n462.value > threshold=0.03411350026726723
node_774: feature_name=hsa05100	hsa05100.value <= threshold=1.0211573839187622
node_775: feature_name=hsa04620	hsa04620.value > threshold=0.534568190574646
node_895: feature_name=n76	n76.value > threshold=0.004630500101484358
node_927: feature_name=n234	n234.value <= threshold=0.07478750124573708
node_928: feature_name=n303	n303.value <= threshold=0.044311000034213066
Class: BRCA
Rules_55	passed counts:10
node_0: feature_name=hsa05216	hsa05216.value <= threshold=0.008738384582102299
node_1: feature_name=hsa04960	hsa04960.value <= threshold=1.185187578201294
node_2: feature_name=n361	n361.value > threshold=0.009753999765962362
node_328: feature_name=n466	n466.value <= threshold=-0.05319850146770477
node_329: feature_name=hsa04261	hsa04261.value > threshold=0.015952877700328827
node_659: feature_name=hsa04740	hsa04740.value <= threshold=1.3273355960845947
node_660: feature_name=n462	n462.value <= threshold=0.03411350026726723
node_661: feature_name=n312	n312.value <= threshold=0.04324200004339218
node_662: feature_name=n216	n216.value > threshold=-0.020075999200344086
node_676: feature_name=n56	n56.value > threshold=-0.06908449903130531
node_678: feature_name=hsa04921	hsa04921.value > threshold=0.42061077058315277
node_706: feature_name=n222	n222.value > threshold=-0.12142699956893921
node_750: feature_name=w160	w160.value <= threshold=-0.002951999893411994
node_751: feature_name=hsa05206	hsa05206.value <= threshold=0.8161296844482422
node_752: feature_name=n458	n458.value > threshold=0.006161999888718128
Class: BRCA
Rules_56	passed counts:10
node_0: feature_name=hsa05216	hsa05216.value <= threshold=0.008738384582102299
node_1: feature_name=hsa04960	hsa04960.value <= threshold=1.185187578201294
node_2: feature_name=n361	n361.value > threshold=0.009753999765962362
node_328: feature_name=n466	n466.value <= threshold=-0.05319850146770477
node_329: feature_name=hsa04261	hsa04261.value <= threshold=0.015952877700328827
node_330: feature_name=hsa05218	hsa05218.value <= threshold=0.6024213135242462
node_331: feature_name=hsa05211	hsa05211.value <= threshold=0.6050123870372772
node_332: feature_name=hsa03440	hsa03440.value <= threshold=0.826141357421875
node_333: feature_name=w78	w78.value <= threshold=0.26707249879837036
node_334: feature_name=n89	n89.value <= threshold=0.03955399990081787
node_335: feature_name=n379	n379.value <= threshold=-0.013270499650388956
node_336: feature_name=n105	n105.value <= threshold=-0.009290999732911587
node_337: feature_name=n355	n355.value <= threshold=0.051767999306321144
node_338: feature_name=n128	n128.value <= threshold=0.0660490021109581
node_339: feature_name=n160	n160.value <= threshold=0.016430500894784927
node_340: feature_name=n397	n397.value <= threshold=-0.07430350035429001
node_341: feature_name=w221	w221.value > threshold=0.23139650374650955
node_343: feature_name=w32	w32.value <= threshold=0.09962249919772148
node_344: feature_name=hsa04071	hsa04071.value <= threshold=0.10092143714427948
node_345: feature_name=w108	w108.value > threshold=0.31302550435066223
node_351: feature_name=hsa04921	hsa04921.value <= threshold=0.28599467873573303
Class: KIRC
Rules_57	passed counts:10
node_0: feature_name=hsa05216	hsa05216.value <= threshold=0.008738384582102299
node_1: feature_name=hsa04960	hsa04960.value <= threshold=1.185187578201294
node_2: feature_name=n361	n361.value <= threshold=0.009753999765962362
node_3: feature_name=w165	w165.value <= threshold=-0.04168100096285343
node_4: feature_name=hsa05211	hsa05211.value > threshold=0.6950022280216217
node_266: feature_name=hsa05212	hsa05212.value > threshold=0.7019358277320862
node_286: feature_name=n318	n318.value <= threshold=0.023229499347507954
node_287: feature_name=n54	n54.value <= threshold=0.07512449845671654
Class: KIRC
Rules_58	passed counts:10
node_0: feature_name=hsa05216	hsa05216.value <= threshold=0.008738384582102299
node_1: feature_name=hsa04960	hsa04960.value <= threshold=1.185187578201294
node_2: feature_name=n361	n361.value <= threshold=0.009753999765962362
node_3: feature_name=w165	w165.value <= threshold=-0.04168100096285343
node_4: feature_name=hsa05211	hsa05211.value <= threshold=0.6950022280216217
node_5: feature_name=hsa05221	hsa05221.value <= threshold=1.1011908054351807
node_6: feature_name=n112	n112.value <= threshold=0.05051000043749809
node_7: feature_name=hsa00562	hsa00562.value <= threshold=0.05919164419174194
node_8: feature_name=n236	n236.value <= threshold=0.013442500028759241
node_9: feature_name=n465	n465.value > threshold=0.0699944980442524
node_155: feature_name=n266	n266.value <= threshold=0.0022345000179484487
node_156: feature_name=w23	w23.value > threshold=0.021523999981582165
Class: BRCA
Rules_59	passed counts:9
node_0: feature_name=hsa05216	hsa05216.value > threshold=0.008738384582102299
node_1064: feature_name=hsa05211	hsa05211.value > threshold=0.01115855760872364
node_1478: feature_name=hsa04730	hsa04730.value > threshold=0.4203944057226181
node_1668: feature_name=hsa04740	hsa04740.value <= threshold=1.529222011566162
node_1669: feature_name=n462	n462.value > threshold=0.04168100096285343
node_1801: feature_name=w59	w59.value > threshold=0.1346680000424385
node_1805: feature_name=hsa00562	hsa00562.value <= threshold=0.7899944186210632
node_1806: feature_name=hsa05213	hsa05213.value <= threshold=1.5140634179115295
node_1807: feature_name=n115	n115.value <= threshold=0.020373000763356686
node_1808: feature_name=hsa04914	hsa04914.value > threshold=0.23568803071975708
node_1816: feature_name=n76	n76.value > threshold=-0.011783000081777573
Class: LUAD
Rules_60	passed counts:9
node_0: feature_name=hsa05216	hsa05216.value > threshold=0.008738384582102299
node_1064: feature_name=hsa05211	hsa05211.value > threshold=0.01115855760872364
node_1478: feature_name=hsa04730	hsa04730.value > threshold=0.4203944057226181
node_1668: feature_name=hsa04740	hsa04740.value <= threshold=1.529222011566162
node_1669: feature_name=n462	n462.value <= threshold=0.04168100096285343
node_1670: feature_name=hsa04320	hsa04320.value <= threshold=0.7822191715240479
node_1671: feature_name=n263	n263.value <= threshold=-0.09555699676275253
node_1672: feature_name=w148	w148.value > threshold=-0.0017140000127255917
node_1694: feature_name=n471	n471.value <= threshold=0.01637549977749586
node_1695: feature_name=n357	n357.value > threshold=0.06689000129699707
Class: LUSC
Rules_61	passed counts:9
node_0: feature_name=hsa05216	hsa05216.value > threshold=0.008738384582102299
node_1064: feature_name=hsa05211	hsa05211.value > threshold=0.01115855760872364
node_1478: feature_name=hsa04730	hsa04730.value <= threshold=0.4203944057226181
node_1479: feature_name=hsa04150	hsa04150.value > threshold=0.8959079086780548
node_1619: feature_name=hsa05130	hsa05130.value <= threshold=0.07932376489043236
node_1620: feature_name=w169	w169.value > threshold=0.3342739939689636
node_1630: feature_name=n312	n312.value > threshold=0.0329780001193285
node_1644: feature_name=n368	n368.value > threshold=0.018121999688446522
Class: UCEC
Rules_62	passed counts:9
node_0: feature_name=hsa05216	hsa05216.value > threshold=0.008738384582102299
node_1064: feature_name=hsa05211	hsa05211.value <= threshold=0.01115855760872364
node_1065: feature_name=w39	w39.value > threshold=-0.04286150075495243
node_1305: feature_name=hsa05216	hsa05216.value > threshold=0.7611925005912781
node_1335: feature_name=w232	w232.value > threshold=-0.12021699920296669
node_1343: feature_name=hsa05218	hsa05218.value <= threshold=1.6813135147094727
node_1344: feature_name=hsa05210	hsa05210.value <= threshold=0.5064268708229065
node_1345: feature_name=hsa04151	hsa04151.value > threshold=0.20920895040035248
node_1357: feature_name=n364	n364.value <= threshold=0.013187000062316656
node_1358: feature_name=n182	n182.value > threshold=-0.009477000217884779
node_1360: feature_name=n133	n133.value > threshold=-0.0535729993134737
node_1368: feature_name=n371	n371.value > threshold=0.0021725000551668927
Class: LUSC
Rules_63	passed counts:9
node_0: feature_name=hsa05216	hsa05216.value > threshold=0.008738384582102299
node_1064: feature_name=hsa05211	hsa05211.value <= threshold=0.01115855760872364
node_1065: feature_name=w39	w39.value <= threshold=-0.04286150075495243
node_1066: feature_name=hsa05216	hsa05216.value <= threshold=0.99088454246521
node_1067: feature_name=n61	n61.value > threshold=0.02202500030398369
node_1093: feature_name=hsa05203	hsa05203.value <= threshold=1.0426702797412872
Class: COADREAD
Rules_64	passed counts:9
node_0: feature_name=hsa05216	hsa05216.value <= threshold=0.008738384582102299
node_1: feature_name=hsa04960	hsa04960.value <= threshold=1.185187578201294
node_2: feature_name=n361	n361.value > threshold=0.009753999765962362
node_328: feature_name=n466	n466.value <= threshold=-0.05319850146770477
node_329: feature_name=hsa04261	hsa04261.value > threshold=0.015952877700328827
node_659: feature_name=hsa04740	hsa04740.value <= threshold=1.3273355960845947
node_660: feature_name=n462	n462.value > threshold=0.03411350026726723
node_774: feature_name=hsa05100	hsa05100.value <= threshold=1.0211573839187622
node_775: feature_name=hsa04620	hsa04620.value <= threshold=0.534568190574646
node_776: feature_name=n29	n29.value > threshold=0.03420750051736832
node_780: feature_name=n171	n171.value > threshold=0.0236395001411438
node_784: feature_name=n192	n192.value > threshold=0.007774000288918614
node_792: feature_name=n66	n66.value > threshold=0.03300449997186661
node_794: feature_name=n330	n330.value > threshold=0.028506500646471977
node_804: feature_name=w180	w180.value > threshold=0.04491250030696392
node_814: feature_name=hsa04261	hsa04261.value > threshold=0.09786725789308548
node_816: feature_name=hsa05220	hsa05220.value <= threshold=0.9063979089260101
node_817: feature_name=n481	n481.value > threshold=-0.04633349925279617
node_823: feature_name=n158	n158.value > threshold=-0.021260499954223633
node_887: feature_name=w5	w5.value <= threshold=0.11486750096082687
Class: HNSC
Rules_65	passed counts:9
node_0: feature_name=hsa05216	hsa05216.value <= threshold=0.008738384582102299
node_1: feature_name=hsa04960	hsa04960.value <= threshold=1.185187578201294
node_2: feature_name=n361	n361.value > threshold=0.009753999765962362
node_328: feature_name=n466	n466.value <= threshold=-0.05319850146770477
node_329: feature_name=hsa04261	hsa04261.value <= threshold=0.015952877700328827
node_330: feature_name=hsa05218	hsa05218.value <= threshold=0.6024213135242462
node_331: feature_name=hsa05211	hsa05211.value <= threshold=0.6050123870372772
node_332: feature_name=hsa03440	hsa03440.value <= threshold=0.826141357421875
node_333: feature_name=w78	w78.value <= threshold=0.26707249879837036
node_334: feature_name=n89	n89.value <= threshold=0.03955399990081787
node_335: feature_name=n379	n379.value <= threshold=-0.013270499650388956
node_336: feature_name=n105	n105.value <= threshold=-0.009290999732911587
node_337: feature_name=n355	n355.value <= threshold=0.051767999306321144
node_338: feature_name=n128	n128.value <= threshold=0.0660490021109581
node_339: feature_name=n160	n160.value > threshold=0.016430500894784927
node_405: feature_name=n412	n412.value > threshold=-0.05814249999821186
Class: KIRC
Rules_66	passed counts:9
node_0: feature_name=hsa05216	hsa05216.value <= threshold=0.008738384582102299
node_1: feature_name=hsa04960	hsa04960.value <= threshold=1.185187578201294
node_2: feature_name=n361	n361.value <= threshold=0.009753999765962362
node_3: feature_name=w165	w165.value > threshold=-0.04168100096285343
node_307: feature_name=w171	w171.value > threshold=-0.037789998576045036
node_311: feature_name=n248	n248.value <= threshold=-0.0178315001539886
node_312: feature_name=hsa04914	hsa04914.value <= threshold=0.6807892918586731
Class: KIRC
Rules_67	passed counts:8
node_0: feature_name=hsa05216	hsa05216.value > threshold=0.008738384582102299
node_1064: feature_name=hsa05211	hsa05211.value > threshold=0.01115855760872364
node_1478: feature_name=hsa04730	hsa04730.value > threshold=0.4203944057226181
node_1668: feature_name=hsa04740	hsa04740.value <= threshold=1.529222011566162
node_1669: feature_name=n462	n462.value > threshold=0.04168100096285343
node_1801: feature_name=w59	w59.value > threshold=0.1346680000424385
node_1805: feature_name=hsa00562	hsa00562.value <= threshold=0.7899944186210632
node_1806: feature_name=hsa05213	hsa05213.value <= threshold=1.5140634179115295
node_1807: feature_name=n115	n115.value > threshold=0.020373000763356686
node_1819: feature_name=hsa04360	hsa04360.value <= threshold=0.9092052578926086
node_1820: feature_name=n299	n299.value <= threshold=-0.09468900039792061
node_1821: feature_name=hsa04115	hsa04115.value <= threshold=1.0050025284290314
node_1822: feature_name=n115	n115.value <= threshold=0.03245849907398224
node_1823: feature_name=n492	n492.value > threshold=-0.07925749942660332
node_1827: feature_name=w245	w245.value > threshold=-0.1462154984474182
node_1831: feature_name=n5	n5.value <= threshold=0.06022599898278713
node_1832: feature_name=hsa04022	hsa04022.value > threshold=0.4839302599430084
Class: UCEC
Rules_68	passed counts:8
node_0: feature_name=hsa05216	hsa05216.value > threshold=0.008738384582102299
node_1064: feature_name=hsa05211	hsa05211.value > threshold=0.01115855760872364
node_1478: feature_name=hsa04730	hsa04730.value <= threshold=0.4203944057226181
node_1479: feature_name=hsa04150	hsa04150.value <= threshold=0.8959079086780548
node_1480: feature_name=hsa04740	hsa04740.value <= threshold=0.8457262516021729
node_1481: feature_name=w39	w39.value > threshold=-0.059428999200463295
node_1497: feature_name=hsa05212	hsa05212.value > threshold=0.022007528692483902
node_1505: feature_name=n102	n102.value <= threshold=0.062161000445485115
node_1506: feature_name=w82	w82.value <= threshold=0.3311319947242737
node_1507: feature_name=n344	n344.value <= threshold=-0.0320459995418787
node_1508: feature_name=n359	n359.value > threshold=-0.055940499529242516
node_1532: feature_name=w88	w88.value <= threshold=-0.11620600149035454
Class: COADREAD
Rules_69	passed counts:8
node_0: feature_name=hsa05216	hsa05216.value > threshold=0.008738384582102299
node_1064: feature_name=hsa05211	hsa05211.value > threshold=0.01115855760872364
node_1478: feature_name=hsa04730	hsa04730.value <= threshold=0.4203944057226181
node_1479: feature_name=hsa04150	hsa04150.value <= threshold=0.8959079086780548
node_1480: feature_name=hsa04740	hsa04740.value <= threshold=0.8457262516021729
node_1481: feature_name=w39	w39.value > threshold=-0.059428999200463295
node_1497: feature_name=hsa05212	hsa05212.value <= threshold=0.022007528692483902
node_1498: feature_name=n211	n211.value > threshold=0.037111999467015266
Class: KIRC
Rules_70	passed counts:8
node_0: feature_name=hsa05216	hsa05216.value > threshold=0.008738384582102299
node_1064: feature_name=hsa05211	hsa05211.value <= threshold=0.01115855760872364
node_1065: feature_name=w39	w39.value > threshold=-0.04286150075495243
node_1305: feature_name=hsa05216	hsa05216.value > threshold=0.7611925005912781
node_1335: feature_name=w232	w232.value > threshold=-0.12021699920296669
node_1343: feature_name=hsa05218	hsa05218.value <= threshold=1.6813135147094727
node_1344: feature_name=hsa05210	hsa05210.value > threshold=0.5064268708229065
node_1376: feature_name=n6	n6.value <= threshold=0.045470500364899635
node_1377: feature_name=n53	n53.value > threshold=-0.03459149971604347
node_1407: feature_name=hsa04310	hsa04310.value > threshold=0.3557337373495102
node_1415: feature_name=hsa04550	hsa04550.value <= threshold=0.9157649874687195
node_1416: feature_name=hsa05146	hsa05146.value <= threshold=0.6711316108703613
node_1417: feature_name=hsa04014	hsa04014.value <= threshold=0.27705129981040955
node_1418: feature_name=w38	w38.value <= threshold=0.05925850011408329
node_1419: feature_name=w42	w42.value <= threshold=0.30439549684524536
node_1420: feature_name=n392	n392.value <= threshold=0.018473499454557896
Class: OV
Rules_71	passed counts:8
node_0: feature_name=hsa05216	hsa05216.value > threshold=0.008738384582102299
node_1064: feature_name=hsa05211	hsa05211.value <= threshold=0.01115855760872364
node_1065: feature_name=w39	w39.value > threshold=-0.04286150075495243
node_1305: feature_name=hsa05216	hsa05216.value > threshold=0.7611925005912781
node_1335: feature_name=w232	w232.value > threshold=-0.12021699920296669
node_1343: feature_name=hsa05218	hsa05218.value <= threshold=1.6813135147094727
node_1344: feature_name=hsa05210	hsa05210.value > threshold=0.5064268708229065
node_1376: feature_name=n6	n6.value <= threshold=0.045470500364899635
node_1377: feature_name=n53	n53.value <= threshold=-0.03459149971604347
node_1378: feature_name=w119	w119.value > threshold=-0.08481550216674805
node_1384: feature_name=hsa05219	hsa05219.value <= threshold=1.030943512916565
node_1385: feature_name=w221	w221.value > threshold=0.24700000137090683
node_1389: feature_name=w182	w182.value <= threshold=0.26918698847293854
node_1390: feature_name=n178	n178.value <= threshold=-0.01368200033903122
Class: BRCA
Rules_72	passed counts:8
node_0: feature_name=hsa05216	hsa05216.value > threshold=0.008738384582102299
node_1064: feature_name=hsa05211	hsa05211.value <= threshold=0.01115855760872364
node_1065: feature_name=w39	w39.value > threshold=-0.04286150075495243
node_1305: feature_name=hsa05216	hsa05216.value <= threshold=0.7611925005912781
node_1306: feature_name=n132	n132.value <= threshold=-0.013973000459372997
node_1307: feature_name=hsa05203	hsa05203.value <= threshold=0.1719512641429901
node_1308: feature_name=n32	n32.value > threshold=0.07674549892544746
node_1312: feature_name=w16	w16.value <= threshold=-0.059025999158620834
Class: LUSC
Rules_73	passed counts:8
node_0: feature_name=hsa05216	hsa05216.value > threshold=0.008738384582102299
node_1064: feature_name=hsa05211	hsa05211.value <= threshold=0.01115855760872364
node_1065: feature_name=w39	w39.value <= threshold=-0.04286150075495243
node_1066: feature_name=hsa05216	hsa05216.value > threshold=0.99088454246521
node_1098: feature_name=n282	n282.value <= threshold=0.03852050006389618
node_1099: feature_name=hsa05212	hsa05212.value <= threshold=0.8910437226295471
node_1100: feature_name=n72	n72.value > threshold=0.015576499979943037
node_1110: feature_name=n197	n197.value > threshold=0.02619349956512451
node_1176: feature_name=n118	n118.value > threshold=0.02364400029182434
Class: COADREAD
Rules_74	passed counts:8
node_0: feature_name=hsa05216	hsa05216.value <= threshold=0.008738384582102299
node_1: feature_name=hsa04960	hsa04960.value > threshold=1.185187578201294
node_1001: feature_name=hsa05210	hsa05210.value > threshold=0.9842148423194885
node_1035: feature_name=w160	w160.value > threshold=-0.029362499713897705
node_1055: feature_name=n134	n134.value > threshold=-0.026364999823272228
node_1061: feature_name=w88	w88.value <= threshold=-0.08345599845051765
Class: BRCA
Rules_75	passed counts:8
node_0: feature_name=hsa05216	hsa05216.value <= threshold=0.008738384582102299
node_1: feature_name=hsa04960	hsa04960.value <= threshold=1.185187578201294
node_2: feature_name=n361	n361.value > threshold=0.009753999765962362
node_328: feature_name=n466	n466.value <= threshold=-0.05319850146770477
node_329: feature_name=hsa04261	hsa04261.value > threshold=0.015952877700328827
node_659: feature_name=hsa04740	hsa04740.value <= threshold=1.3273355960845947
node_660: feature_name=n462	n462.value > threshold=0.03411350026726723
node_774: feature_name=hsa05100	hsa05100.value <= threshold=1.0211573839187622
node_775: feature_name=hsa04620	hsa04620.value <= threshold=0.534568190574646
node_776: feature_name=n29	n29.value > threshold=0.03420750051736832
node_780: feature_name=n171	n171.value > threshold=0.0236395001411438
node_784: feature_name=n192	n192.value > threshold=0.007774000288918614
node_792: feature_name=n66	n66.value > threshold=0.03300449997186661
node_794: feature_name=n330	n330.value > threshold=0.028506500646471977
node_804: feature_name=w180	w180.value > threshold=0.04491250030696392
node_814: feature_name=hsa04261	hsa04261.value > threshold=0.09786725789308548
node_816: feature_name=hsa05220	hsa05220.value <= threshold=0.9063979089260101
node_817: feature_name=n481	n481.value > threshold=-0.04633349925279617
node_823: feature_name=n158	n158.value <= threshold=-0.021260499954223633
node_824: feature_name=n262	n262.value > threshold=0.0704055018723011
node_828: feature_name=n304	n304.value <= threshold=-0.05463600158691406
node_829: feature_name=w145	w145.value > threshold=-0.11490200087428093
node_849: feature_name=n190	n190.value > threshold=0.12410400062799454
node_859: feature_name=n133	n133.value <= threshold=-0.046004001051187515
Class: HNSC
Rules_76	passed counts:8
node_0: feature_name=hsa05216	hsa05216.value <= threshold=0.008738384582102299
node_1: feature_name=hsa04960	hsa04960.value <= threshold=1.185187578201294
node_2: feature_name=n361	n361.value > threshold=0.009753999765962362
node_328: feature_name=n466	n466.value <= threshold=-0.05319850146770477
node_329: feature_name=hsa04261	hsa04261.value > threshold=0.015952877700328827
node_659: feature_name=hsa04740	hsa04740.value <= threshold=1.3273355960845947
node_660: feature_name=n462	n462.value <= threshold=0.03411350026726723
node_661: feature_name=n312	n312.value <= threshold=0.04324200004339218
node_662: feature_name=n216	n216.value > threshold=-0.020075999200344086
node_676: feature_name=n56	n56.value > threshold=-0.06908449903130531
node_678: feature_name=hsa04921	hsa04921.value > threshold=0.42061077058315277
node_706: feature_name=n222	n222.value <= threshold=-0.12142699956893921
node_707: feature_name=n330	n330.value > threshold=0.03167800046503544
node_715: feature_name=w235	w235.value <= threshold=0.03764500096440315
node_716: feature_name=n492	n492.value > threshold=-0.07337350025773048
node_724: feature_name=n419	n419.value <= threshold=-0.0287240007892251
Class: HNSC
Rules_77	passed counts:8
node_0: feature_name=hsa05216	hsa05216.value <= threshold=0.008738384582102299
node_1: feature_name=hsa04960	hsa04960.value <= threshold=1.185187578201294
node_2: feature_name=n361	n361.value > threshold=0.009753999765962362
node_328: feature_name=n466	n466.value <= threshold=-0.05319850146770477
node_329: feature_name=hsa04261	hsa04261.value > threshold=0.015952877700328827
node_659: feature_name=hsa04740	hsa04740.value <= threshold=1.3273355960845947
node_660: feature_name=n462	n462.value <= threshold=0.03411350026726723
node_661: feature_name=n312	n312.value <= threshold=0.04324200004339218
node_662: feature_name=n216	n216.value > threshold=-0.020075999200344086
node_676: feature_name=n56	n56.value > threshold=-0.06908449903130531
node_678: feature_name=hsa04921	hsa04921.value > threshold=0.42061077058315277
node_706: feature_name=n222	n222.value <= threshold=-0.12142699956893921
node_707: feature_name=n330	n330.value <= threshold=0.03167800046503544
node_708: feature_name=n141	n141.value <= threshold=0.06226699985563755
Class: GBM
Rules_78	passed counts:8
node_0: feature_name=hsa05216	hsa05216.value <= threshold=0.008738384582102299
node_1: feature_name=hsa04960	hsa04960.value <= threshold=1.185187578201294
node_2: feature_name=n361	n361.value > threshold=0.009753999765962362
node_328: feature_name=n466	n466.value <= threshold=-0.05319850146770477
node_329: feature_name=hsa04261	hsa04261.value <= threshold=0.015952877700328827
node_330: feature_name=hsa05218	hsa05218.value > threshold=0.6024213135242462
node_618: feature_name=hsa05200	hsa05200.value > threshold=0.6692508459091187
node_632: feature_name=n151	n151.value > threshold=0.03717700019478798
node_634: feature_name=n374	n374.value > threshold=0.04728049971163273
node_650: feature_name=w22	w22.value > threshold=-0.10097500309348106
node_656: feature_name=hsa04071	hsa04071.value <= threshold=0.7725237011909485
Class: GBM
Rules_79	passed counts:8
node_0: feature_name=hsa05216	hsa05216.value <= threshold=0.008738384582102299
node_1: feature_name=hsa04960	hsa04960.value <= threshold=1.185187578201294
node_2: feature_name=n361	n361.value > threshold=0.009753999765962362
node_328: feature_name=n466	n466.value <= threshold=-0.05319850146770477
node_329: feature_name=hsa04261	hsa04261.value <= threshold=0.015952877700328827
node_330: feature_name=hsa05218	hsa05218.value <= threshold=0.6024213135242462
node_331: feature_name=hsa05211	hsa05211.value <= threshold=0.6050123870372772
node_332: feature_name=hsa03440	hsa03440.value <= threshold=0.826141357421875
node_333: feature_name=w78	w78.value <= threshold=0.26707249879837036
node_334: feature_name=n89	n89.value > threshold=0.03955399990081787
node_452: feature_name=n102	n102.value <= threshold=0.06385499984025955
node_453: feature_name=n68	n68.value > threshold=-0.11220549792051315
node_469: feature_name=w250	w250.value <= threshold=-0.232184000313282
node_470: feature_name=n331	n331.value > threshold=0.0025989999412558973
node_474: feature_name=hsa04014	hsa04014.value <= threshold=0.15676987171173096
Class: OV
Rules_80	passed counts:8
node_0: feature_name=hsa05216	hsa05216.value <= threshold=0.008738384582102299
node_1: feature_name=hsa04960	hsa04960.value <= threshold=1.185187578201294
node_2: feature_name=n361	n361.value > threshold=0.009753999765962362
node_328: feature_name=n466	n466.value <= threshold=-0.05319850146770477
node_329: feature_name=hsa04261	hsa04261.value <= threshold=0.015952877700328827
node_330: feature_name=hsa05218	hsa05218.value <= threshold=0.6024213135242462
node_331: feature_name=hsa05211	hsa05211.value <= threshold=0.6050123870372772
node_332: feature_name=hsa03440	hsa03440.value <= threshold=0.826141357421875
node_333: feature_name=w78	w78.value <= threshold=0.26707249879837036
node_334: feature_name=n89	n89.value <= threshold=0.03955399990081787
node_335: feature_name=n379	n379.value > threshold=-0.013270499650388956
node_449: feature_name=n96	n96.value > threshold=-0.09300999715924263
Class: BRCA
Rules_81	passed counts:8
node_0: feature_name=hsa05216	hsa05216.value <= threshold=0.008738384582102299
node_1: feature_name=hsa04960	hsa04960.value <= threshold=1.185187578201294
node_2: feature_name=n361	n361.value > threshold=0.009753999765962362
node_328: feature_name=n466	n466.value <= threshold=-0.05319850146770477
node_329: feature_name=hsa04261	hsa04261.value <= threshold=0.015952877700328827
node_330: feature_name=hsa05218	hsa05218.value <= threshold=0.6024213135242462
node_331: feature_name=hsa05211	hsa05211.value <= threshold=0.6050123870372772
node_332: feature_name=hsa03440	hsa03440.value <= threshold=0.826141357421875
node_333: feature_name=w78	w78.value <= threshold=0.26707249879837036
node_334: feature_name=n89	n89.value <= threshold=0.03955399990081787
node_335: feature_name=n379	n379.value <= threshold=-0.013270499650388956
node_336: feature_name=n105	n105.value <= threshold=-0.009290999732911587
node_337: feature_name=n355	n355.value <= threshold=0.051767999306321144
node_338: feature_name=n128	n128.value > threshold=0.0660490021109581
node_408: feature_name=n469	n469.value > threshold=-0.0073235000018030405
Class: BRCA
Rules_82	passed counts:7
node_0: feature_name=hsa05216	hsa05216.value > threshold=0.008738384582102299
node_1064: feature_name=hsa05211	hsa05211.value > threshold=0.01115855760872364
node_1478: feature_name=hsa04730	hsa04730.value > threshold=0.4203944057226181
node_1668: feature_name=hsa04740	hsa04740.value > threshold=1.529222011566162
node_1952: feature_name=n326	n326.value > threshold=0.04410549998283386
node_1976: feature_name=n474	n474.value > threshold=-0.08542549982666969
Class: UCEC
Rules_83	passed counts:7
node_0: feature_name=hsa05216	hsa05216.value > threshold=0.008738384582102299
node_1064: feature_name=hsa05211	hsa05211.value > threshold=0.01115855760872364
node_1478: feature_name=hsa04730	hsa04730.value > threshold=0.4203944057226181
node_1668: feature_name=hsa04740	hsa04740.value <= threshold=1.529222011566162
node_1669: feature_name=n462	n462.value > threshold=0.04168100096285343
node_1801: feature_name=w59	w59.value > threshold=0.1346680000424385
node_1805: feature_name=hsa00562	hsa00562.value > threshold=0.7899944186210632
node_1903: feature_name=n447	n447.value > threshold=-0.0701340027153492
node_1929: feature_name=hsa04666	hsa04666.value > threshold=0.5750432908535004
node_1937: feature_name=hsa05169	hsa05169.value > threshold=0.862568199634552
node_1949: feature_name=n396	n396.value <= threshold=0.015232999809086323
Class: BRCA
Rules_84	passed counts:7
node_0: feature_name=hsa05216	hsa05216.value > threshold=0.008738384582102299
node_1064: feature_name=hsa05211	hsa05211.value > threshold=0.01115855760872364
node_1478: feature_name=hsa04730	hsa04730.value > threshold=0.4203944057226181
node_1668: feature_name=hsa04740	hsa04740.value <= threshold=1.529222011566162
node_1669: feature_name=n462	n462.value > threshold=0.04168100096285343
node_1801: feature_name=w59	w59.value > threshold=0.1346680000424385
node_1805: feature_name=hsa00562	hsa00562.value > threshold=0.7899944186210632
node_1903: feature_name=n447	n447.value <= threshold=-0.0701340027153492
node_1904: feature_name=w198	w198.value > threshold=-0.045126501470804214
node_1912: feature_name=n177	n177.value <= threshold=-0.015010000206530094
node_1913: feature_name=w126	w126.value > threshold=-0.15514300018548965
Class: UCEC
Rules_85	passed counts:7
node_0: feature_name=hsa05216	hsa05216.value > threshold=0.008738384582102299
node_1064: feature_name=hsa05211	hsa05211.value > threshold=0.01115855760872364
node_1478: feature_name=hsa04730	hsa04730.value > threshold=0.4203944057226181
node_1668: feature_name=hsa04740	hsa04740.value <= threshold=1.529222011566162
node_1669: feature_name=n462	n462.value <= threshold=0.04168100096285343
node_1670: feature_name=hsa04320	hsa04320.value > threshold=0.7822191715240479
node_1742: feature_name=hsa00562	hsa00562.value <= threshold=1.9364370703697205
node_1743: feature_name=hsa05230	hsa05230.value <= threshold=0.6107595264911652
node_1744: feature_name=n222	n222.value > threshold=-0.11944949999451637
node_1750: feature_name=n307	n307.value > threshold=-0.0732945017516613
Class: COADREAD
Rules_86	passed counts:7
node_0: feature_name=hsa05216	hsa05216.value > threshold=0.008738384582102299
node_1064: feature_name=hsa05211	hsa05211.value > threshold=0.01115855760872364
node_1478: feature_name=hsa04730	hsa04730.value <= threshold=0.4203944057226181
node_1479: feature_name=hsa04150	hsa04150.value <= threshold=0.8959079086780548
node_1480: feature_name=hsa04740	hsa04740.value <= threshold=0.8457262516021729
node_1481: feature_name=w39	w39.value > threshold=-0.059428999200463295
node_1497: feature_name=hsa05212	hsa05212.value > threshold=0.022007528692483902
node_1505: feature_name=n102	n102.value > threshold=0.062161000445485115
node_1549: feature_name=n360	n360.value > threshold=-0.0414854995906353
node_1555: feature_name=hsa04666	hsa04666.value > threshold=0.8284739255905151
Class: UCEC
Rules_87	passed counts:7
node_0: feature_name=hsa05216	hsa05216.value > threshold=0.008738384582102299
node_1064: feature_name=hsa05211	hsa05211.value > threshold=0.01115855760872364
node_1478: feature_name=hsa04730	hsa04730.value <= threshold=0.4203944057226181
node_1479: feature_name=hsa04150	hsa04150.value <= threshold=0.8959079086780548
node_1480: feature_name=hsa04740	hsa04740.value <= threshold=0.8457262516021729
node_1481: feature_name=w39	w39.value > threshold=-0.059428999200463295
node_1497: feature_name=hsa05212	hsa05212.value > threshold=0.022007528692483902
node_1505: feature_name=n102	n102.value > threshold=0.062161000445485115
node_1549: feature_name=n360	n360.value > threshold=-0.0414854995906353
node_1555: feature_name=hsa04666	hsa04666.value <= threshold=0.8284739255905151
node_1556: feature_name=w245	w245.value <= threshold=-0.1068740002810955
node_1557: feature_name=hsa04380	hsa04380.value <= threshold=0.01892276667058468
node_1558: feature_name=w248	w248.value > threshold=0.06074349954724312
Class: HNSC
Rules_88	passed counts:7
node_0: feature_name=hsa05216	hsa05216.value > threshold=0.008738384582102299
node_1064: feature_name=hsa05211	hsa05211.value > threshold=0.01115855760872364
node_1478: feature_name=hsa04730	hsa04730.value <= threshold=0.4203944057226181
node_1479: feature_name=hsa04150	hsa04150.value <= threshold=0.8959079086780548
node_1480: feature_name=hsa04740	hsa04740.value <= threshold=0.8457262516021729
node_1481: feature_name=w39	w39.value > threshold=-0.059428999200463295
node_1497: feature_name=hsa05212	hsa05212.value > threshold=0.022007528692483902
node_1505: feature_name=n102	n102.value > threshold=0.062161000445485115
node_1549: feature_name=n360	n360.value <= threshold=-0.0414854995906353
node_1550: feature_name=n90	n90.value > threshold=-0.0011359999552951194
Class: BRCA
Rules_89	passed counts:7
node_0: feature_name=hsa05216	hsa05216.value > threshold=0.008738384582102299
node_1064: feature_name=hsa05211	hsa05211.value > threshold=0.01115855760872364
node_1478: feature_name=hsa04730	hsa04730.value <= threshold=0.4203944057226181
node_1479: feature_name=hsa04150	hsa04150.value <= threshold=0.8959079086780548
node_1480: feature_name=hsa04740	hsa04740.value <= threshold=0.8457262516021729
node_1481: feature_name=w39	w39.value > threshold=-0.059428999200463295
node_1497: feature_name=hsa05212	hsa05212.value > threshold=0.022007528692483902
node_1505: feature_name=n102	n102.value <= threshold=0.062161000445485115
node_1506: feature_name=w82	w82.value <= threshold=0.3311319947242737
node_1507: feature_name=n344	n344.value <= threshold=-0.0320459995418787
node_1508: feature_name=n359	n359.value <= threshold=-0.055940499529242516
node_1509: feature_name=n377	n377.value > threshold=0.007264500018209219
node_1511: feature_name=n246	n246.value <= threshold=-0.009382499847561121
node_1512: feature_name=hsa04932	hsa04932.value > threshold=0.19290481507778168
Class: HNSC
Rules_90	passed counts:7
node_0: feature_name=hsa05216	hsa05216.value > threshold=0.008738384582102299
node_1064: feature_name=hsa05211	hsa05211.value <= threshold=0.01115855760872364
node_1065: feature_name=w39	w39.value > threshold=-0.04286150075495243
node_1305: feature_name=hsa05216	hsa05216.value > threshold=0.7611925005912781
node_1335: feature_name=w232	w232.value > threshold=-0.12021699920296669
node_1343: feature_name=hsa05218	hsa05218.value <= threshold=1.6813135147094727
node_1344: feature_name=hsa05210	hsa05210.value > threshold=0.5064268708229065
node_1376: feature_name=n6	n6.value <= threshold=0.045470500364899635
node_1377: feature_name=n53	n53.value > threshold=-0.03459149971604347
node_1407: feature_name=hsa04310	hsa04310.value > threshold=0.3557337373495102
node_1415: feature_name=hsa04550	hsa04550.value <= threshold=0.9157649874687195
node_1416: feature_name=hsa05146	hsa05146.value > threshold=0.6711316108703613
Class: OV
Rules_91	passed counts:7
node_0: feature_name=hsa05216	hsa05216.value > threshold=0.008738384582102299
node_1064: feature_name=hsa05211	hsa05211.value <= threshold=0.01115855760872364
node_1065: feature_name=w39	w39.value > threshold=-0.04286150075495243
node_1305: feature_name=hsa05216	hsa05216.value > threshold=0.7611925005912781
node_1335: feature_name=w232	w232.value > threshold=-0.12021699920296669
node_1343: feature_name=hsa05218	hsa05218.value <= threshold=1.6813135147094727
node_1344: feature_name=hsa05210	hsa05210.value > threshold=0.5064268708229065
node_1376: feature_name=n6	n6.value <= threshold=0.045470500364899635
node_1377: feature_name=n53	n53.value > threshold=-0.03459149971604347
node_1407: feature_name=hsa04310	hsa04310.value > threshold=0.3557337373495102
node_1415: feature_name=hsa04550	hsa04550.value <= threshold=0.9157649874687195
node_1416: feature_name=hsa05146	hsa05146.value <= threshold=0.6711316108703613
node_1417: feature_name=hsa04014	hsa04014.value > threshold=0.27705129981040955
node_1447: feature_name=n481	n481.value <= threshold=-0.028678500093519688
Class: COADREAD
Rules_92	passed counts:7
node_0: feature_name=hsa05216	hsa05216.value > threshold=0.008738384582102299
node_1064: feature_name=hsa05211	hsa05211.value <= threshold=0.01115855760872364
node_1065: feature_name=w39	w39.value > threshold=-0.04286150075495243
node_1305: feature_name=hsa05216	hsa05216.value > threshold=0.7611925005912781
node_1335: feature_name=w232	w232.value > threshold=-0.12021699920296669
node_1343: feature_name=hsa05218	hsa05218.value <= threshold=1.6813135147094727
node_1344: feature_name=hsa05210	hsa05210.value > threshold=0.5064268708229065
node_1376: feature_name=n6	n6.value <= threshold=0.045470500364899635
node_1377: feature_name=n53	n53.value <= threshold=-0.03459149971604347
node_1378: feature_name=w119	w119.value > threshold=-0.08481550216674805
node_1384: feature_name=hsa05219	hsa05219.value > threshold=1.030943512916565
Class: OV
Rules_93	passed counts:7
node_0: feature_name=hsa05216	hsa05216.value > threshold=0.008738384582102299
node_1064: feature_name=hsa05211	hsa05211.value <= threshold=0.01115855760872364
node_1065: feature_name=w39	w39.value > threshold=-0.04286150075495243
node_1305: feature_name=hsa05216	hsa05216.value > threshold=0.7611925005912781
node_1335: feature_name=w232	w232.value > threshold=-0.12021699920296669
node_1343: feature_name=hsa05218	hsa05218.value <= threshold=1.6813135147094727
node_1344: feature_name=hsa05210	hsa05210.value <= threshold=0.5064268708229065
node_1345: feature_name=hsa04151	hsa04151.value > threshold=0.20920895040035248
node_1357: feature_name=n364	n364.value > threshold=0.013187000062316656
node_1371: feature_name=w226	w226.value <= threshold=0.027123999781906605
Class: BLCA
Rules_94	passed counts:7
node_0: feature_name=hsa05216	hsa05216.value > threshold=0.008738384582102299
node_1064: feature_name=hsa05211	hsa05211.value <= threshold=0.01115855760872364
node_1065: feature_name=w39	w39.value > threshold=-0.04286150075495243
node_1305: feature_name=hsa05216	hsa05216.value <= threshold=0.7611925005912781
node_1306: feature_name=n132	n132.value <= threshold=-0.013973000459372997
node_1307: feature_name=hsa05203	hsa05203.value <= threshold=0.1719512641429901
node_1308: feature_name=n32	n32.value <= threshold=0.07674549892544746
node_1309: feature_name=n113	n113.value <= threshold=-0.05748499929904938
Class: LUAD
Rules_95	passed counts:7
node_0: feature_name=hsa05216	hsa05216.value > threshold=0.008738384582102299
node_1064: feature_name=hsa05211	hsa05211.value <= threshold=0.01115855760872364
node_1065: feature_name=w39	w39.value <= threshold=-0.04286150075495243
node_1066: feature_name=hsa05216	hsa05216.value > threshold=0.99088454246521
node_1098: feature_name=n282	n282.value > threshold=0.03852050006389618
node_1298: feature_name=n415	n415.value > threshold=-0.0967239998281002
Class: BRCA
Rules_96	passed counts:7
node_0: feature_name=hsa05216	hsa05216.value > threshold=0.008738384582102299
node_1064: feature_name=hsa05211	hsa05211.value <= threshold=0.01115855760872364
node_1065: feature_name=w39	w39.value <= threshold=-0.04286150075495243
node_1066: feature_name=hsa05216	hsa05216.value <= threshold=0.99088454246521
node_1067: feature_name=n61	n61.value <= threshold=0.02202500030398369
node_1068: feature_name=n237	n237.value > threshold=-0.0370860006660223
node_1070: feature_name=n133	n133.value > threshold=-0.05867600068449974
node_1078: feature_name=n28	n28.value <= threshold=-0.12695900350809097
node_1079: feature_name=n250	n250.value <= threshold=0.017034999560564756
Class: HNSC
Rules_97	passed counts:7
node_0: feature_name=hsa05216	hsa05216.value <= threshold=0.008738384582102299
node_1: feature_name=hsa04960	hsa04960.value <= threshold=1.185187578201294
node_2: feature_name=n361	n361.value > threshold=0.009753999765962362
node_328: feature_name=n466	n466.value <= threshold=-0.05319850146770477
node_329: feature_name=hsa04261	hsa04261.value > threshold=0.015952877700328827
node_659: feature_name=hsa04740	hsa04740.value <= threshold=1.3273355960845947
node_660: feature_name=n462	n462.value > threshold=0.03411350026726723
node_774: feature_name=hsa05100	hsa05100.value <= threshold=1.0211573839187622
node_775: feature_name=hsa04620	hsa04620.value <= threshold=0.534568190574646
node_776: feature_name=n29	n29.value > threshold=0.03420750051736832
node_780: feature_name=n171	n171.value > threshold=0.0236395001411438
node_784: feature_name=n192	n192.value > threshold=0.007774000288918614
node_792: feature_name=n66	n66.value > threshold=0.03300449997186661
node_794: feature_name=n330	n330.value > threshold=0.028506500646471977
node_804: feature_name=w180	w180.value > threshold=0.04491250030696392
node_814: feature_name=hsa04261	hsa04261.value > threshold=0.09786725789308548
node_816: feature_name=hsa05220	hsa05220.value <= threshold=0.9063979089260101
node_817: feature_name=n481	n481.value > threshold=-0.04633349925279617
node_823: feature_name=n158	n158.value <= threshold=-0.021260499954223633
node_824: feature_name=n262	n262.value > threshold=0.0704055018723011
node_828: feature_name=n304	n304.value > threshold=-0.05463600158691406
node_866: feature_name=n133	n133.value > threshold=-0.054160499945282936
node_882: feature_name=n39	n39.value <= threshold=-0.020652000792324543
Class: COADREAD
Rules_98	passed counts:7
node_0: feature_name=hsa05216	hsa05216.value <= threshold=0.008738384582102299
node_1: feature_name=hsa04960	hsa04960.value <= threshold=1.185187578201294
node_2: feature_name=n361	n361.value > threshold=0.009753999765962362
node_328: feature_name=n466	n466.value <= threshold=-0.05319850146770477
node_329: feature_name=hsa04261	hsa04261.value > threshold=0.015952877700328827
node_659: feature_name=hsa04740	hsa04740.value <= threshold=1.3273355960845947
node_660: feature_name=n462	n462.value > threshold=0.03411350026726723
node_774: feature_name=hsa05100	hsa05100.value <= threshold=1.0211573839187622
node_775: feature_name=hsa04620	hsa04620.value <= threshold=0.534568190574646
node_776: feature_name=n29	n29.value > threshold=0.03420750051736832
node_780: feature_name=n171	n171.value > threshold=0.0236395001411438
node_784: feature_name=n192	n192.value > threshold=0.007774000288918614
node_792: feature_name=n66	n66.value > threshold=0.03300449997186661
node_794: feature_name=n330	n330.value <= threshold=0.028506500646471977
node_795: feature_name=w169	w169.value <= threshold=0.3238550126552582
Class: BRCA
Rules_99	passed counts:7
node_0: feature_name=hsa05216	hsa05216.value <= threshold=0.008738384582102299
node_1: feature_name=hsa04960	hsa04960.value <= threshold=1.185187578201294
node_2: feature_name=n361	n361.value > threshold=0.009753999765962362
node_328: feature_name=n466	n466.value <= threshold=-0.05319850146770477
node_329: feature_name=hsa04261	hsa04261.value > threshold=0.015952877700328827
node_659: feature_name=hsa04740	hsa04740.value <= threshold=1.3273355960845947
node_660: feature_name=n462	n462.value > threshold=0.03411350026726723
node_774: feature_name=hsa05100	hsa05100.value <= threshold=1.0211573839187622
node_775: feature_name=hsa04620	hsa04620.value <= threshold=0.534568190574646
node_776: feature_name=n29	n29.value <= threshold=0.03420750051736832
node_777: feature_name=n151	n151.value > threshold=0.03715449944138527
Class: KIRC
Rules_100	passed counts:7
node_0: feature_name=hsa05216	hsa05216.value <= threshold=0.008738384582102299
node_1: feature_name=hsa04960	hsa04960.value <= threshold=1.185187578201294
node_2: feature_name=n361	n361.value > threshold=0.009753999765962362
node_328: feature_name=n466	n466.value <= threshold=-0.05319850146770477
node_329: feature_name=hsa04261	hsa04261.value <= threshold=0.015952877700328827
node_330: feature_name=hsa05218	hsa05218.value > threshold=0.6024213135242462
node_618: feature_name=hsa05200	hsa05200.value > threshold=0.6692508459091187
node_632: feature_name=n151	n151.value > threshold=0.03717700019478798
node_634: feature_name=n374	n374.value <= threshold=0.04728049971163273
node_635: feature_name=n484	n484.value > threshold=-0.006784499855712056
node_637: feature_name=w12	w12.value <= threshold=-0.16518300026655197
node_638: feature_name=w59	w59.value > threshold=0.17471149563789368
Class: UCEC
Rules_101	passed counts:6
node_0: feature_name=hsa05216	hsa05216.value > threshold=0.008738384582102299
node_1064: feature_name=hsa05211	hsa05211.value > threshold=0.01115855760872364
node_1478: feature_name=hsa04730	hsa04730.value > threshold=0.4203944057226181
node_1668: feature_name=hsa04740	hsa04740.value <= threshold=1.529222011566162
node_1669: feature_name=n462	n462.value > threshold=0.04168100096285343
node_1801: feature_name=w59	w59.value > threshold=0.1346680000424385
node_1805: feature_name=hsa00562	hsa00562.value <= threshold=0.7899944186210632
node_1806: feature_name=hsa05213	hsa05213.value > threshold=1.5140634179115295
node_1880: feature_name=hsa04550	hsa04550.value <= threshold=0.35046570003032684
node_1881: feature_name=n361	n361.value <= threshold=0.015079499687999487
node_1882: feature_name=hsa04664	hsa04664.value <= threshold=1.7290953397750854
Class: HNSC
Rules_102	passed counts:6
node_0: feature_name=hsa05216	hsa05216.value > threshold=0.008738384582102299
node_1064: feature_name=hsa05211	hsa05211.value > threshold=0.01115855760872364
node_1478: feature_name=hsa04730	hsa04730.value > threshold=0.4203944057226181
node_1668: feature_name=hsa04740	hsa04740.value <= threshold=1.529222011566162
node_1669: feature_name=n462	n462.value > threshold=0.04168100096285343
node_1801: feature_name=w59	w59.value > threshold=0.1346680000424385
node_1805: feature_name=hsa00562	hsa00562.value <= threshold=0.7899944186210632
node_1806: feature_name=hsa05213	hsa05213.value <= threshold=1.5140634179115295
node_1807: feature_name=n115	n115.value > threshold=0.020373000763356686
node_1819: feature_name=hsa04360	hsa04360.value <= threshold=0.9092052578926086
node_1820: feature_name=n299	n299.value <= threshold=-0.09468900039792061
node_1821: feature_name=hsa04115	hsa04115.value <= threshold=1.0050025284290314
node_1822: feature_name=n115	n115.value <= threshold=0.03245849907398224
node_1823: feature_name=n492	n492.value > threshold=-0.07925749942660332
node_1827: feature_name=w245	w245.value > threshold=-0.1462154984474182
node_1831: feature_name=n5	n5.value > threshold=0.06022599898278713
node_1841: feature_name=n289	n289.value <= threshold=0.0556699987500906
node_1842: feature_name=w190	w190.value > threshold=0.36719849705696106
Class: BLCA
Rules_103	passed counts:6
node_0: feature_name=hsa05216	hsa05216.value > threshold=0.008738384582102299
node_1064: feature_name=hsa05211	hsa05211.value > threshold=0.01115855760872364
node_1478: feature_name=hsa04730	hsa04730.value > threshold=0.4203944057226181
node_1668: feature_name=hsa04740	hsa04740.value <= threshold=1.529222011566162
node_1669: feature_name=n462	n462.value <= threshold=0.04168100096285343
node_1670: feature_name=hsa04320	hsa04320.value > threshold=0.7822191715240479
node_1742: feature_name=hsa00562	hsa00562.value > threshold=1.9364370703697205
Class: UCEC
Rules_104	passed counts:6
node_0: feature_name=hsa05216	hsa05216.value > threshold=0.008738384582102299
node_1064: feature_name=hsa05211	hsa05211.value > threshold=0.01115855760872364
node_1478: feature_name=hsa04730	hsa04730.value > threshold=0.4203944057226181
node_1668: feature_name=hsa04740	hsa04740.value <= threshold=1.529222011566162
node_1669: feature_name=n462	n462.value <= threshold=0.04168100096285343
node_1670: feature_name=hsa04320	hsa04320.value <= threshold=0.7822191715240479
node_1671: feature_name=n263	n263.value <= threshold=-0.09555699676275253
node_1672: feature_name=w148	w148.value > threshold=-0.0017140000127255917
node_1694: feature_name=n471	n471.value > threshold=0.01637549977749586
Class: LUAD
Rules_105	passed counts:6
node_0: feature_name=hsa05216	hsa05216.value > threshold=0.008738384582102299
node_1064: feature_name=hsa05211	hsa05211.value > threshold=0.01115855760872364
node_1478: feature_name=hsa04730	hsa04730.value <= threshold=0.4203944057226181
node_1479: feature_name=hsa04150	hsa04150.value <= threshold=0.8959079086780548
node_1480: feature_name=hsa04740	hsa04740.value > threshold=0.8457262516021729
node_1594: feature_name=w37	w37.value > threshold=0.1235475018620491
node_1604: feature_name=hsa04066	hsa04066.value > threshold=0.37814486026763916
node_1612: feature_name=n5	n5.value <= threshold=0.06716149672865868
Class: HNSC
Rules_106	passed counts:6
node_0: feature_name=hsa05216	hsa05216.value > threshold=0.008738384582102299
node_1064: feature_name=hsa05211	hsa05211.value > threshold=0.01115855760872364
node_1478: feature_name=hsa04730	hsa04730.value <= threshold=0.4203944057226181
node_1479: feature_name=hsa04150	hsa04150.value <= threshold=0.8959079086780548
node_1480: feature_name=hsa04740	hsa04740.value <= threshold=0.8457262516021729
node_1481: feature_name=w39	w39.value > threshold=-0.059428999200463295
node_1497: feature_name=hsa05212	hsa05212.value > threshold=0.022007528692483902
node_1505: feature_name=n102	n102.value > threshold=0.062161000445485115
node_1549: feature_name=n360	n360.value > threshold=-0.0414854995906353
node_1555: feature_name=hsa04666	hsa04666.value <= threshold=0.8284739255905151
node_1556: feature_name=w245	w245.value <= threshold=-0.1068740002810955
node_1557: feature_name=hsa04380	hsa04380.value > threshold=0.01892276667058468
node_1567: feature_name=n29	n29.value > threshold=0.042861999943852425
node_1581: feature_name=n9	n9.value > threshold=-0.03488000109791756
Class: UCEC
Rules_107	passed counts:6
node_0: feature_name=hsa05216	hsa05216.value > threshold=0.008738384582102299
node_1064: feature_name=hsa05211	hsa05211.value > threshold=0.01115855760872364
node_1478: feature_name=hsa04730	hsa04730.value <= threshold=0.4203944057226181
node_1479: feature_name=hsa04150	hsa04150.value <= threshold=0.8959079086780548
node_1480: feature_name=hsa04740	hsa04740.value <= threshold=0.8457262516021729
node_1481: feature_name=w39	w39.value > threshold=-0.059428999200463295
node_1497: feature_name=hsa05212	hsa05212.value > threshold=0.022007528692483902
node_1505: feature_name=n102	n102.value <= threshold=0.062161000445485115
node_1506: feature_name=w82	w82.value <= threshold=0.3311319947242737
node_1507: feature_name=n344	n344.value <= threshold=-0.0320459995418787
node_1508: feature_name=n359	n359.value <= threshold=-0.055940499529242516
node_1509: feature_name=n377	n377.value <= threshold=0.007264500018209219
Class: LUAD
Rules_108	passed counts:6
node_0: feature_name=hsa05216	hsa05216.value > threshold=0.008738384582102299
node_1064: feature_name=hsa05211	hsa05211.value <= threshold=0.01115855760872364
node_1065: feature_name=w39	w39.value > threshold=-0.04286150075495243
node_1305: feature_name=hsa05216	hsa05216.value > threshold=0.7611925005912781
node_1335: feature_name=w232	w232.value > threshold=-0.12021699920296669
node_1343: feature_name=hsa05218	hsa05218.value <= threshold=1.6813135147094727
node_1344: feature_name=hsa05210	hsa05210.value > threshold=0.5064268708229065
node_1376: feature_name=n6	n6.value <= threshold=0.045470500364899635
node_1377: feature_name=n53	n53.value > threshold=-0.03459149971604347
node_1407: feature_name=hsa04310	hsa04310.value > threshold=0.3557337373495102
node_1415: feature_name=hsa04550	hsa04550.value > threshold=0.9157649874687195
Class: COADREAD
Rules_109	passed counts:6
node_0: feature_name=hsa05216	hsa05216.value > threshold=0.008738384582102299
node_1064: feature_name=hsa05211	hsa05211.value <= threshold=0.01115855760872364
node_1065: feature_name=w39	w39.value > threshold=-0.04286150075495243
node_1305: feature_name=hsa05216	hsa05216.value > threshold=0.7611925005912781
node_1335: feature_name=w232	w232.value > threshold=-0.12021699920296669
node_1343: feature_name=hsa05218	hsa05218.value <= threshold=1.6813135147094727
node_1344: feature_name=hsa05210	hsa05210.value > threshold=0.5064268708229065
node_1376: feature_name=n6	n6.value <= threshold=0.045470500364899635
node_1377: feature_name=n53	n53.value <= threshold=-0.03459149971604347
node_1378: feature_name=w119	w119.value > threshold=-0.08481550216674805
node_1384: feature_name=hsa05219	hsa05219.value <= threshold=1.030943512916565
node_1385: feature_name=w221	w221.value <= threshold=0.24700000137090683
node_1386: feature_name=n474	n474.value <= threshold=-0.08233800157904625
Class: COADREAD
Rules_110	passed counts:6
node_0: feature_name=hsa05216	hsa05216.value > threshold=0.008738384582102299
node_1064: feature_name=hsa05211	hsa05211.value <= threshold=0.01115855760872364
node_1065: feature_name=w39	w39.value > threshold=-0.04286150075495243
node_1305: feature_name=hsa05216	hsa05216.value > threshold=0.7611925005912781
node_1335: feature_name=w232	w232.value > threshold=-0.12021699920296669
node_1343: feature_name=hsa05218	hsa05218.value <= threshold=1.6813135147094727
node_1344: feature_name=hsa05210	hsa05210.value <= threshold=0.5064268708229065
node_1345: feature_name=hsa04151	hsa04151.value > threshold=0.20920895040035248
node_1357: feature_name=n364	n364.value <= threshold=0.013187000062316656
node_1358: feature_name=n182	n182.value <= threshold=-0.009477000217884779
Class: GBM
Rules_111	passed counts:6
node_0: feature_name=hsa05216	hsa05216.value > threshold=0.008738384582102299
[truncated: 14,499 more rows]

## Sheet: Rules on LightGBM feature list
Rules_0	passed counts:160
[truncated: 14,282 more rows]
